# Supplementary material for: Copper(II)-Catalyzed (3+2) Cycloaddition of 2H-Azirines to Six-Membered Cyclic Enols as a Route to Pyrrolo[3,2-c]quinolone, Chromeno[3,4-b]pyrrole, and Naphtho[1,8-ef]indole Scaffolds
Source: MDPI journal article supplement (doi:10.3390/molecules27175681), 2022-09-02
Supplement: s1 [file s1]

**Copper(II)-catalyzed (3+2) cycloaddition of 2*H*-azirines to 6-membered cyclic enols as a route to pyrrolo[3,2-*c*]quinolone, chromeno[3,4-*b*]pyrrole, and naphtho[1,8-*ef*]indole scaffolds**

Pavel A. Sakharov, Nikolai V. Rostovskii,\* Alexander F. Khlebnikov, and Mikhail S. Novikov\*

St. Petersburg State University, Institute of Chemistry, 7/9 Universitetskaya nab.,  
St. Petersburg, 199034, Russia.

E-mail: *n.rostovskiy@spbu.ru*, *m.novikov@spbu.ru*

**Contents:**

|                                      |      |
|--------------------------------------|------|
| 1. NMR Spectra of New Compounds..... | S-2  |
| 2. X-ray Data .....                  | S-39 |
| 3. References.....                   | S-43 |

## NMR Spectra of New Compounds

$^1\text{H}$  NMR (400 MHz,  $\text{DMSO-d}_6$ ) spectrum of compound **1b**

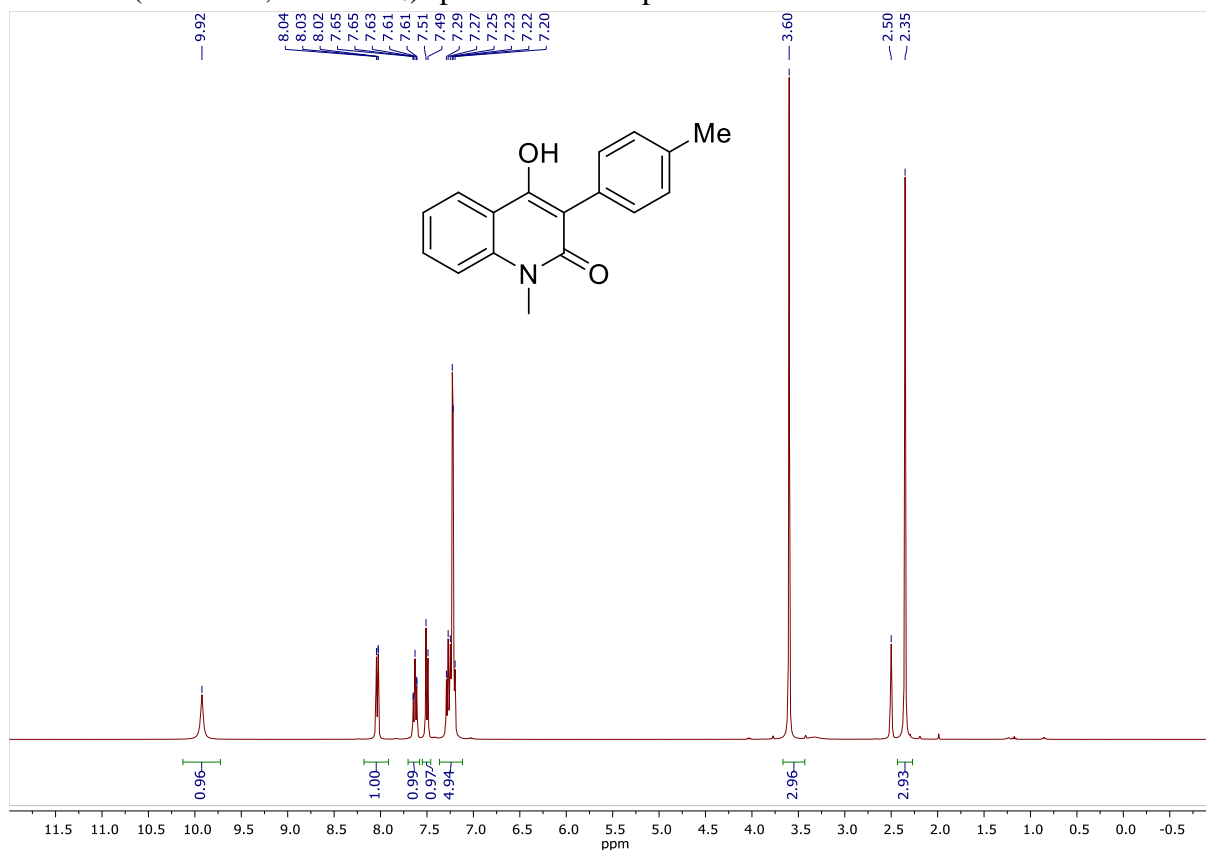

$^{13}\text{C}$  NMR (100 MHz,  $\text{DMSO-d}_6$ ) spectrum of compound **1b**

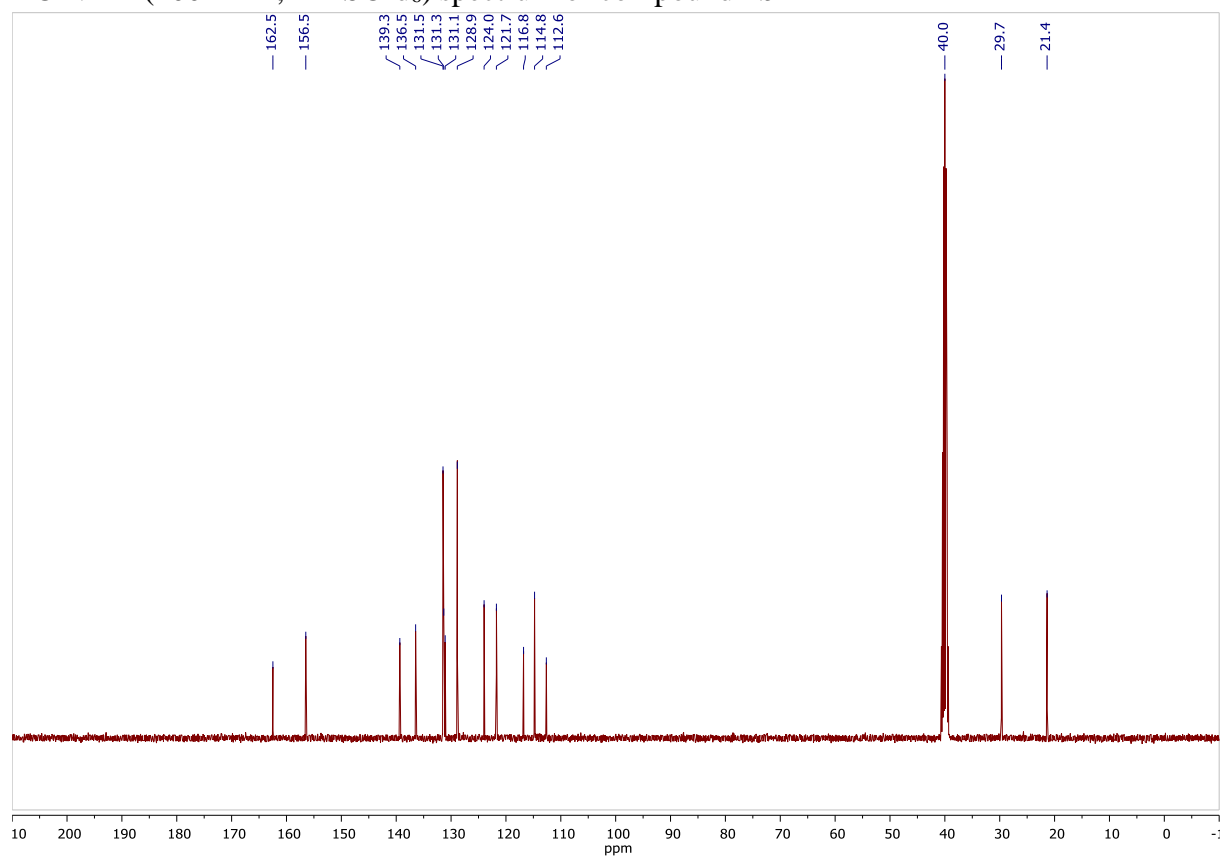

$^1\text{H}$  NMR (400 MHz,  $\text{DMSO-d}_6$ ) spectrum of compound **1d**

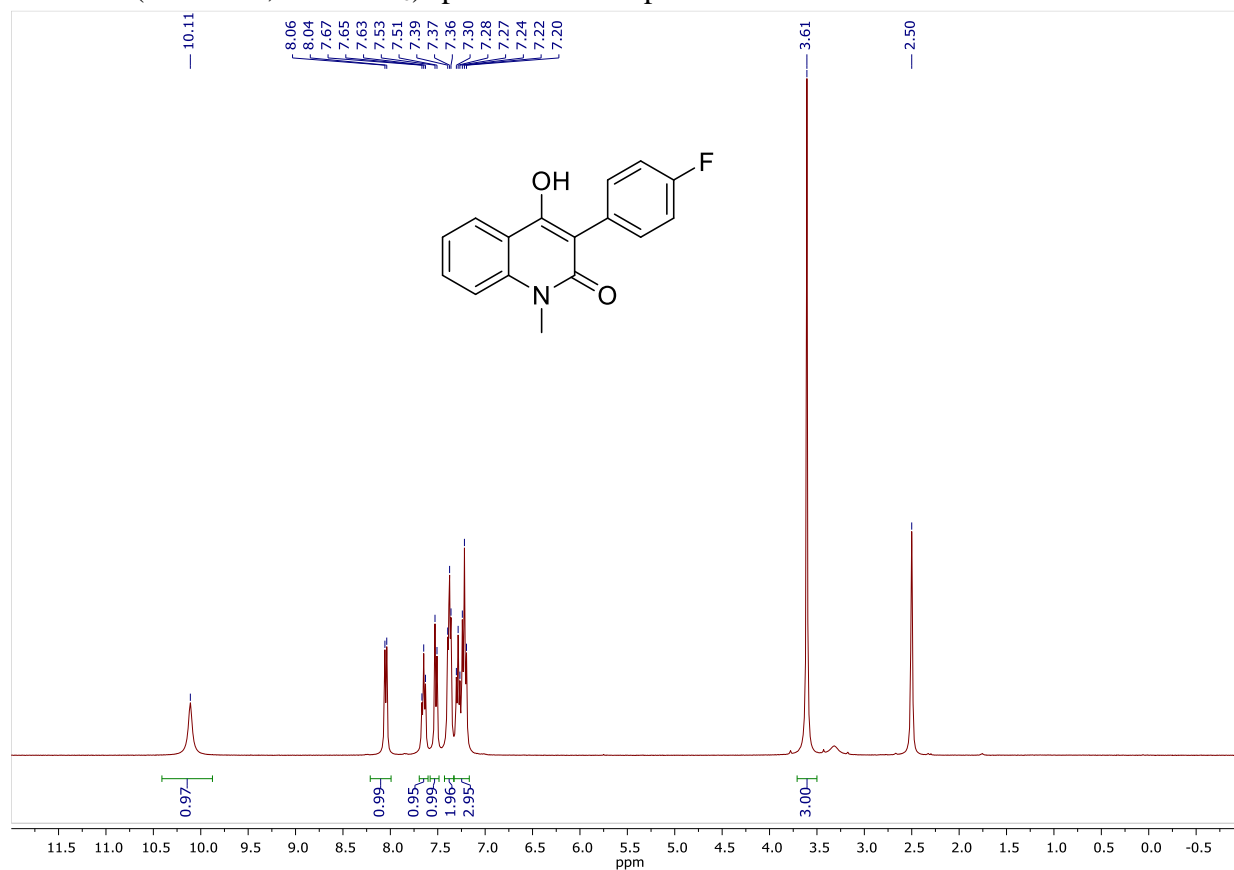

$^{13}\text{C}$  NMR (100 MHz,  $\text{DMSO-d}_6$ ) spectrum of compound **1d**

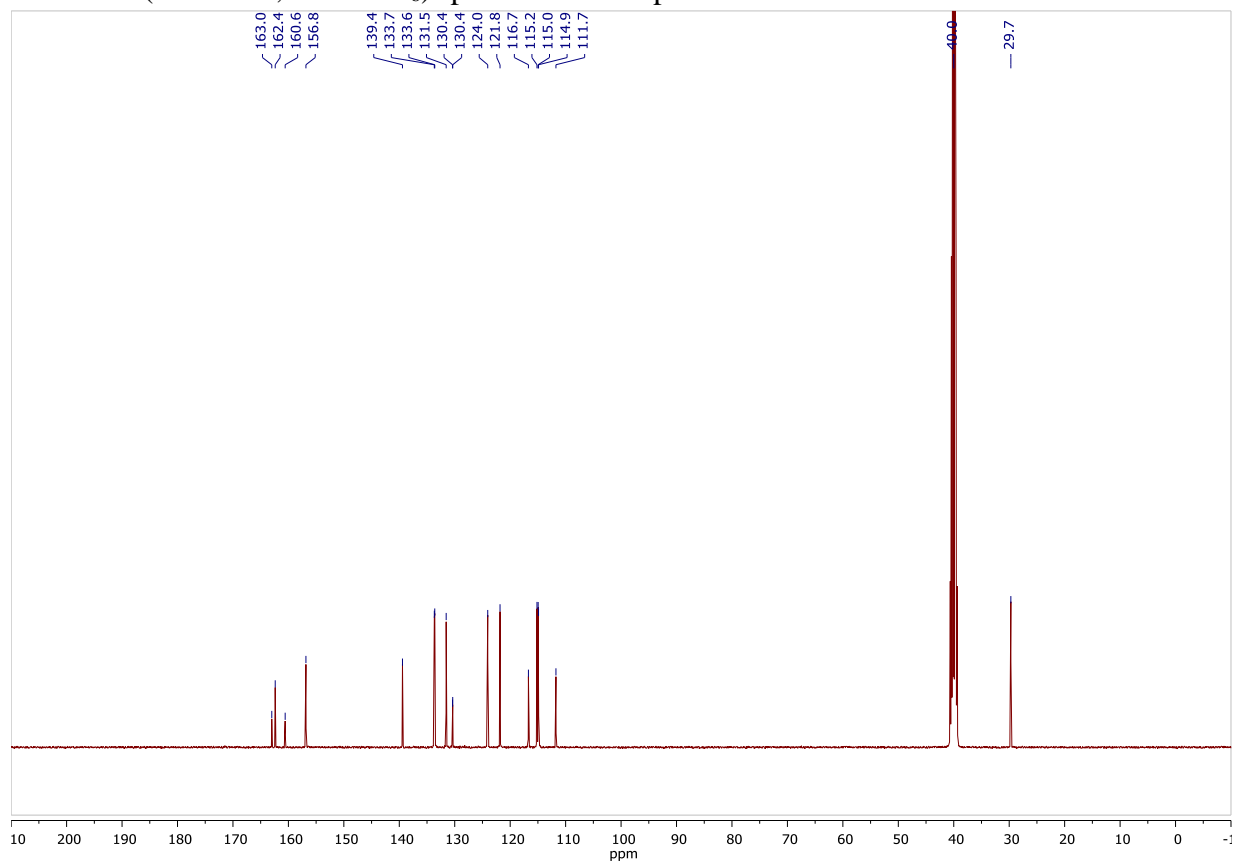

$^1\text{H}$  NMR (400 MHz,  $\text{DMSO-d}_6$ ) spectrum of compound **1e**

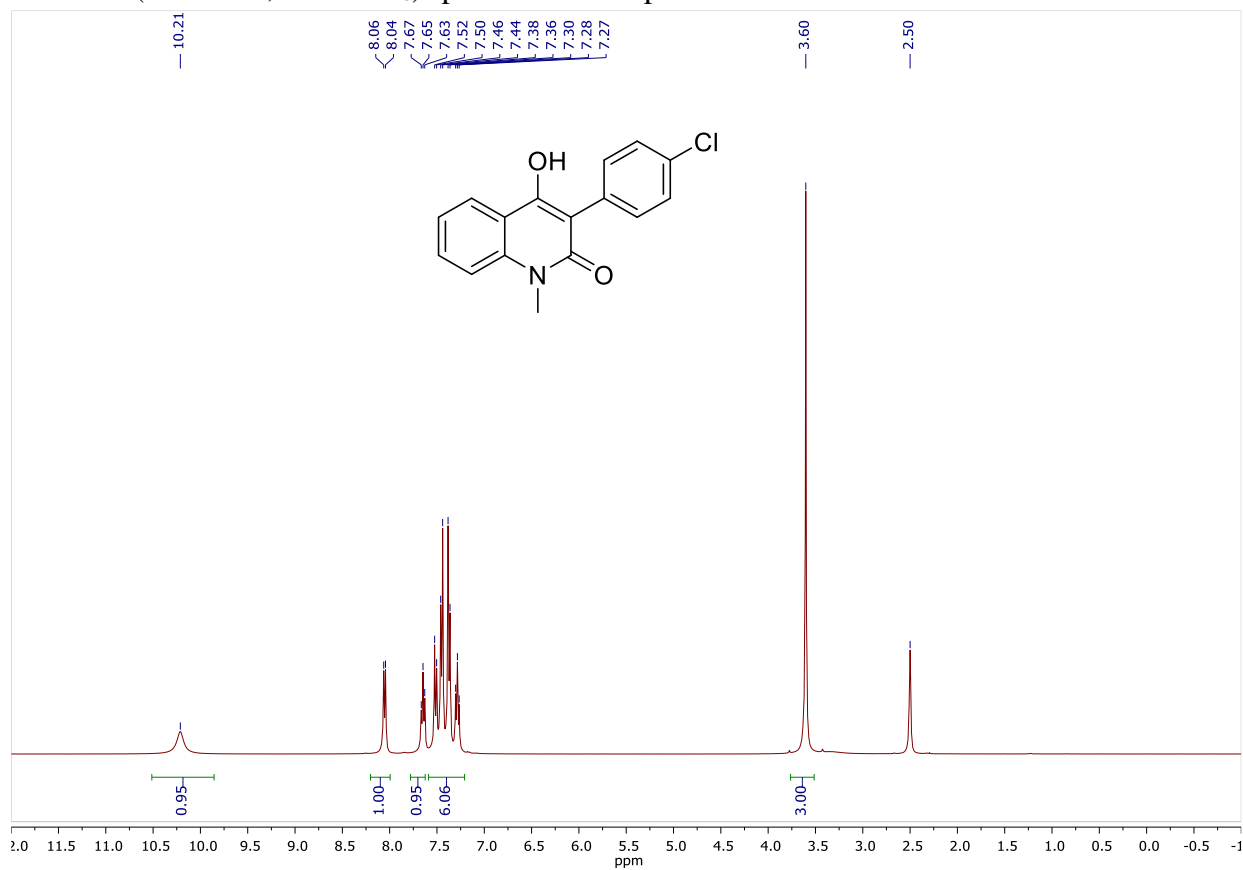

$^{13}\text{C}$  NMR (100 MHz,  $\text{DMSO-d}_6$ ) spectrum of compound **1e**

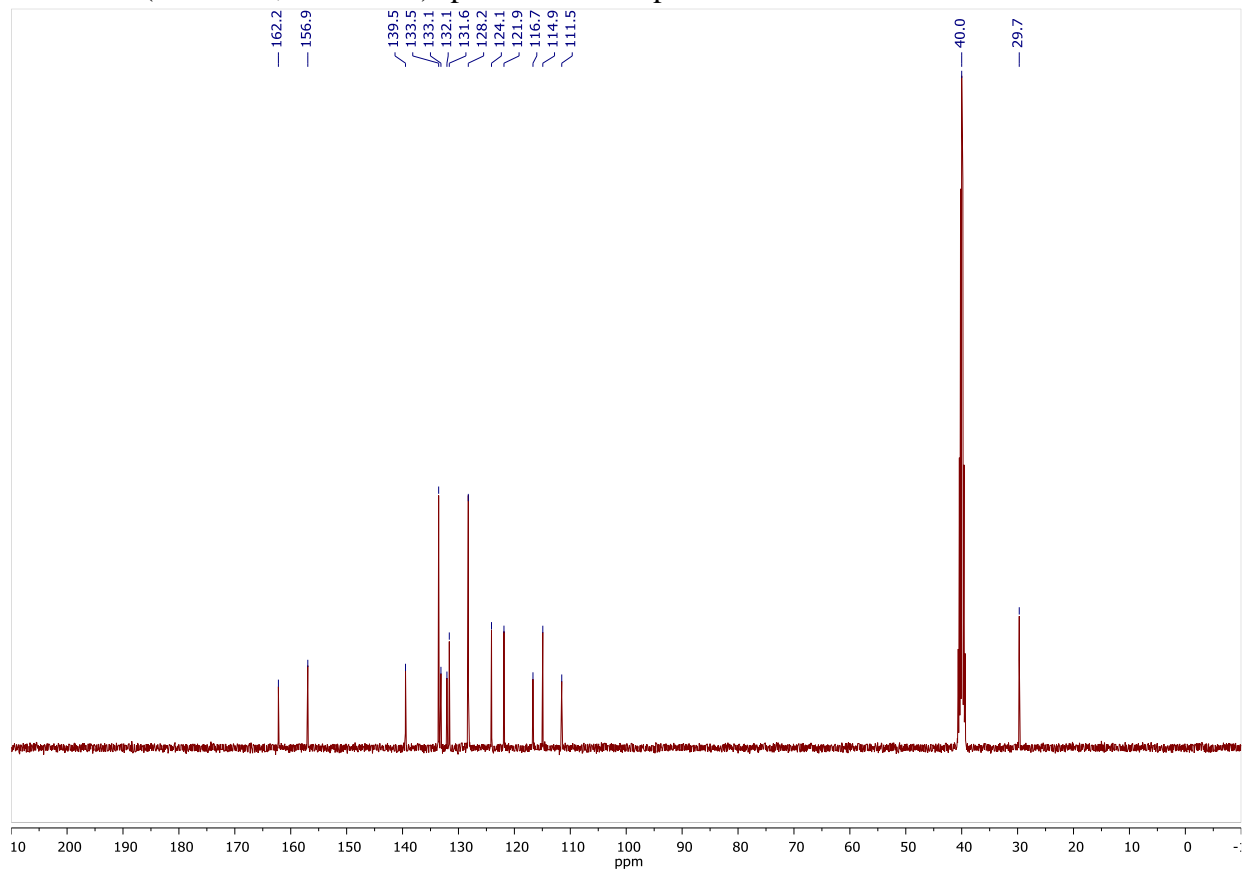

$^1\text{H}$  NMR (400 MHz,  $\text{DMSO-d}_6$ ) spectrum of compound **1f**

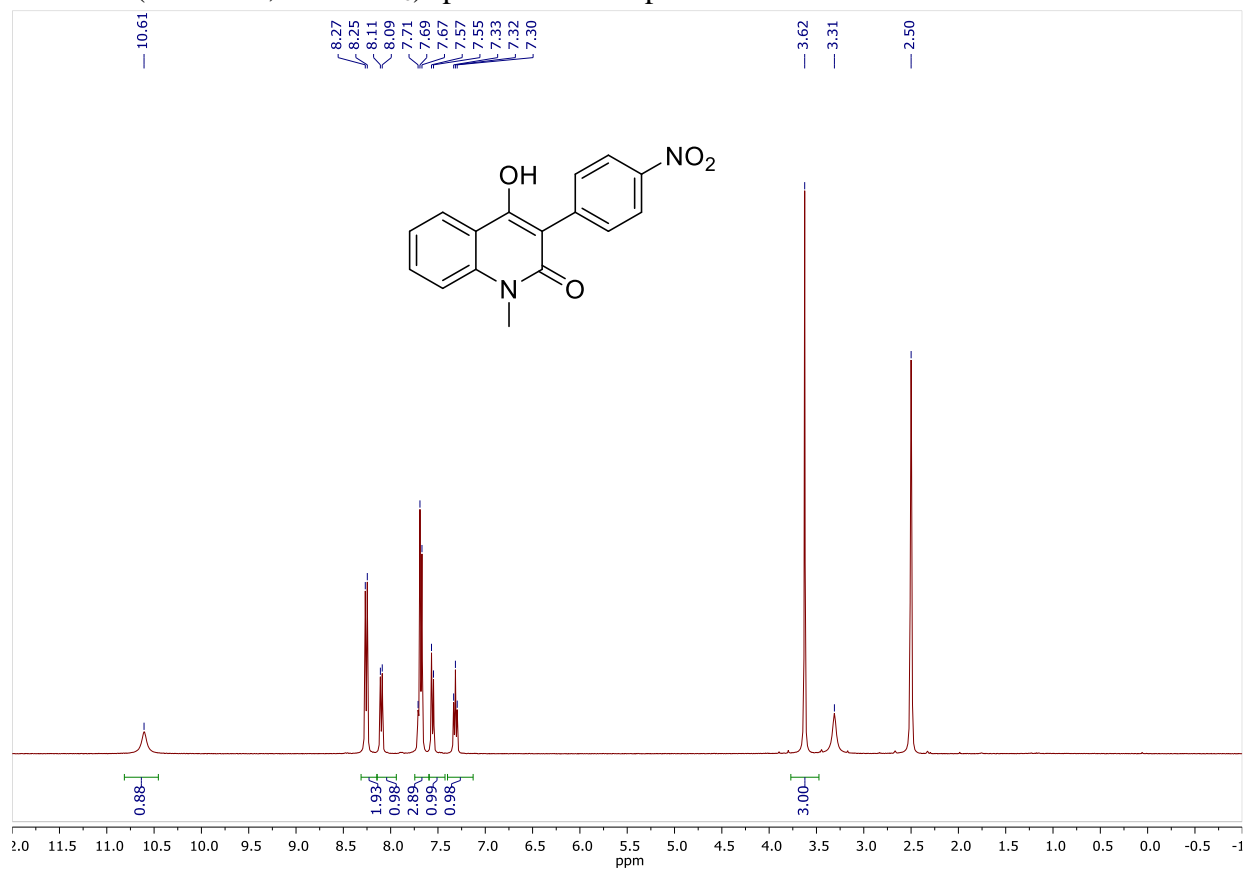

$^{13}\text{C}$  NMR (100 MHz,  $\text{DMSO-d}_6$ ) spectrum of compound **1f**

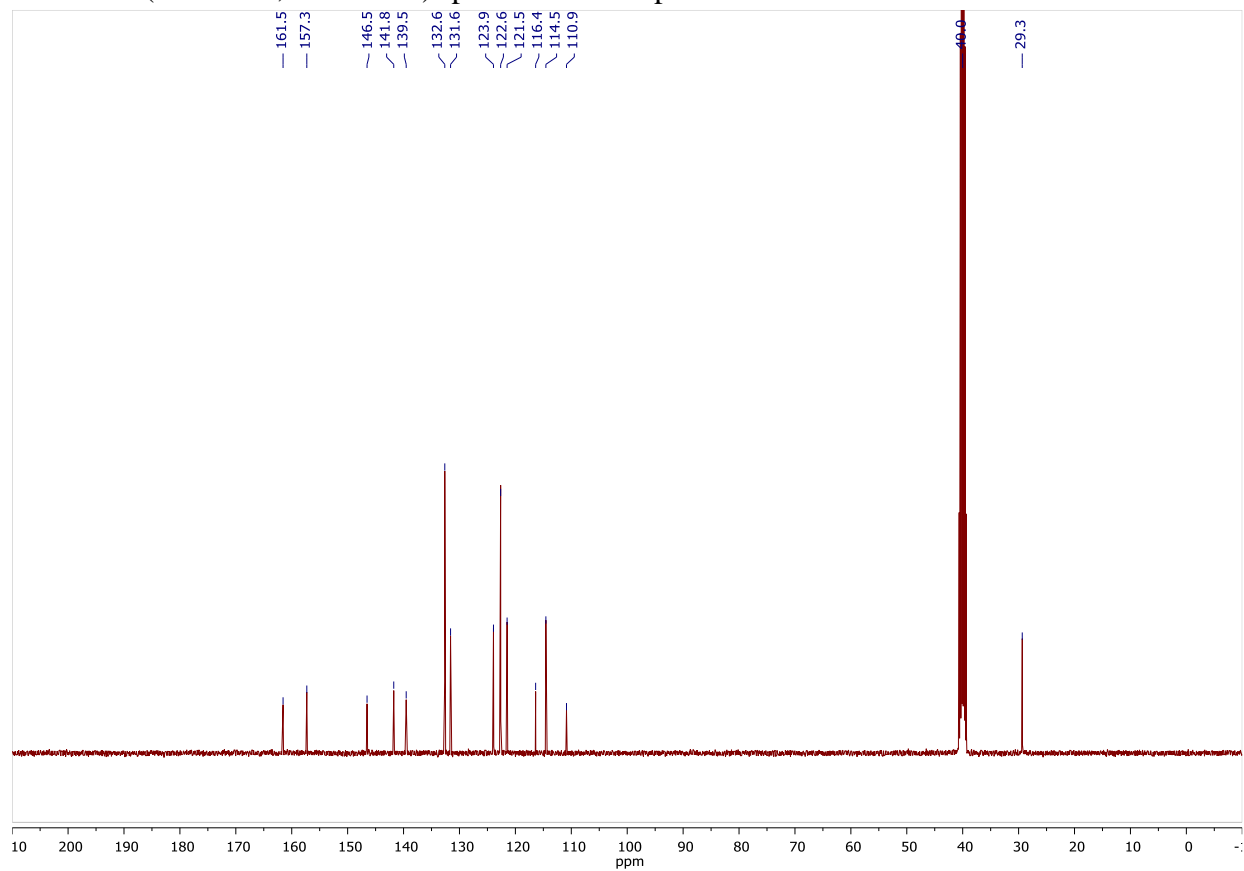

$^1\text{H}$  NMR (400 MHz,  $\text{DMSO-d}_6$ ) spectrum of compound **1g**

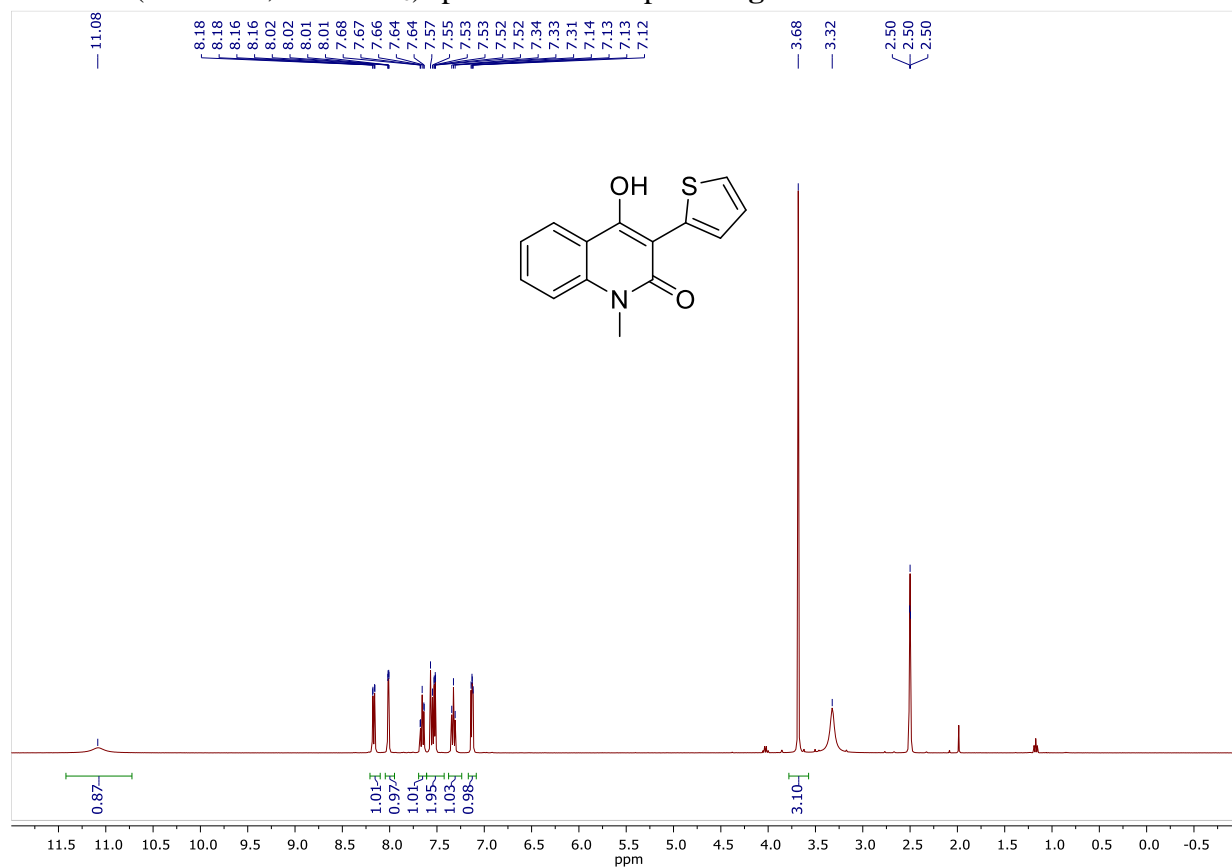

$^{13}\text{C}$  NMR (100 MHz,  $\text{DMSO-d}_6$ ) spectrum of compound **1g**

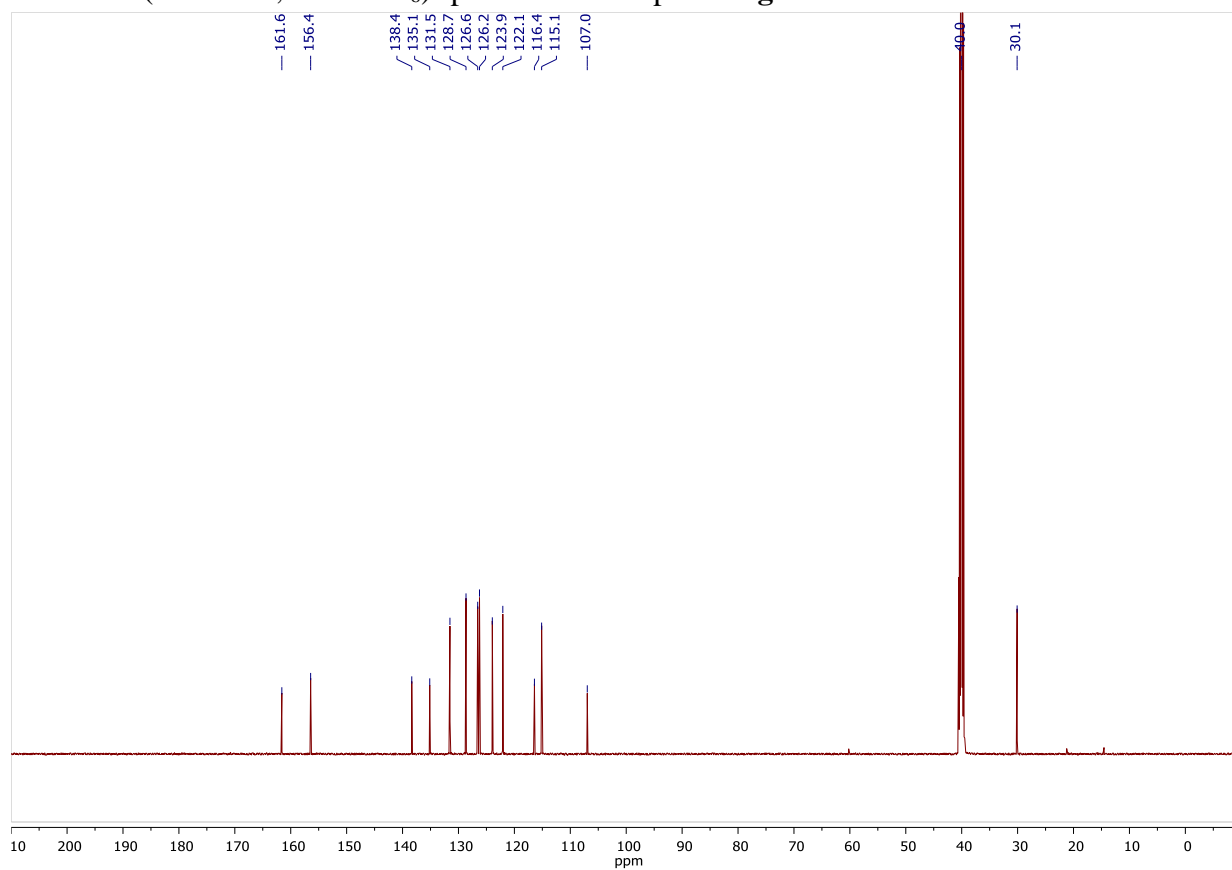

$^1\text{H}$  NMR (400 MHz,  $\text{DMSO-d}_6$ ) spectrum of compound **1h**

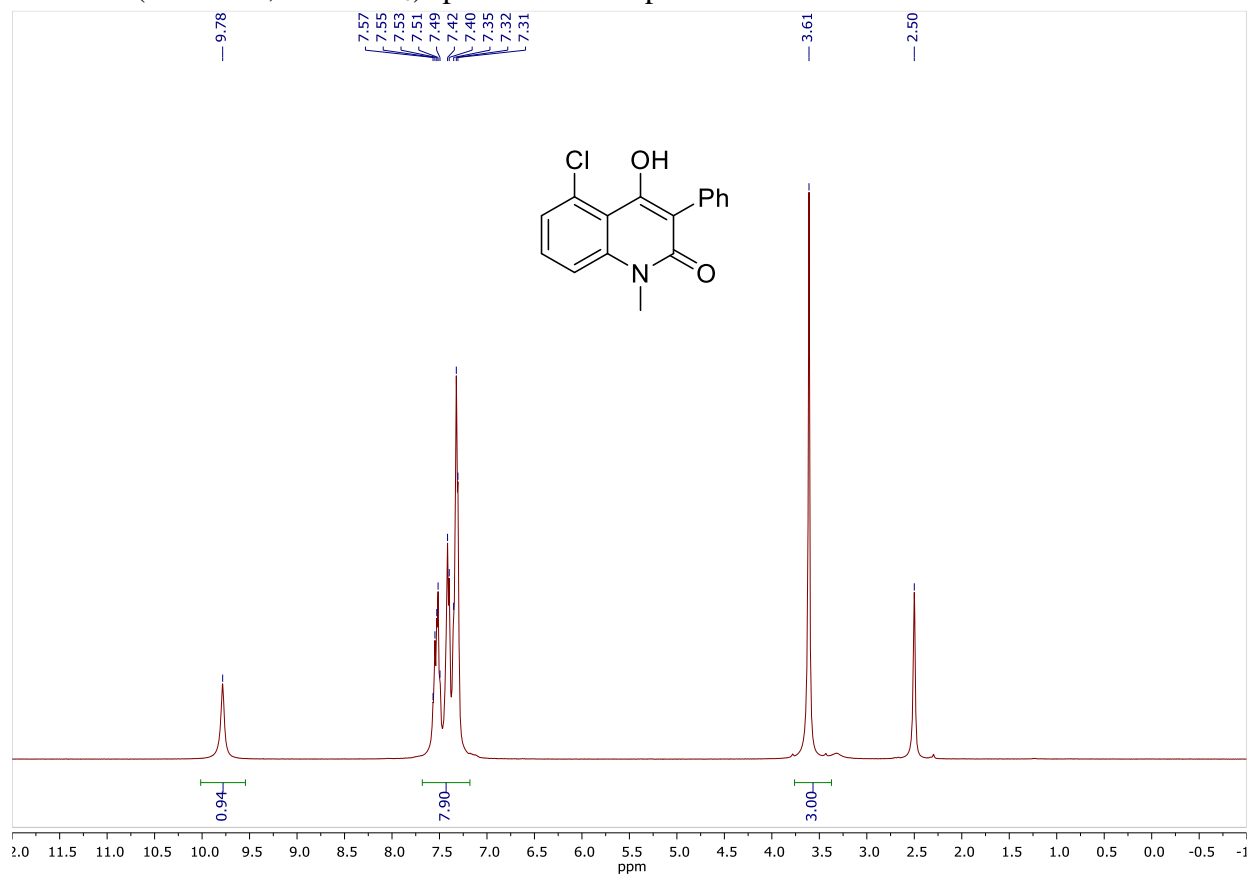

$^{13}\text{C}$  NMR (100 MHz,  $\text{DMSO-d}_6$ ) spectrum of compound **1h**

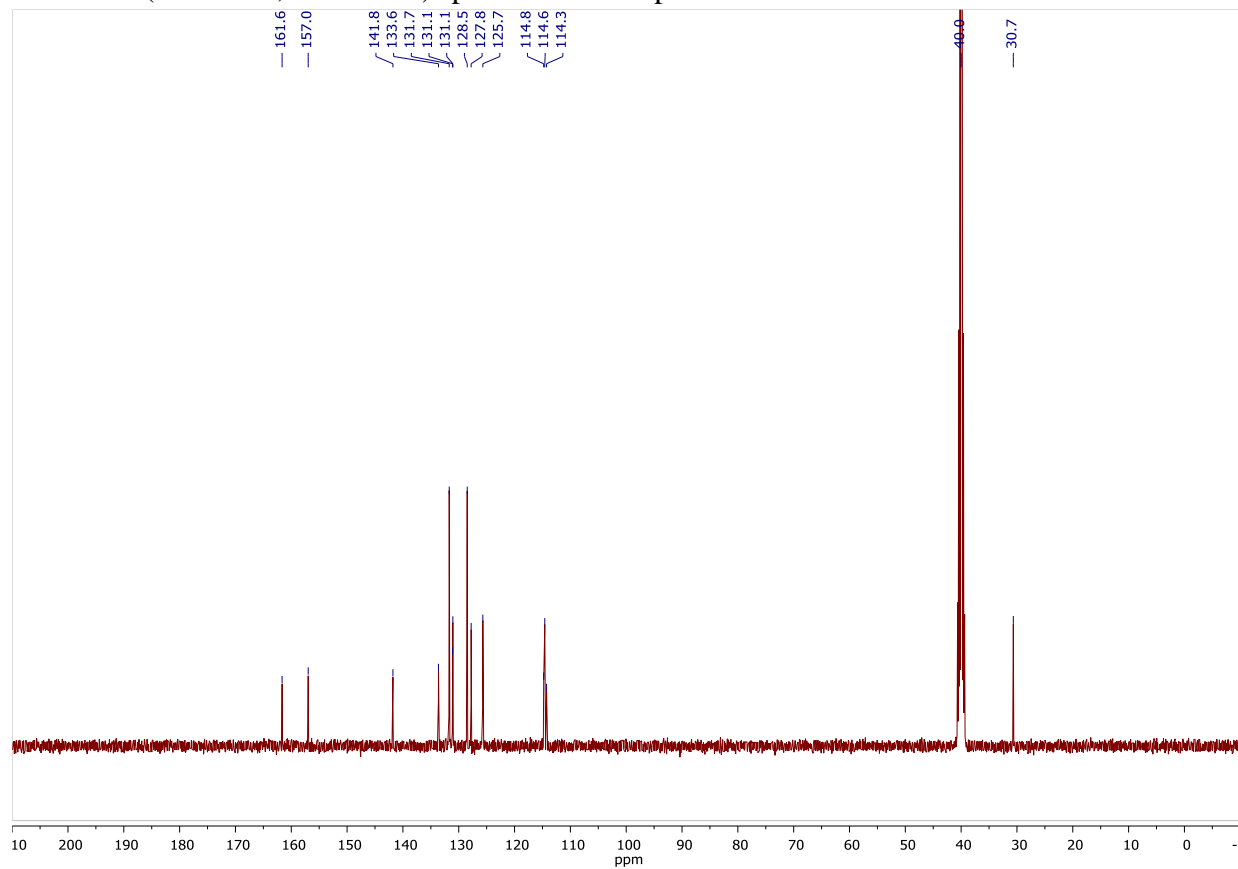

$^1\text{H}$  NMR (400 MHz,  $\text{DMSO-d}_6$ ) spectrum of compound **1i**

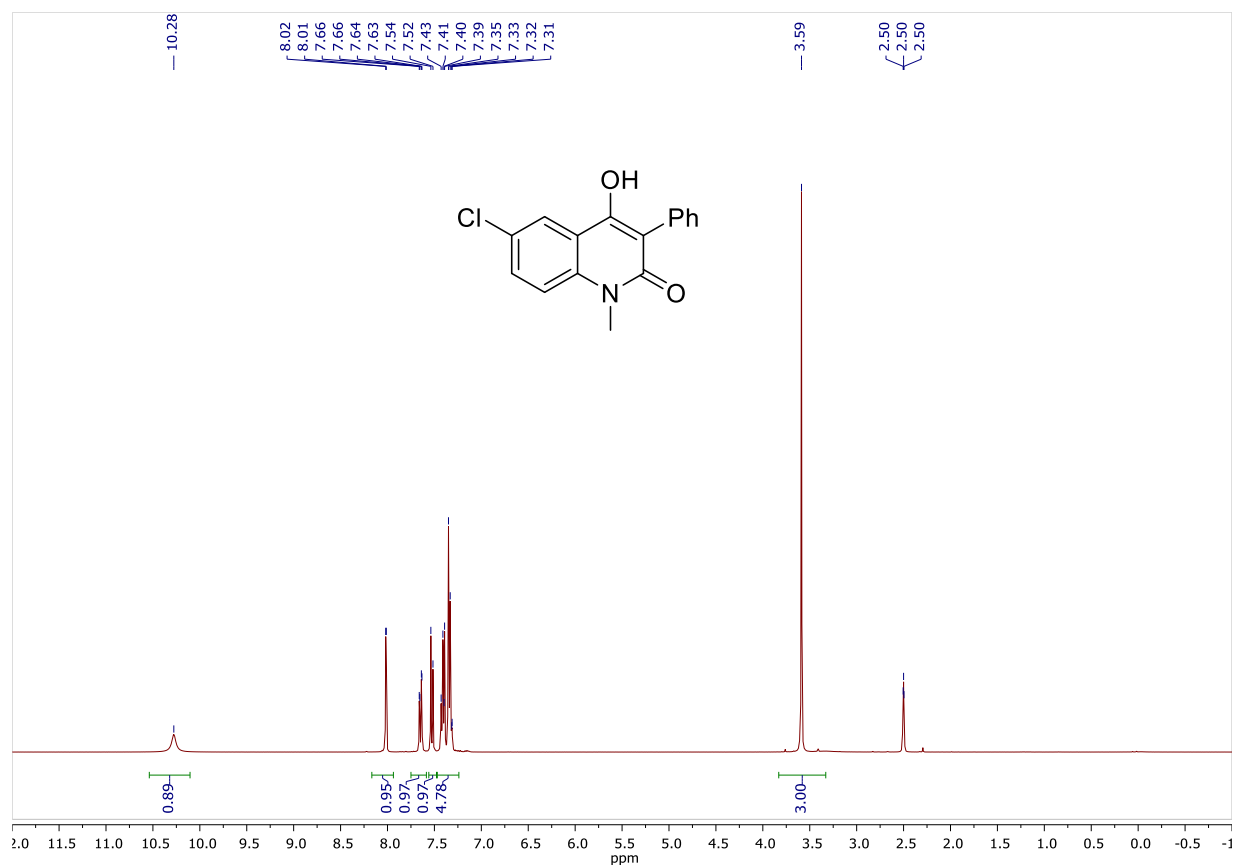

$^{13}\text{C}$  NMR (100 MHz,  $\text{DMSO-d}_6$ ) spectrum of compound **1i**

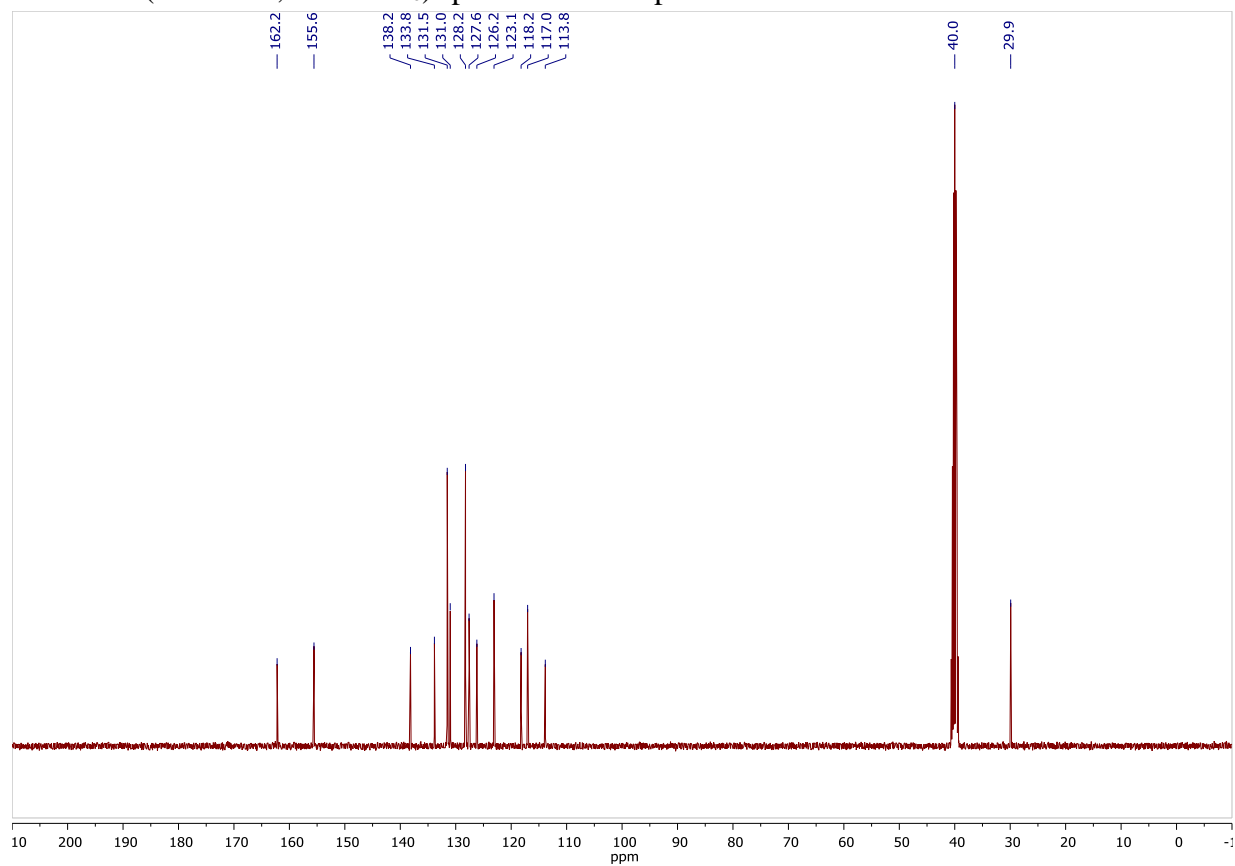



$^1\text{H}$  NMR (400 MHz, DMSO- $d_6$ ) spectrum of compound **1j**

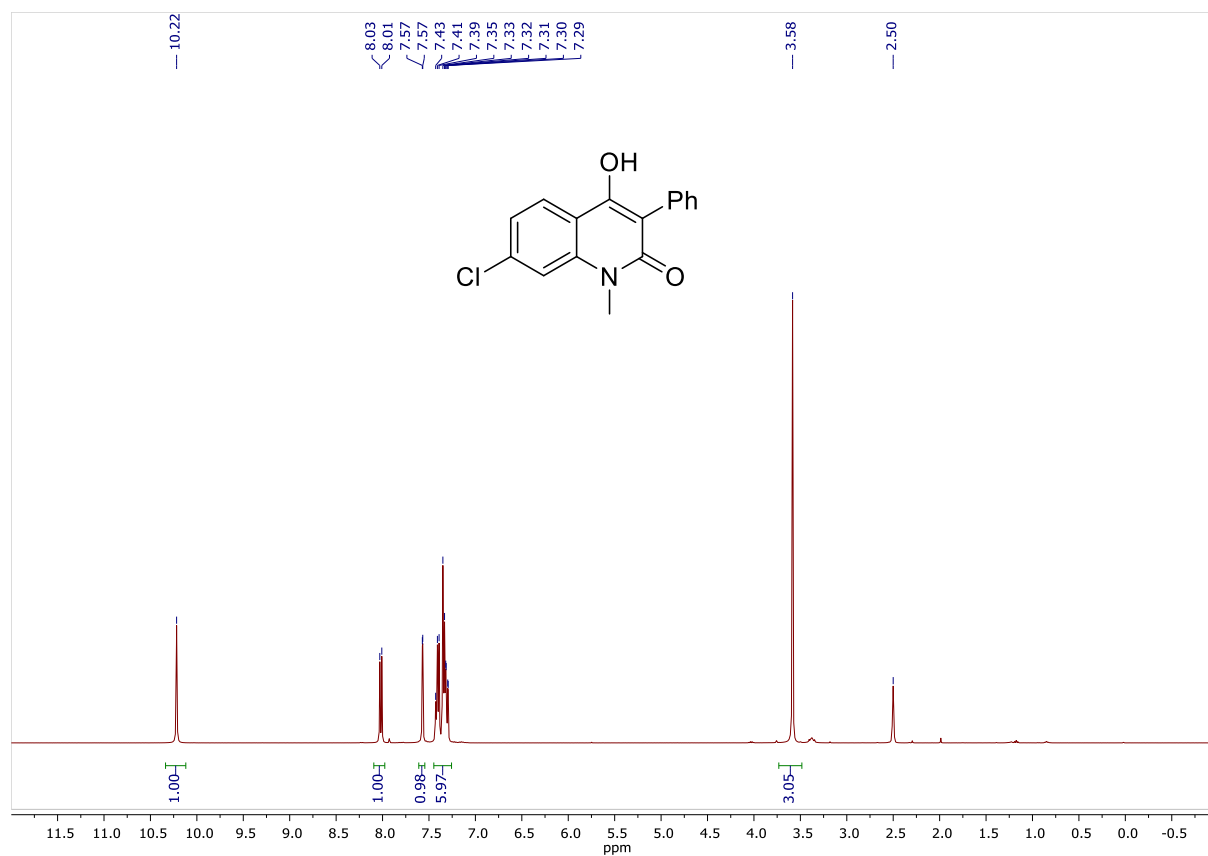

$^{13}\text{C}$  NMR (100 MHz, DMSO- $d_6$ ) spectrum of compound **1j**

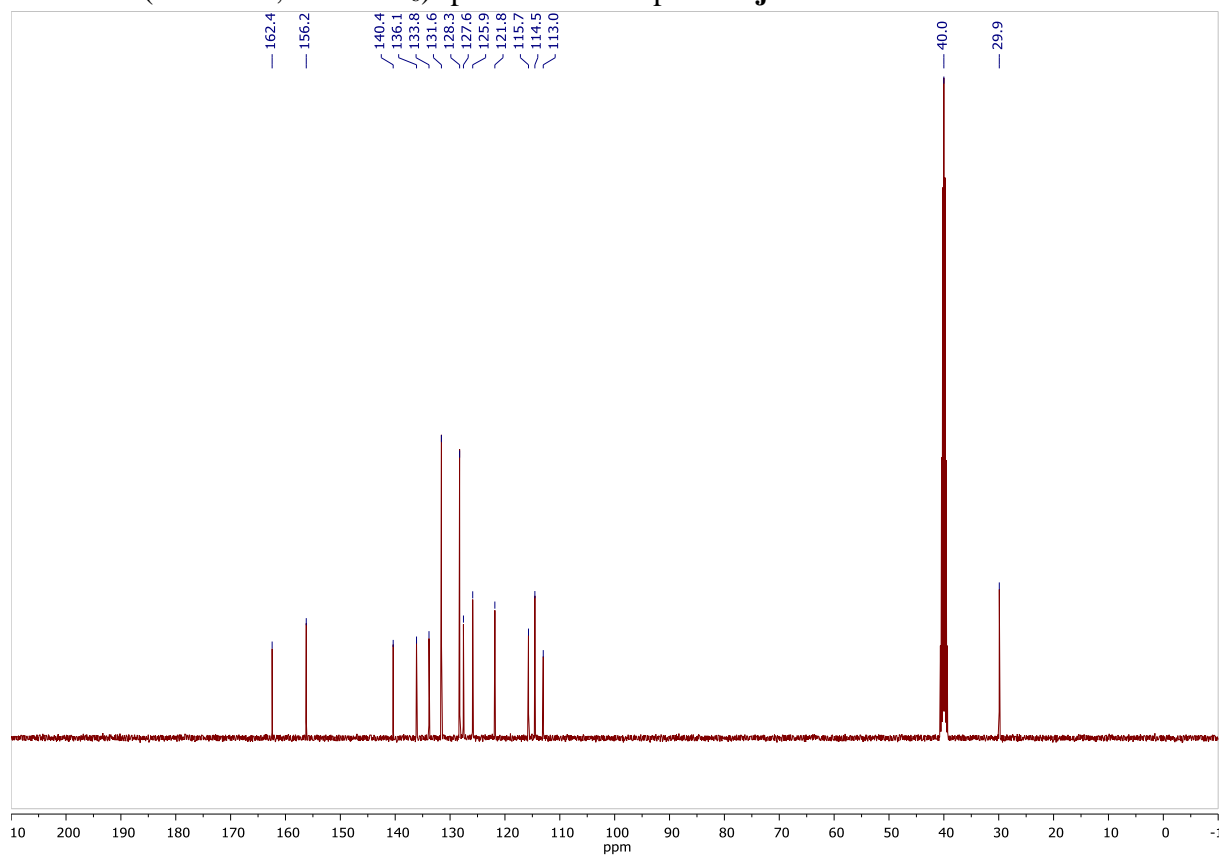

<sup>1</sup>H NMR (400 MHz, DMSO-d<sub>6</sub>) spectrum of compound **1k**

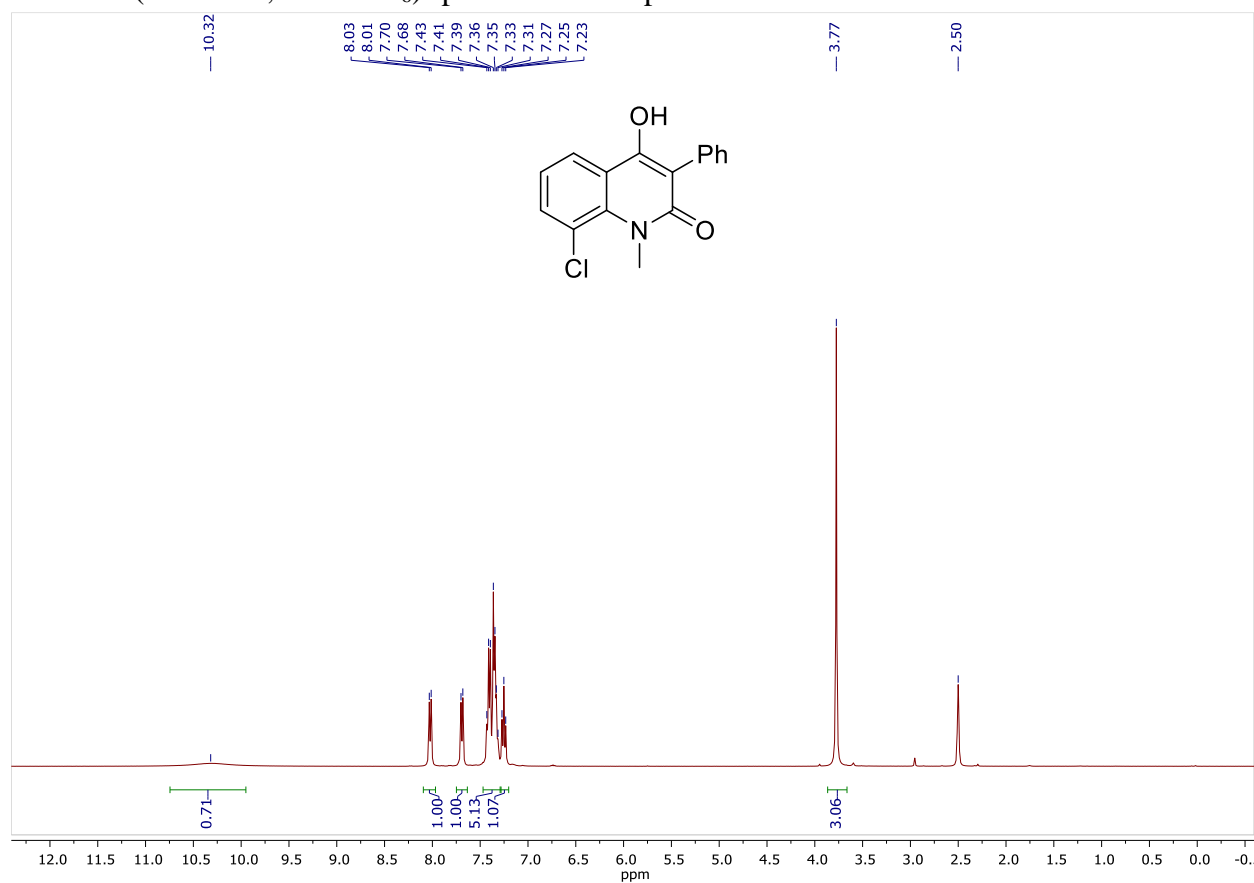

<sup>13</sup>C NMR (100 MHz, DMSO-d<sub>6</sub>) spectrum of compound **1k**

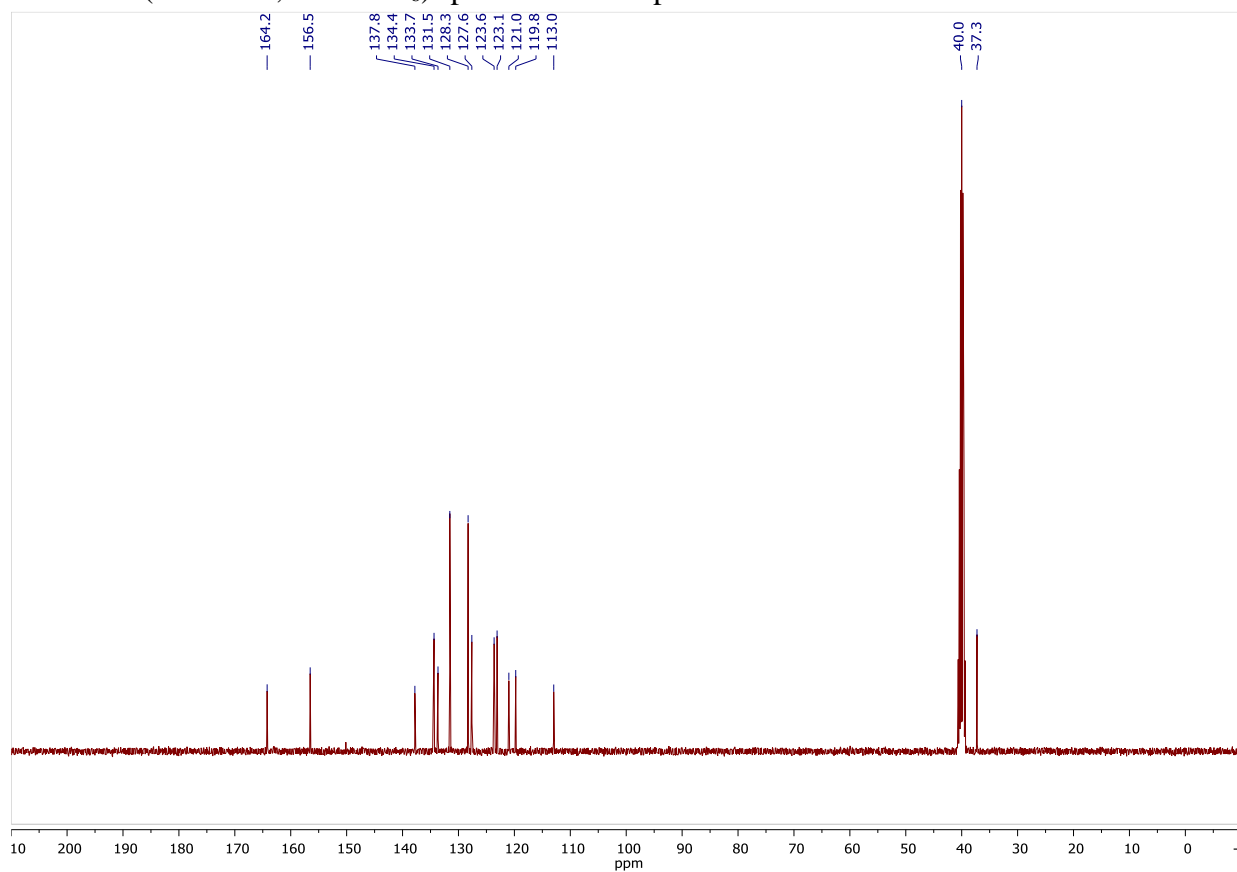

$^1\text{H}$  NMR (400 MHz,  $\text{DMSO-d}_6$ ) spectrum of compound **3a**

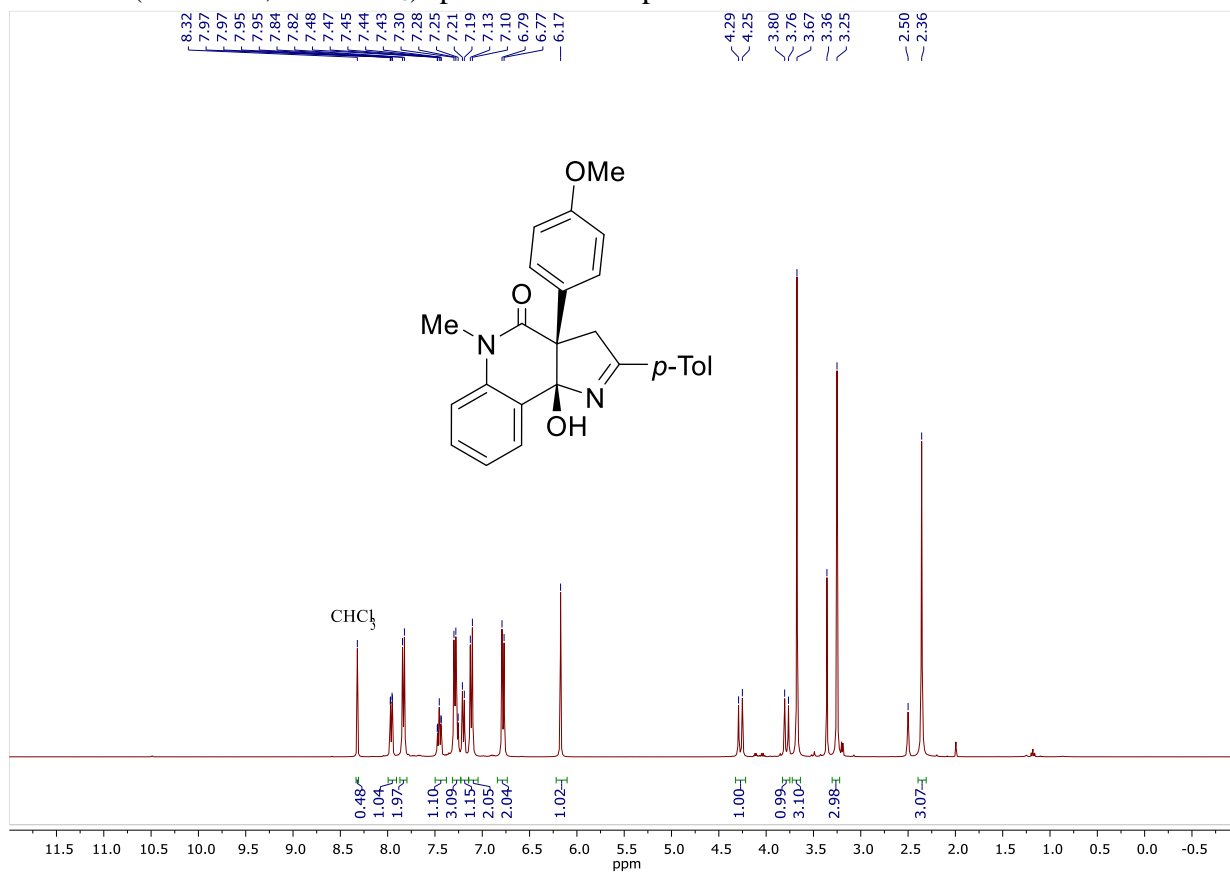

$^{13}\text{C}$  NMR (100 MHz,  $\text{DMSO-d}_6$ ) spectrum of compound **3a**

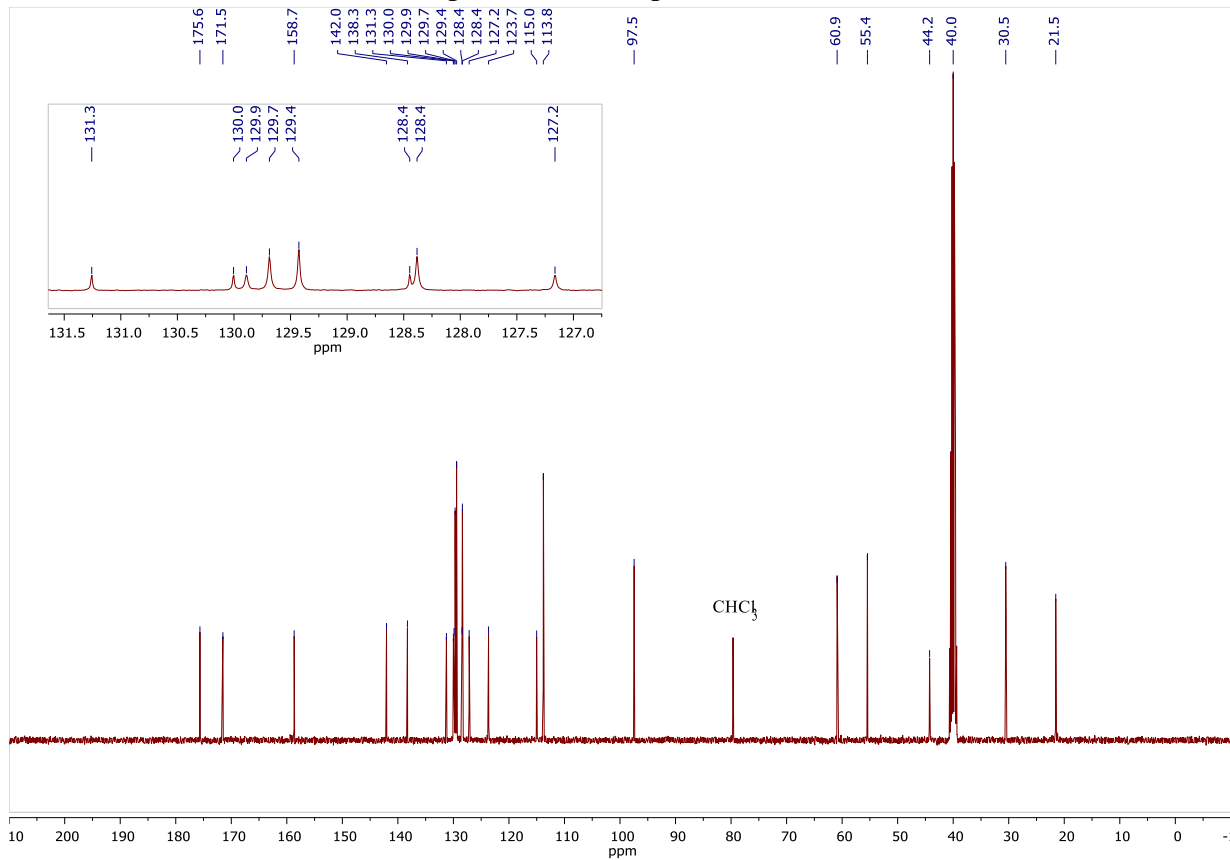

$^1\text{H}$  NMR (400 MHz,  $\text{DMSO-d}_6$ ) spectrum of compound **3b**

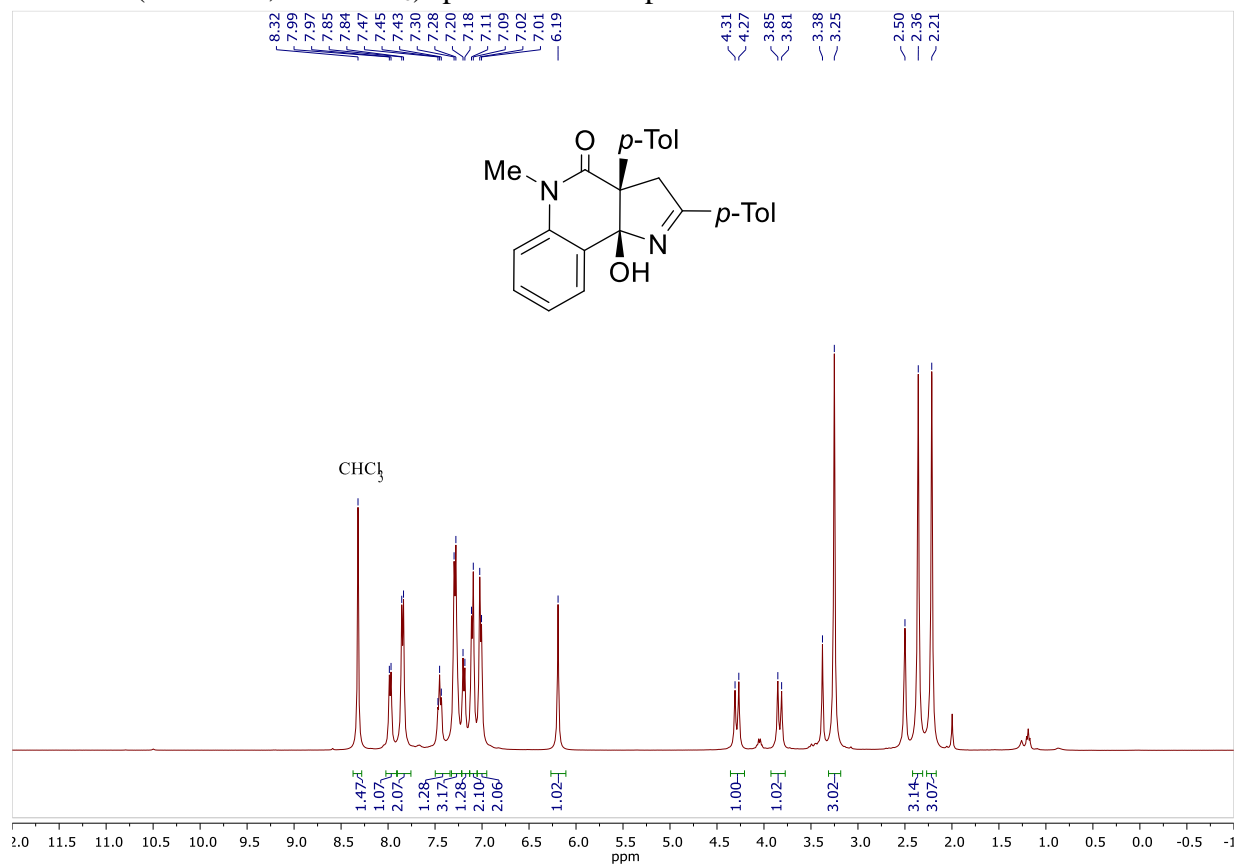

$^{13}\text{C}$  NMR (100 MHz,  $\text{DMSO-d}_6$ ) spectrum of compound **3b**

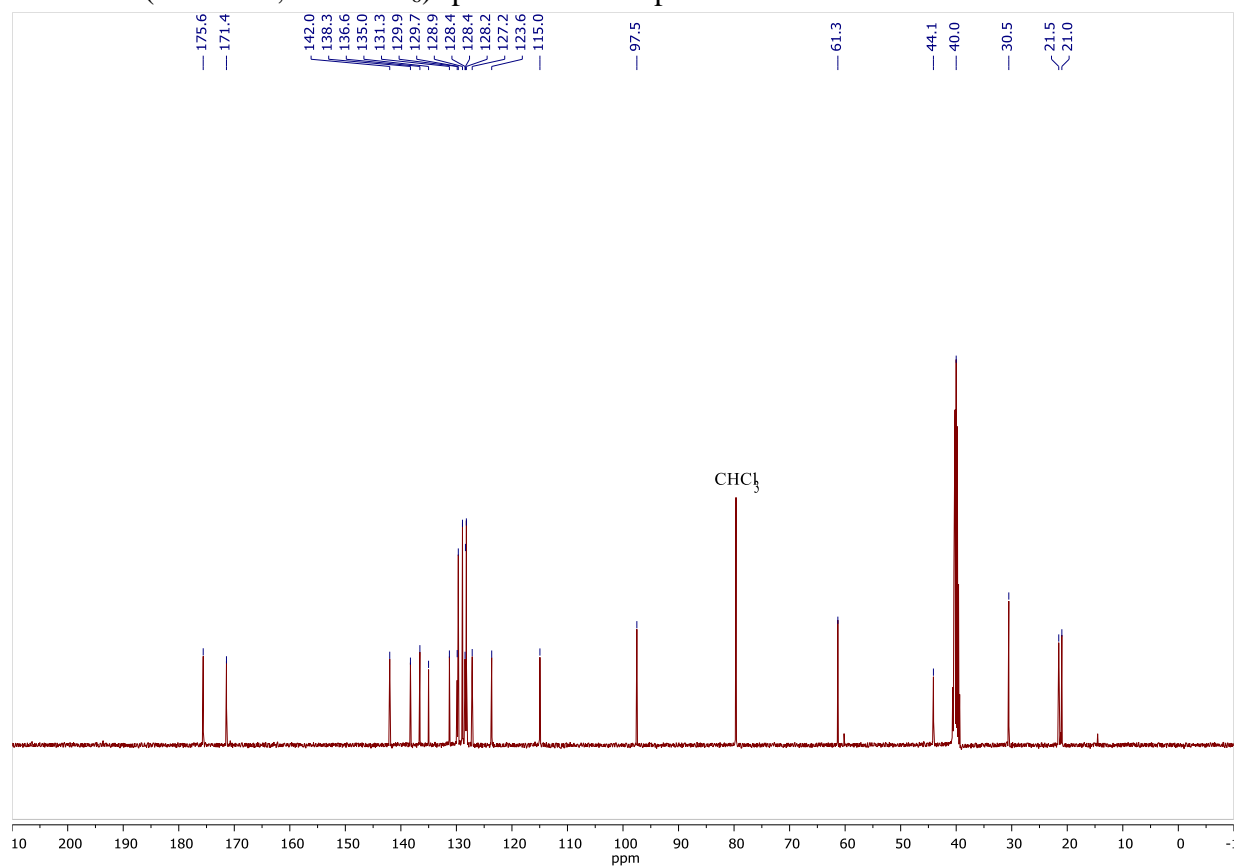

$^1\text{H}$  NMR (400 MHz,  $\text{CDCl}_3$ ) spectrum of compound **3c**

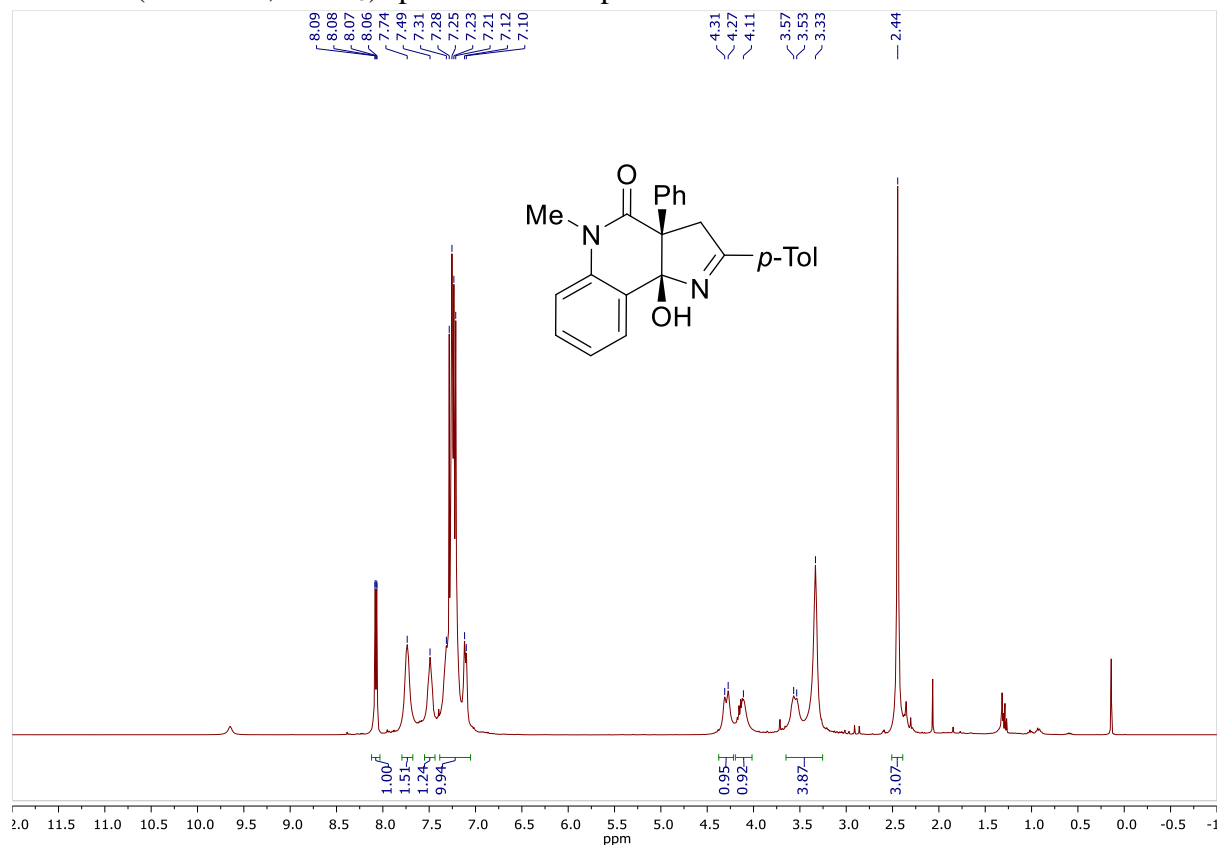

$^{13}\text{C}$  NMR (100 MHz,  $\text{CDCl}_3$ ) spectrum of compound **3c**

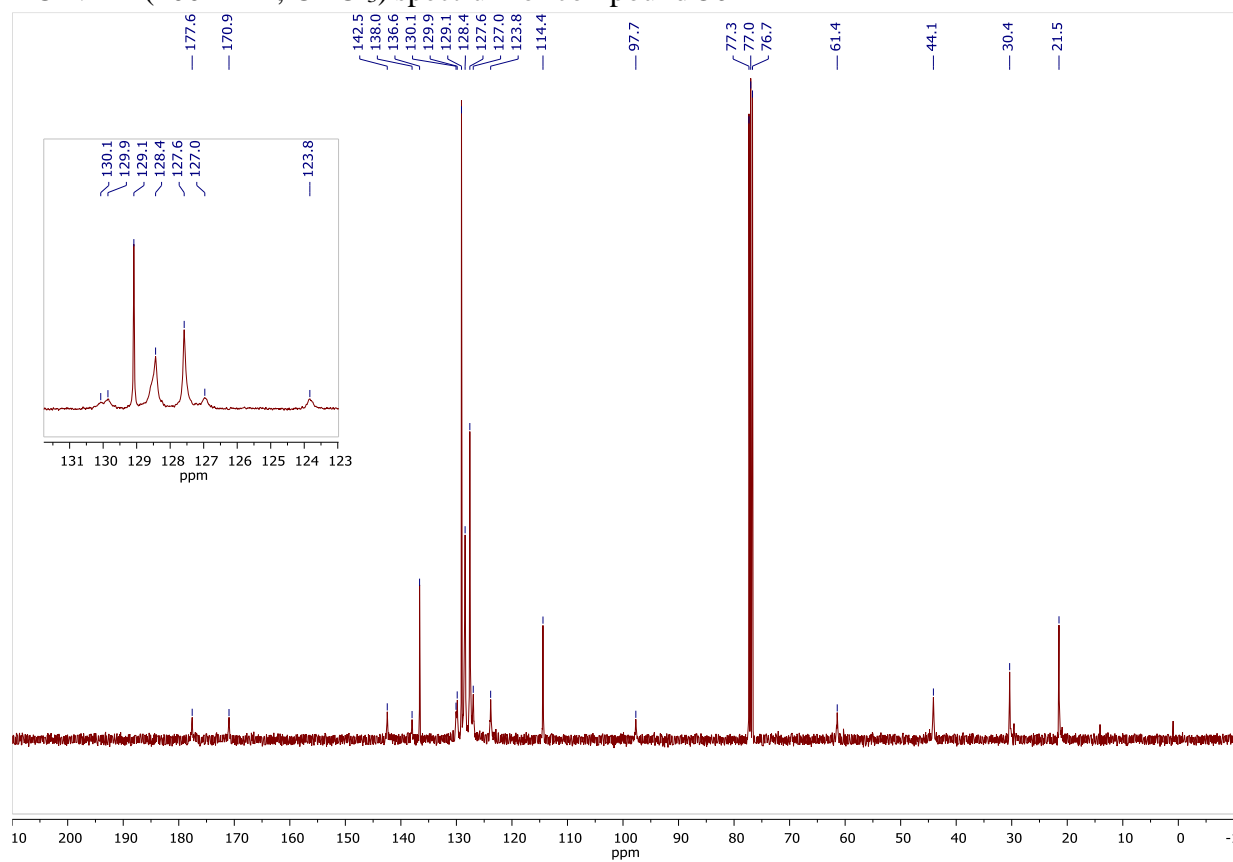

$^1\text{H}$  NMR (400 MHz,  $\text{DMSO-d}_6$ ) spectrum of compound **3d**

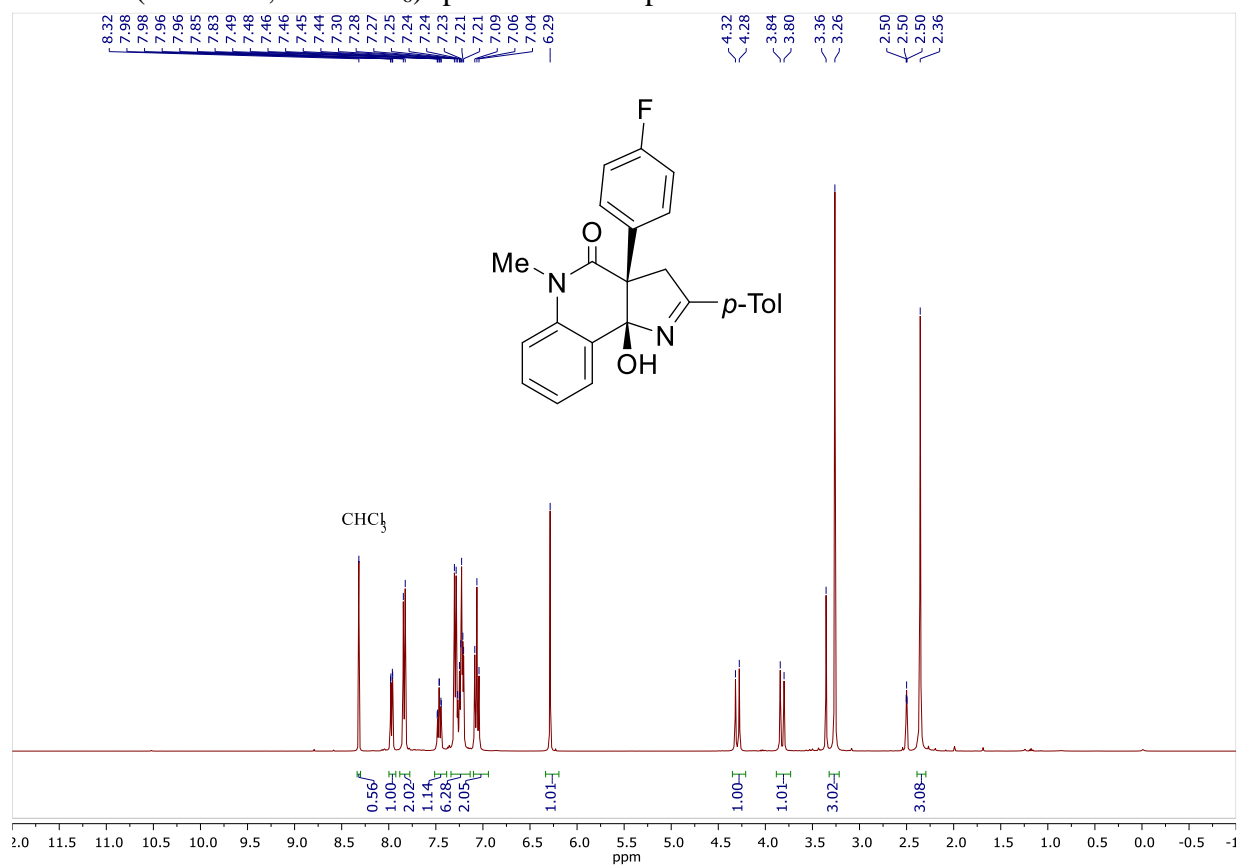

$^{13}\text{C}$  NMR (100 MHz,  $\text{DMSO-d}_6$ ) spectrum of compound **3d**

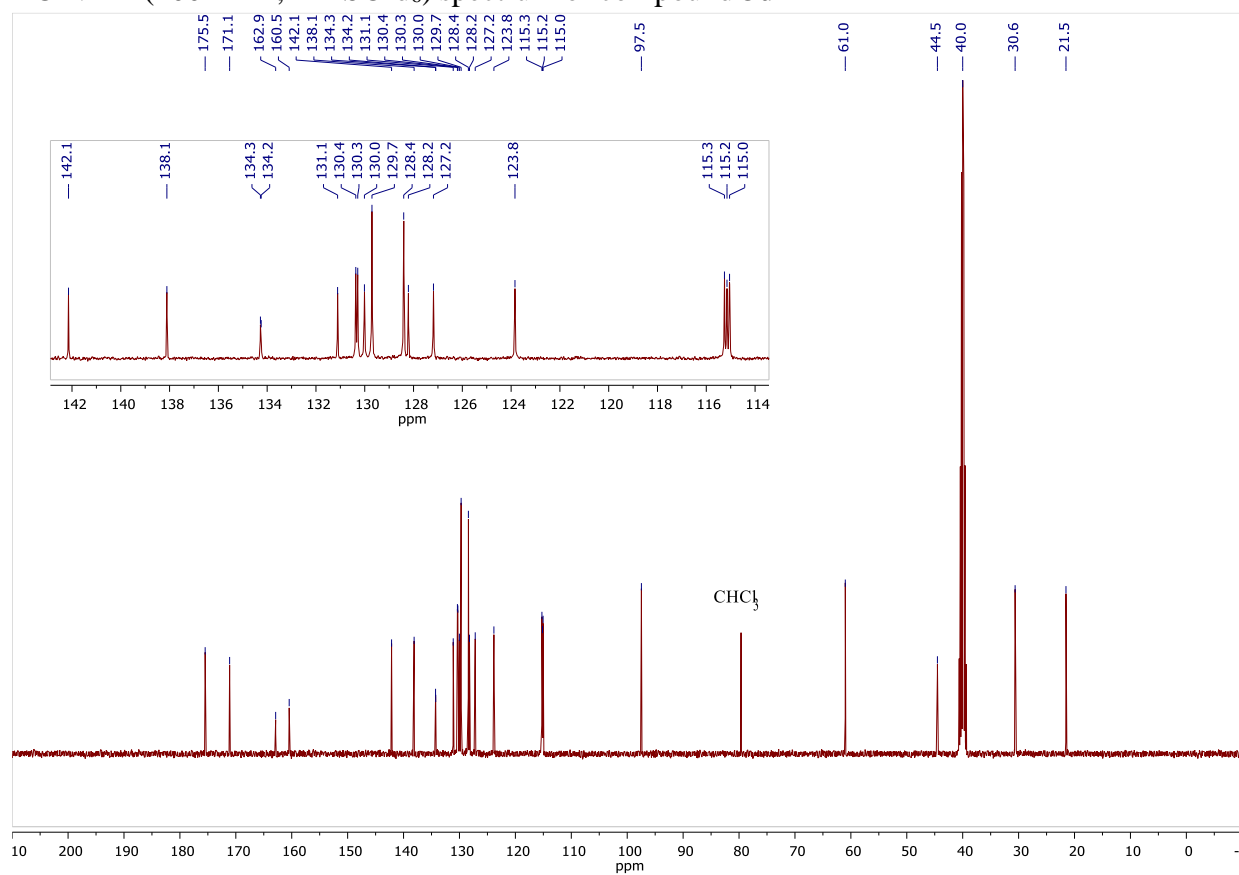

$^1\text{H}$  NMR (400 MHz,  $\text{DMSO-d}_6$ ) spectrum of compound **3e**

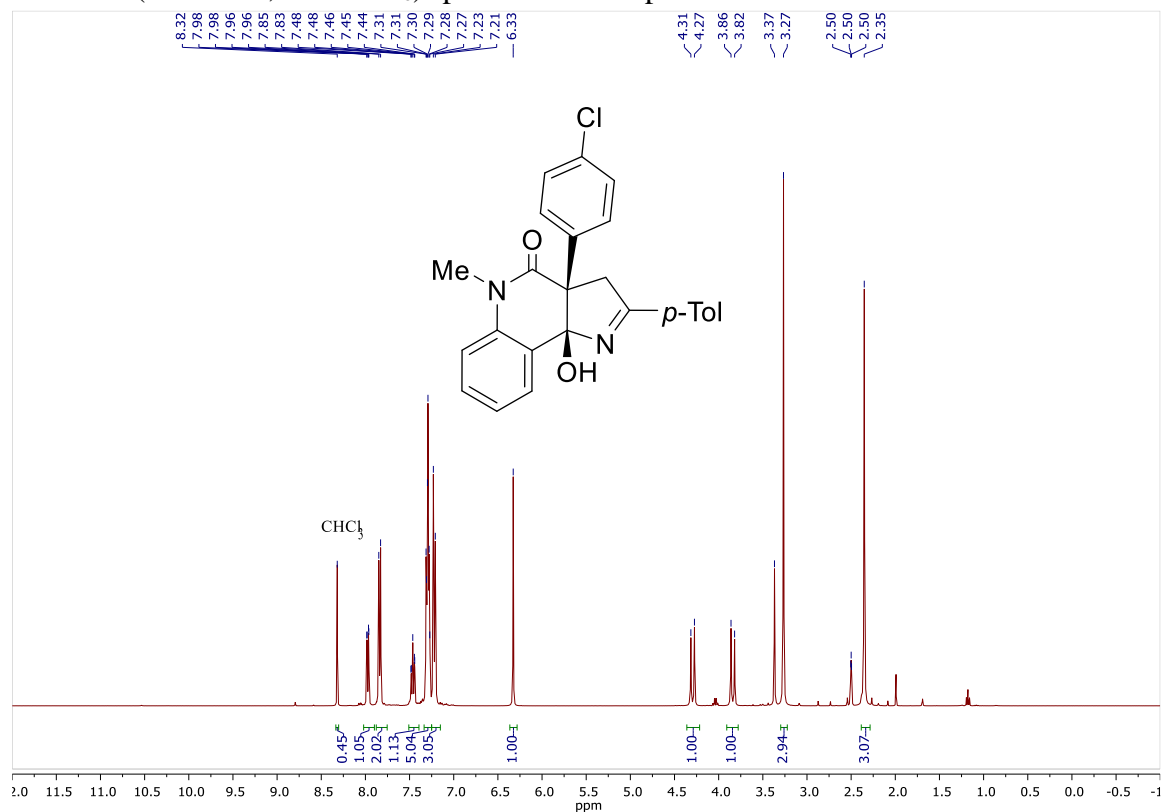

$^{13}\text{C}$  NMR (100 MHz,  $\text{DMSO-d}_6$ ) spectrum of compound **3e**

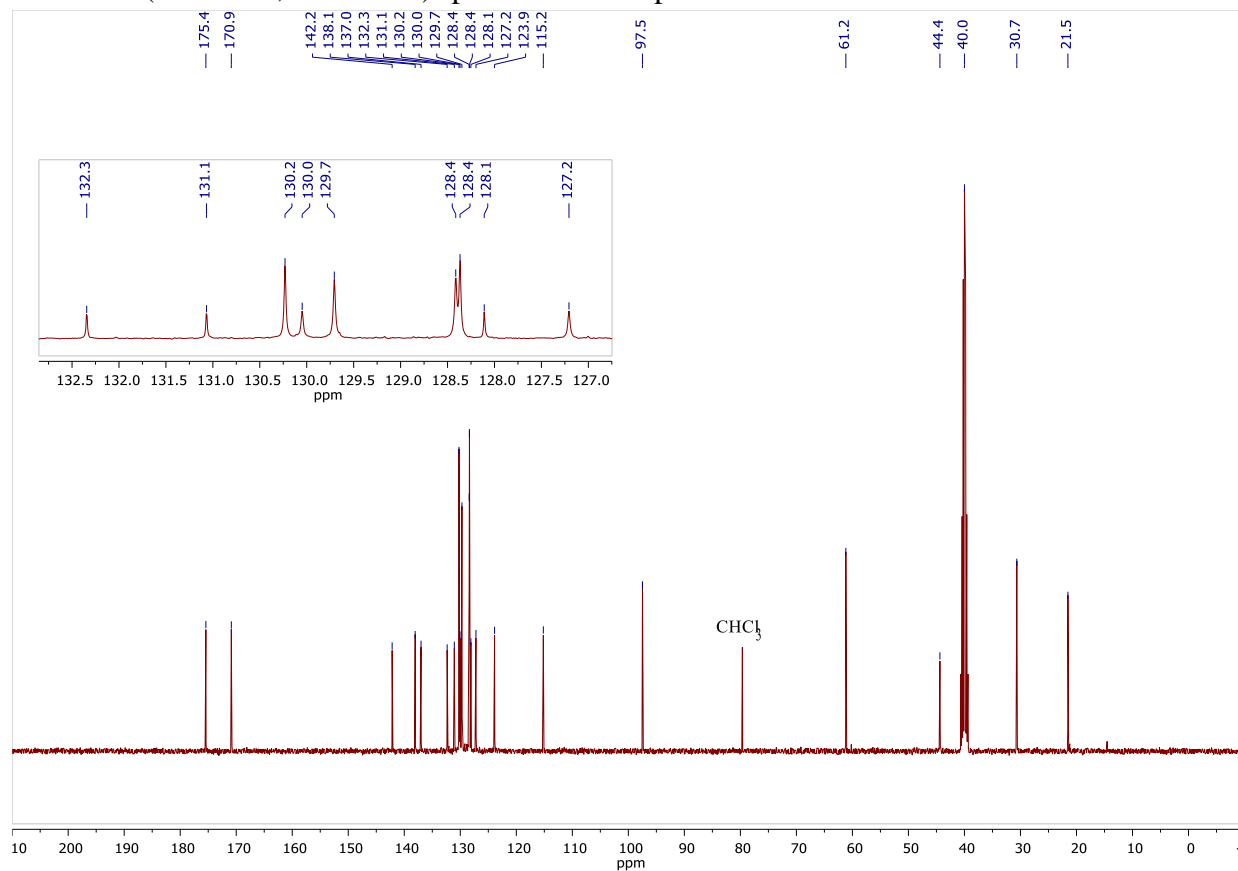

$^1\text{H}$  NMR (400 MHz,  $\text{DMSO-d}_6$ ) spectrum of compound **3f**

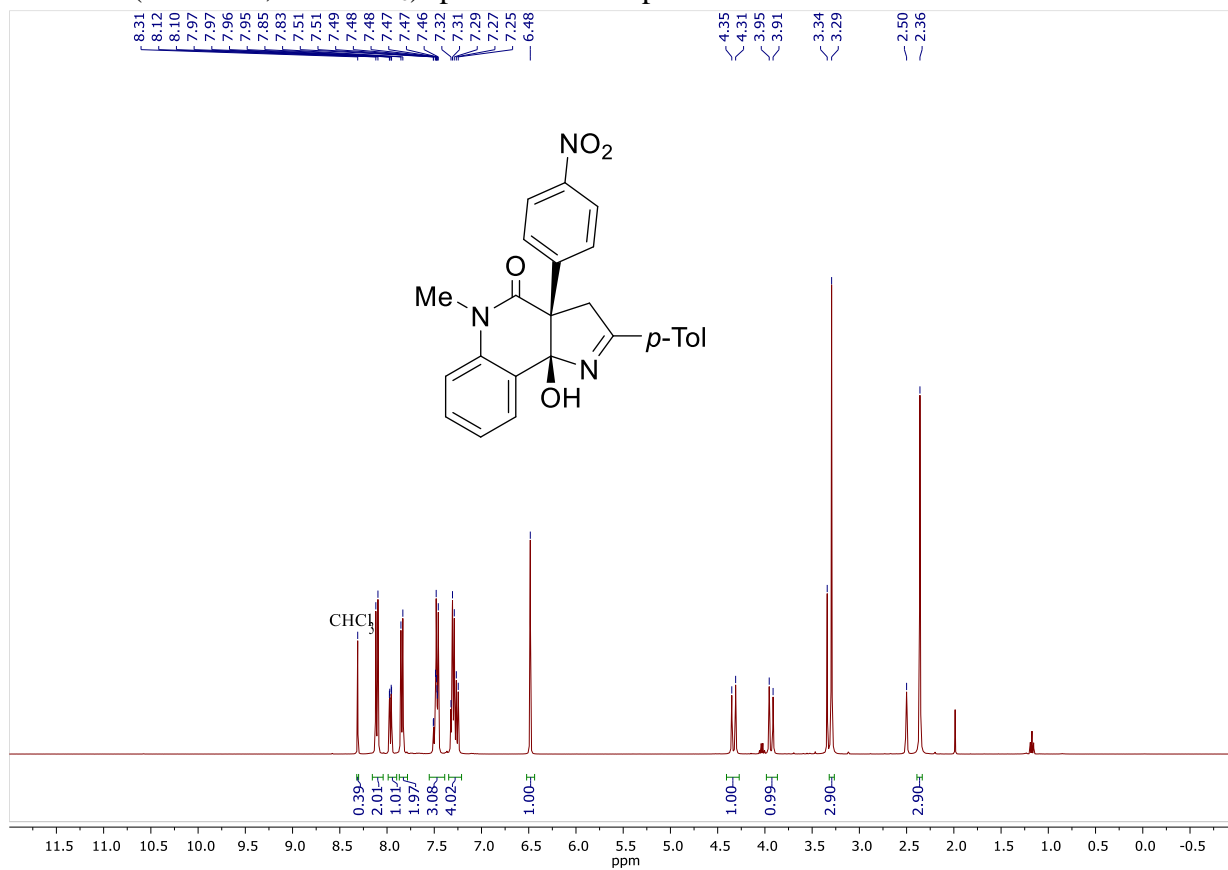

$^{13}\text{C}$  NMR (100 MHz,  $\text{DMSO-d}_6$ ) spectrum of compound **3f**

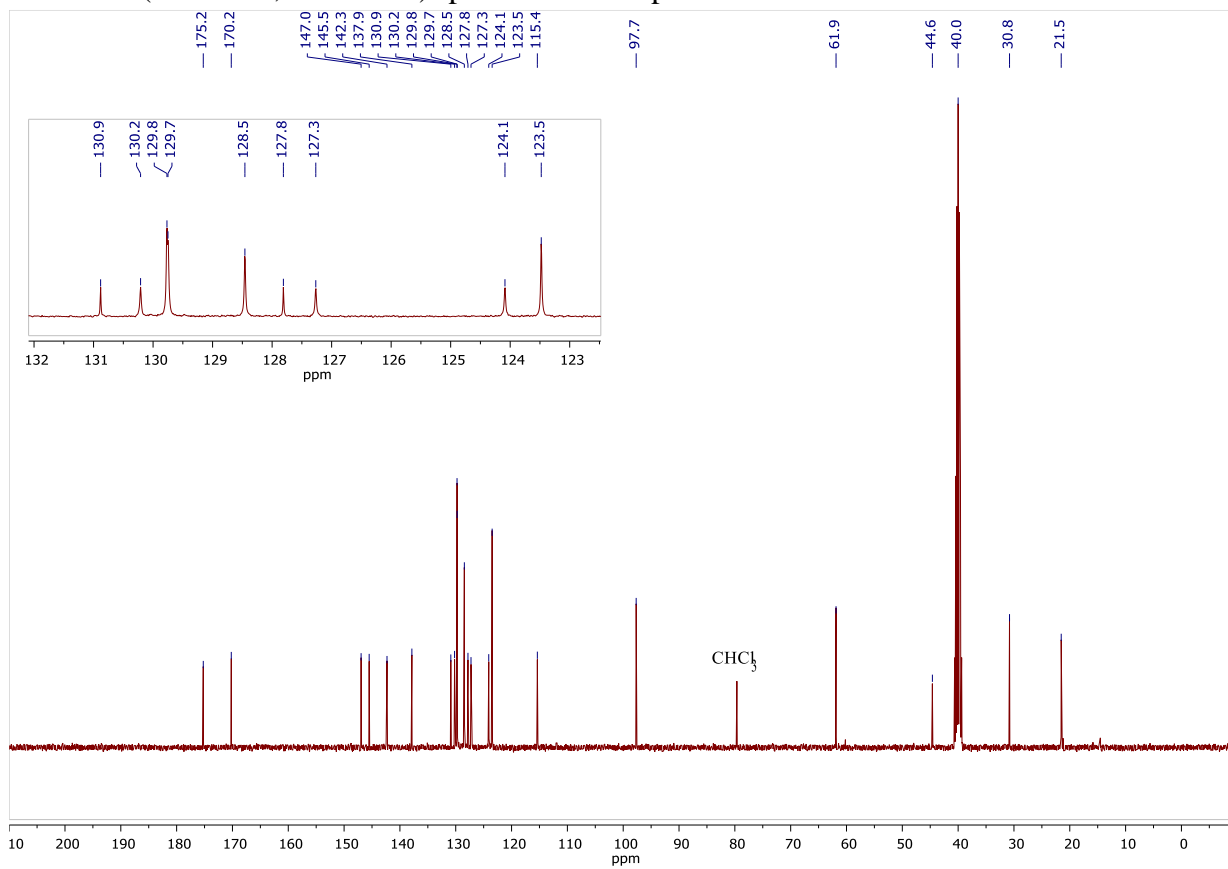



$^1\text{H}$  NMR (400 MHz,  $\text{DMSO-d}_6$ ) spectrum of compound **3g**

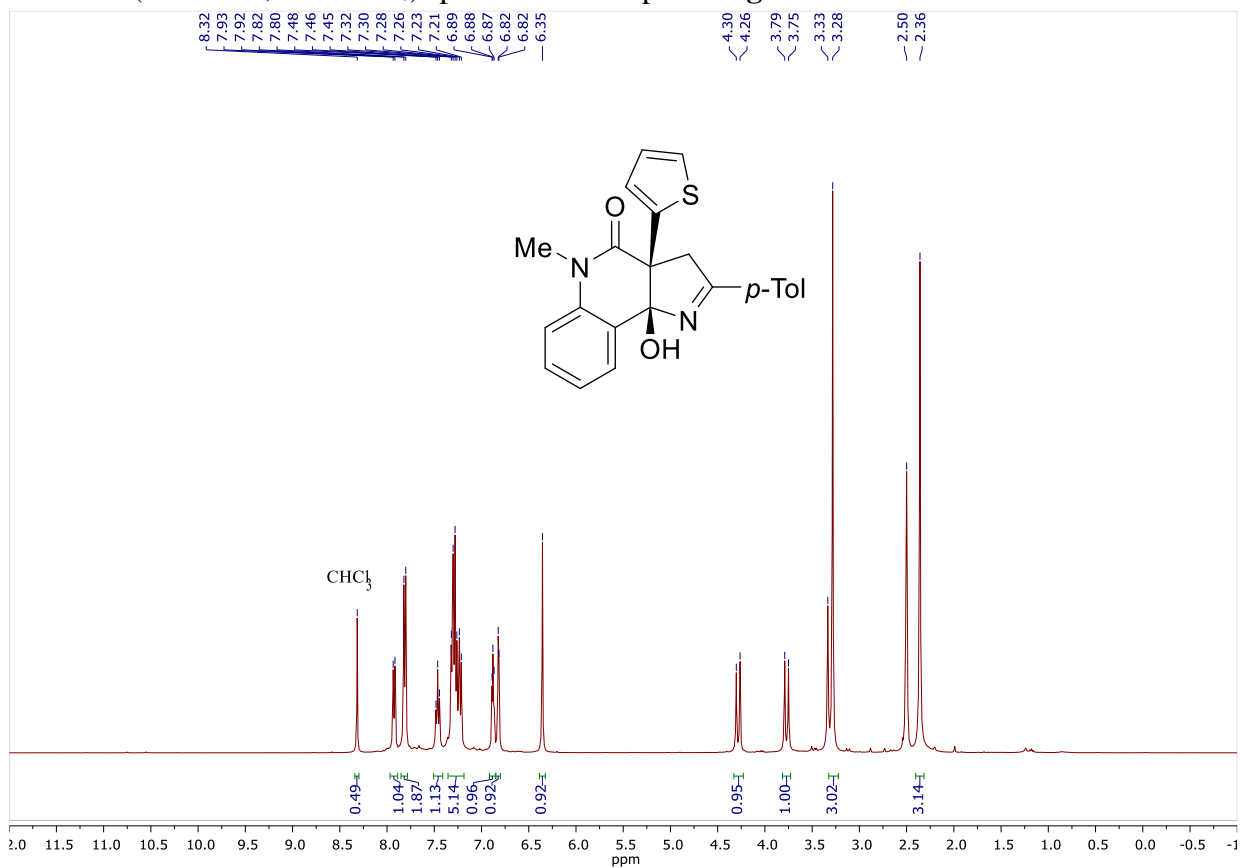

$^{13}\text{C}$  NMR (100 MHz,  $\text{DMSO-d}_6$ ) spectrum of compound **3g**

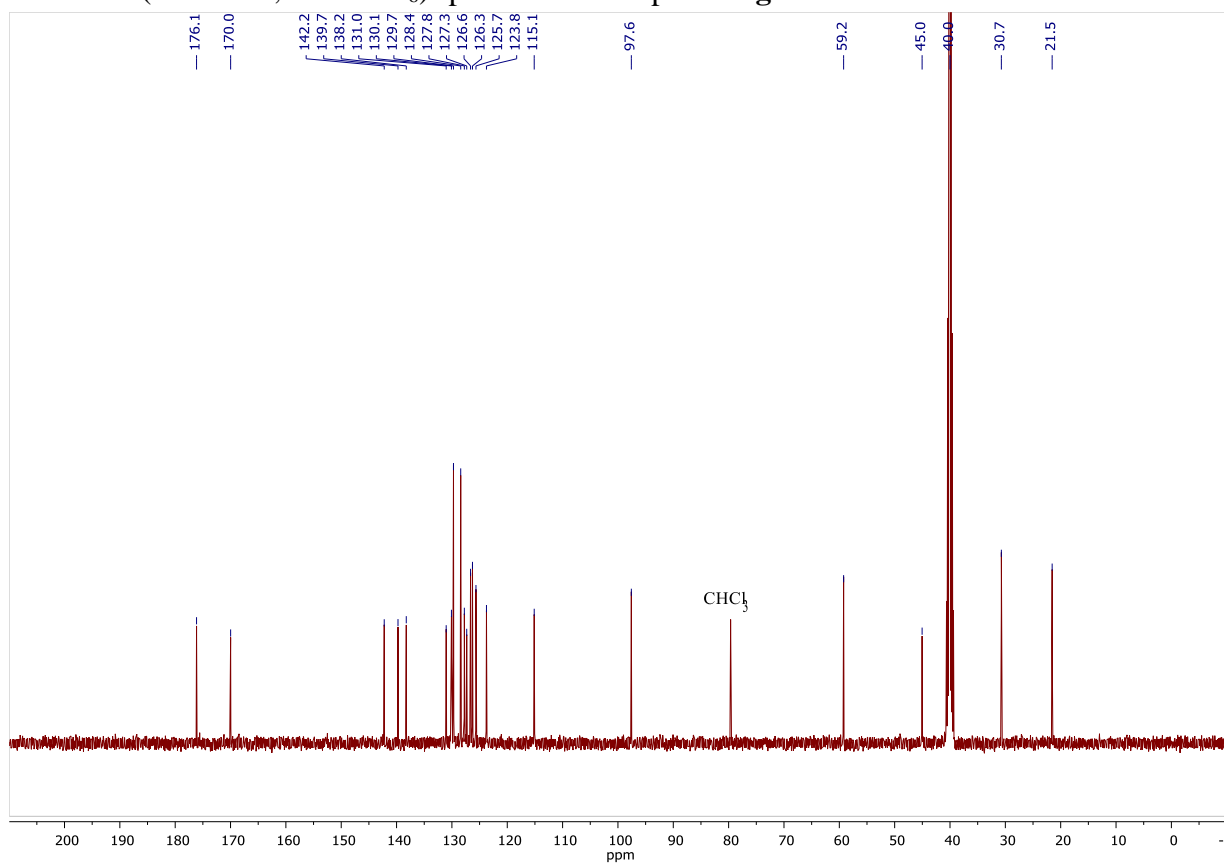

$^1\text{H}$  NMR (400 MHz,  $\text{DMSO-d}_6$ ) spectrum of compound **3h**

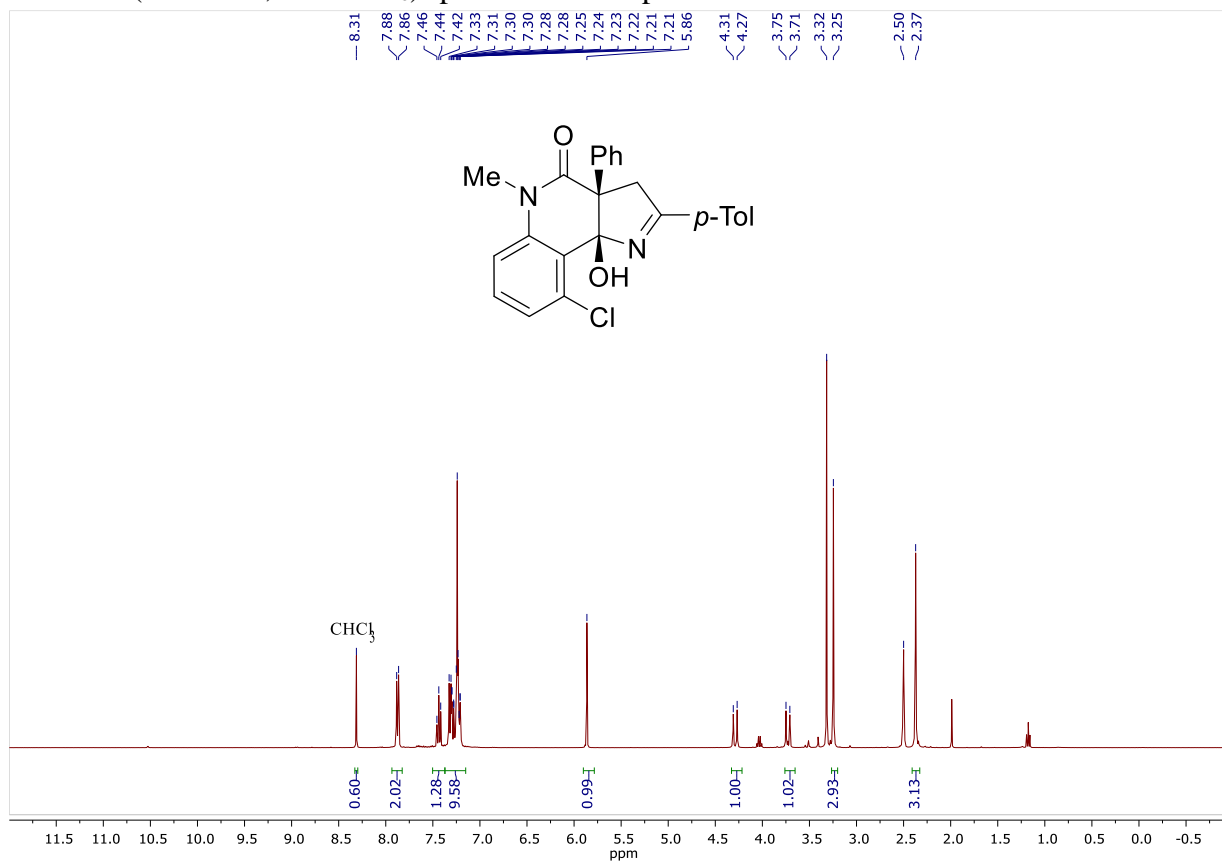

$^{13}\text{C}$  NMR (100 MHz,  $\text{DMSO-d}_6$ ) spectrum of compound **3h**

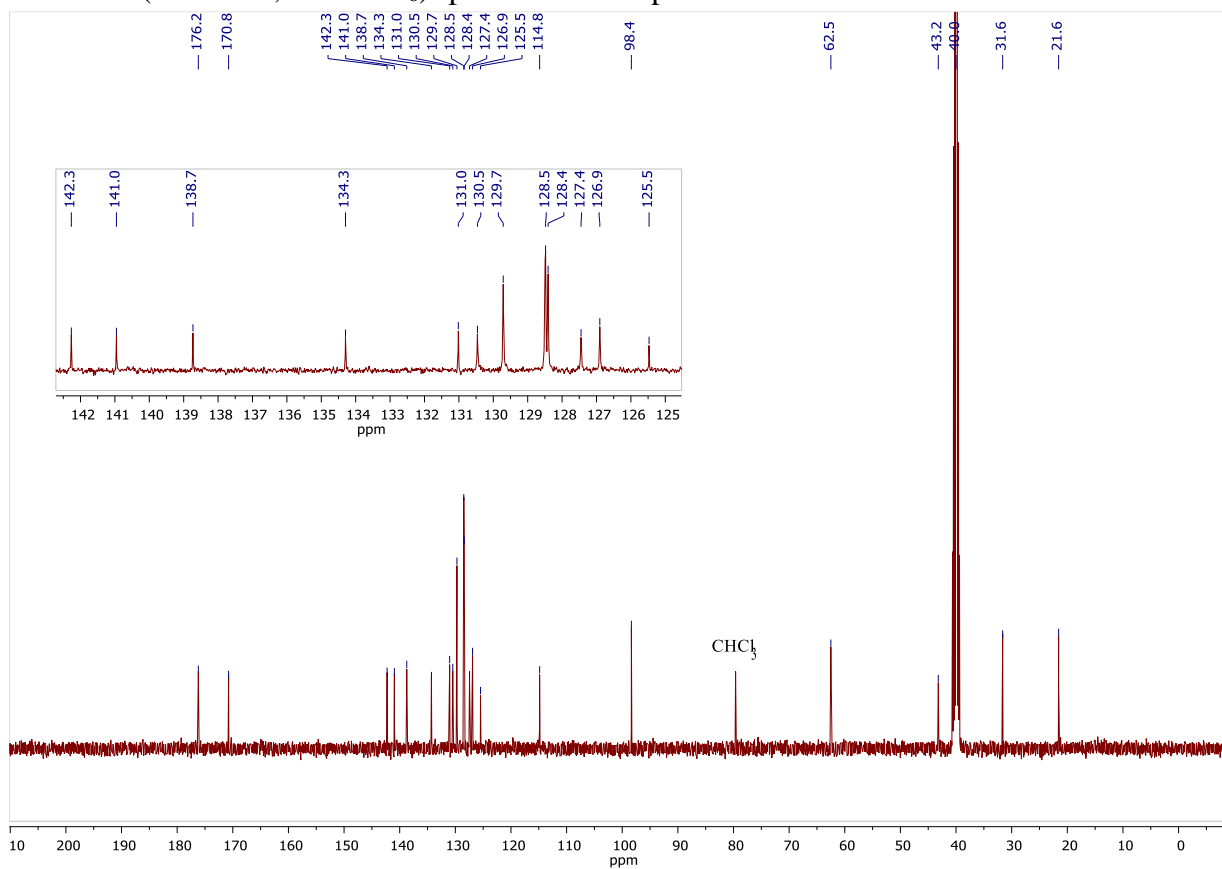

<sup>1</sup>H NMR (400 MHz, DMSO-d<sub>6</sub>) spectrum of compound **3i**

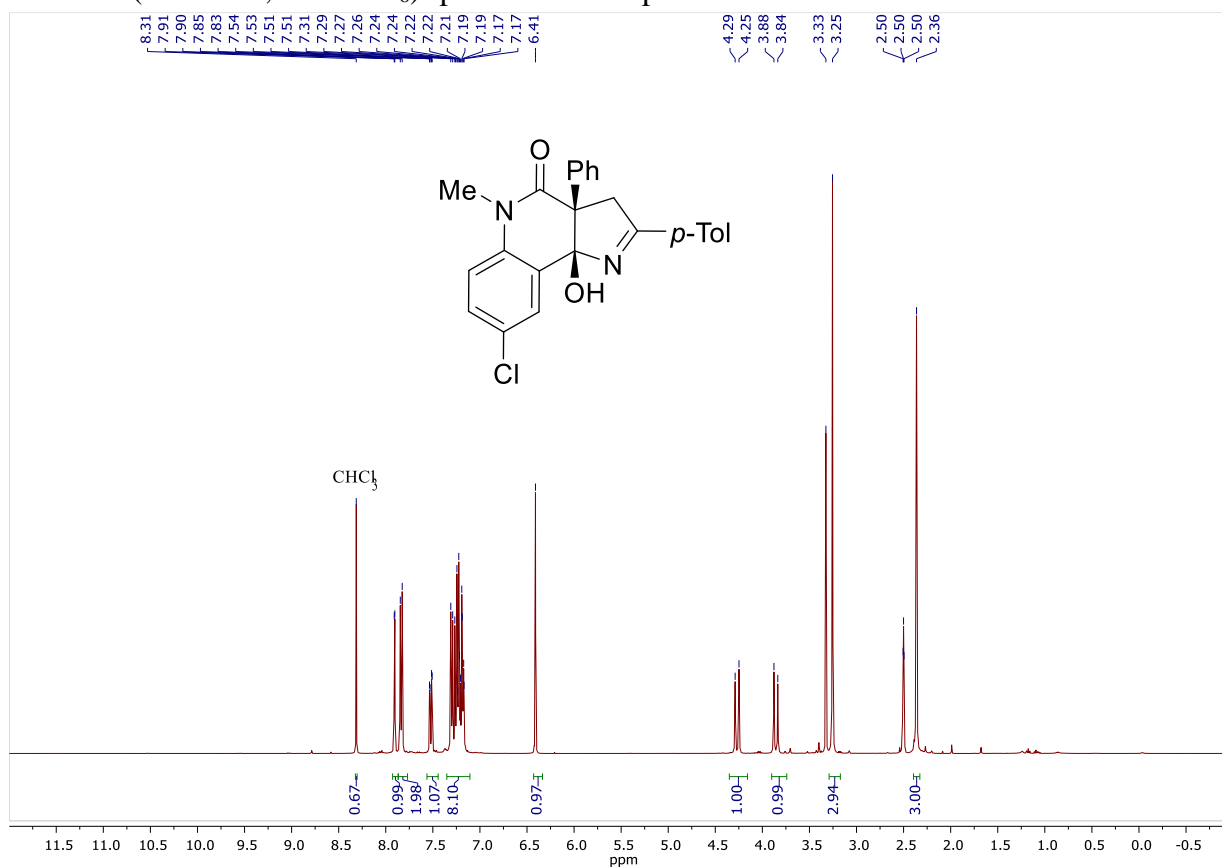

<sup>13</sup>C NMR (100 MHz, DMSO-d<sub>6</sub>) spectrum of compound **3i**

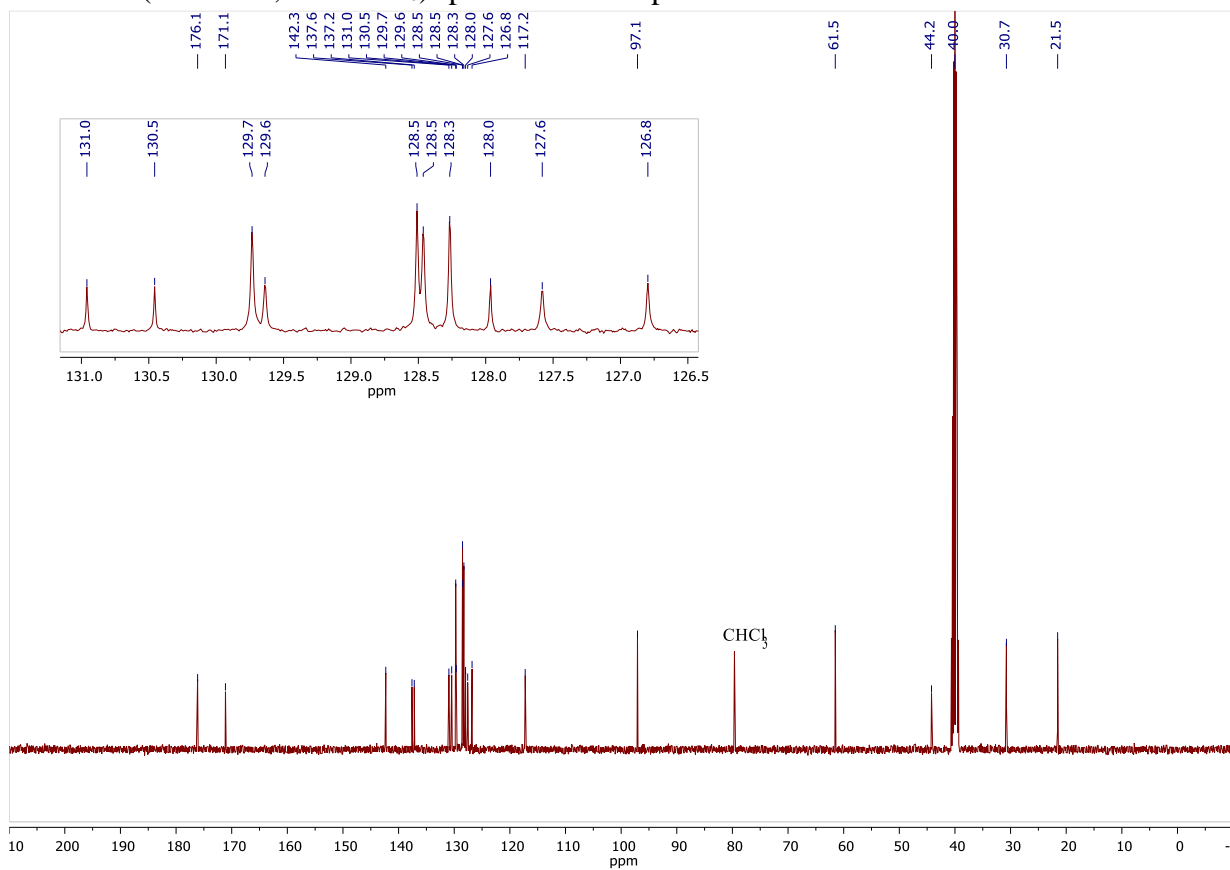

$^1\text{H}$  NMR (400 MHz,  $\text{DMSO-d}_6$ ) spectrum of compound **3i** prepared by evaporation of  $\text{DMSO-d}_6$  solution of solvate **3i** with  $\text{CHCl}_3$

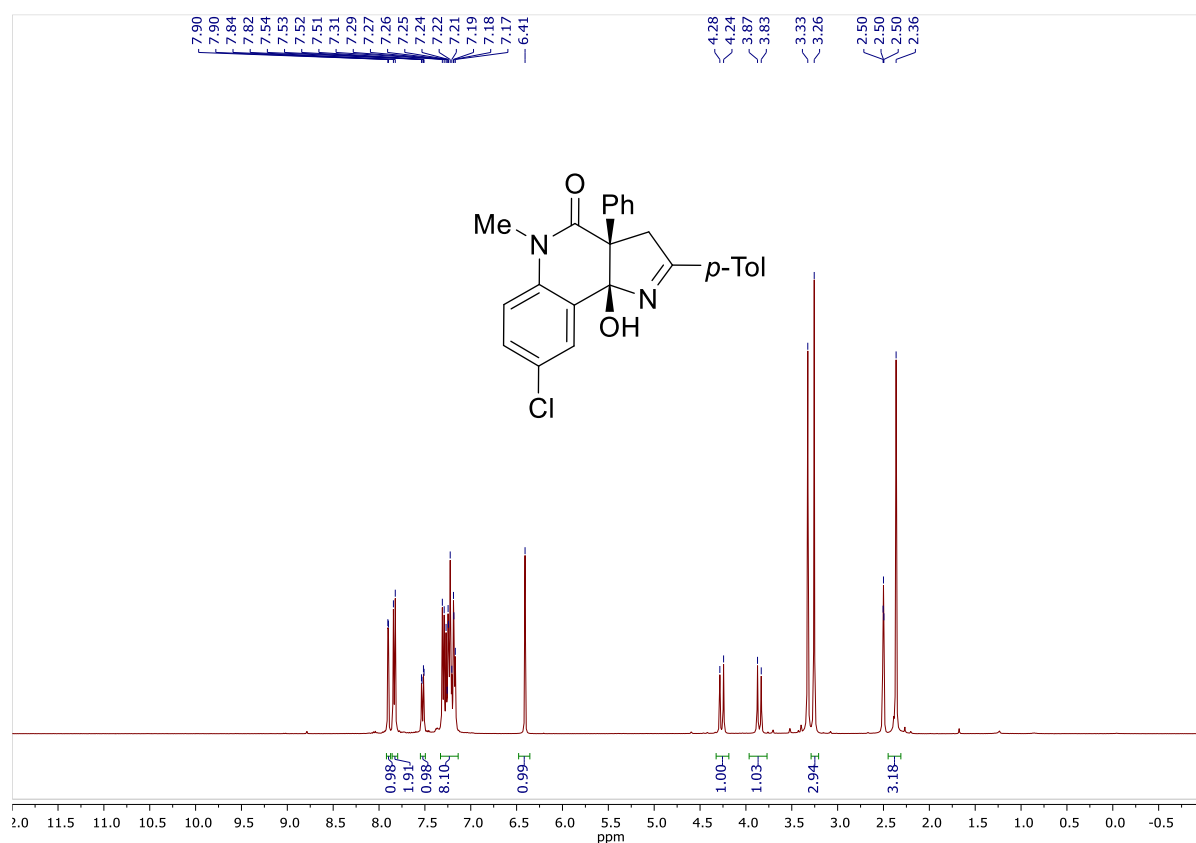

$^{13}\text{C}$  NMR (100 MHz,  $\text{DMSO-d}_6$ ) spectrum of compound **3i** prepared by evaporation of  $\text{DMSO-d}_6$  solution of solvate **3i** with  $\text{CHCl}_3$

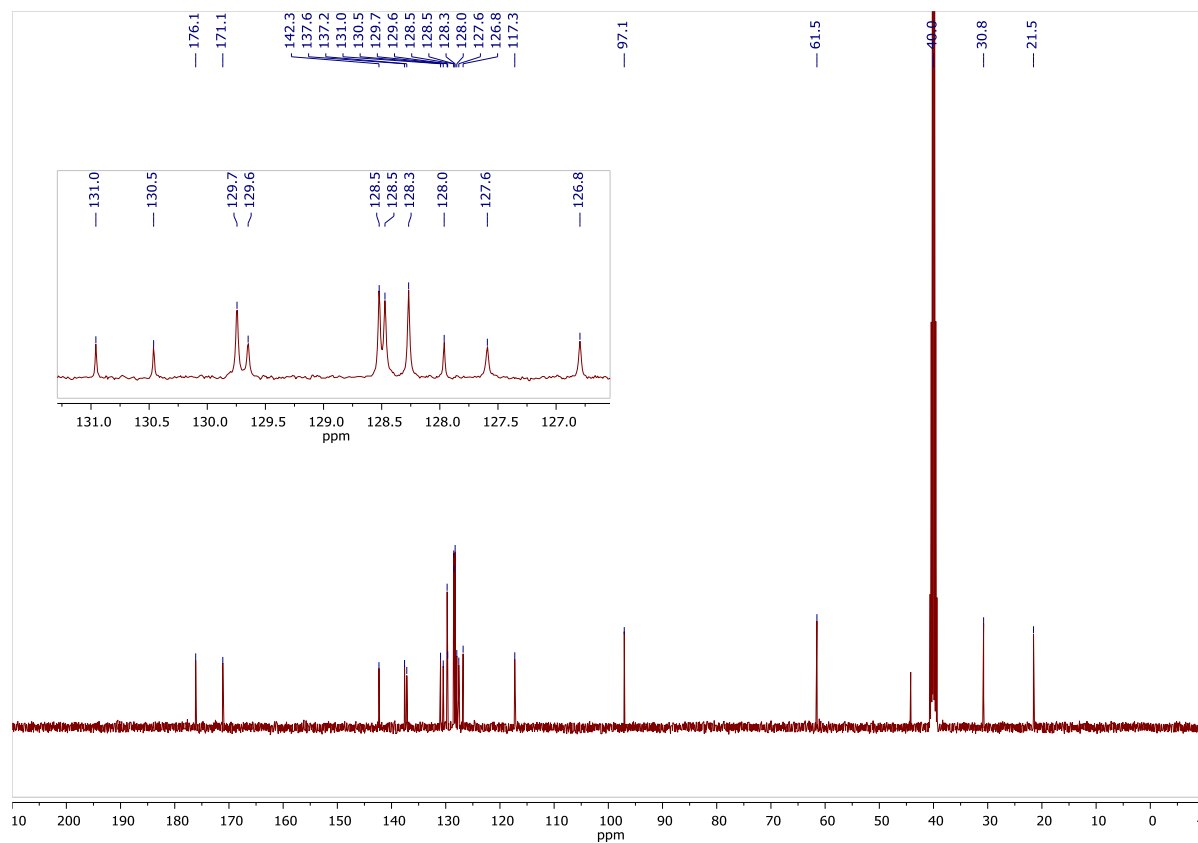

$^1\text{H}$  NMR (400 MHz,  $\text{DMSO-d}_6$ ) spectrum of compound **3j**

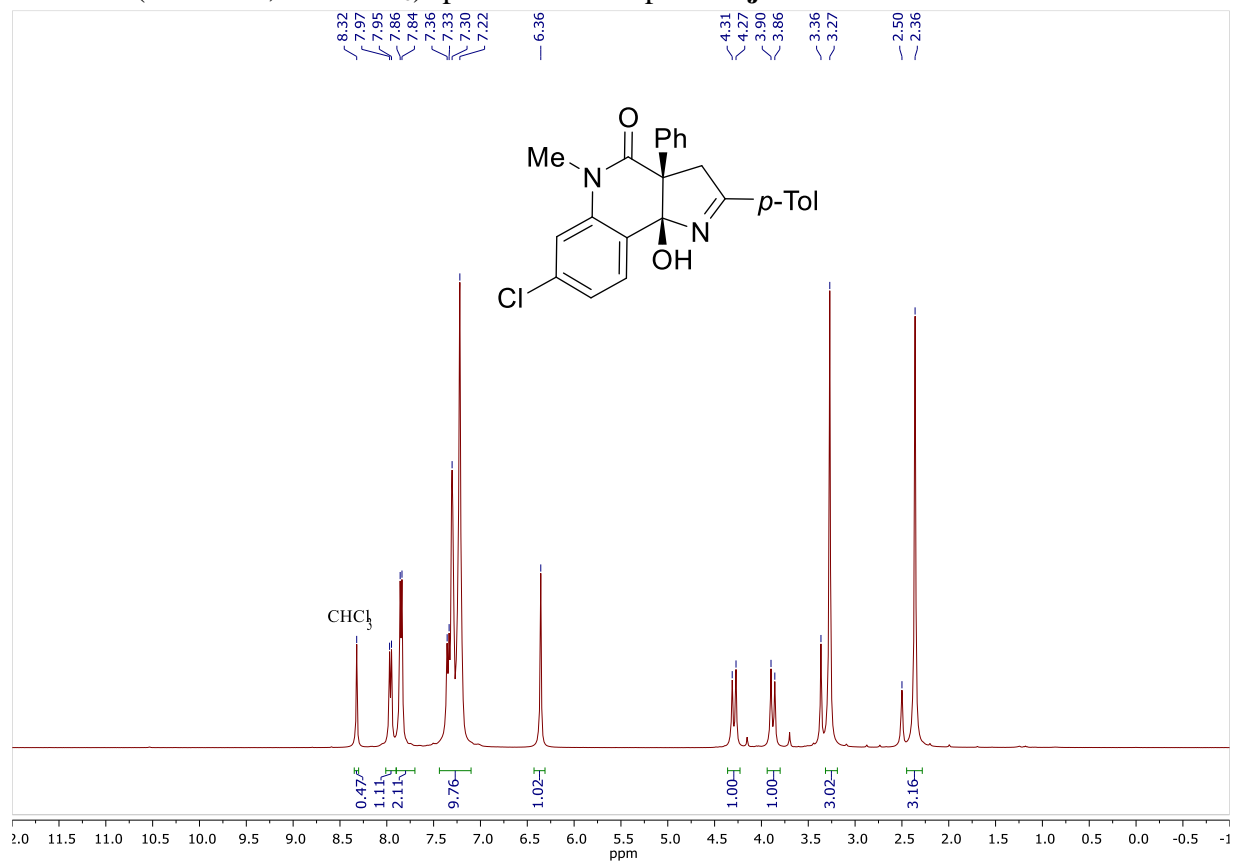

$^{13}\text{C}$  NMR (100 MHz,  $\text{DMSO-d}_6$ ) spectrum of compound **3j**

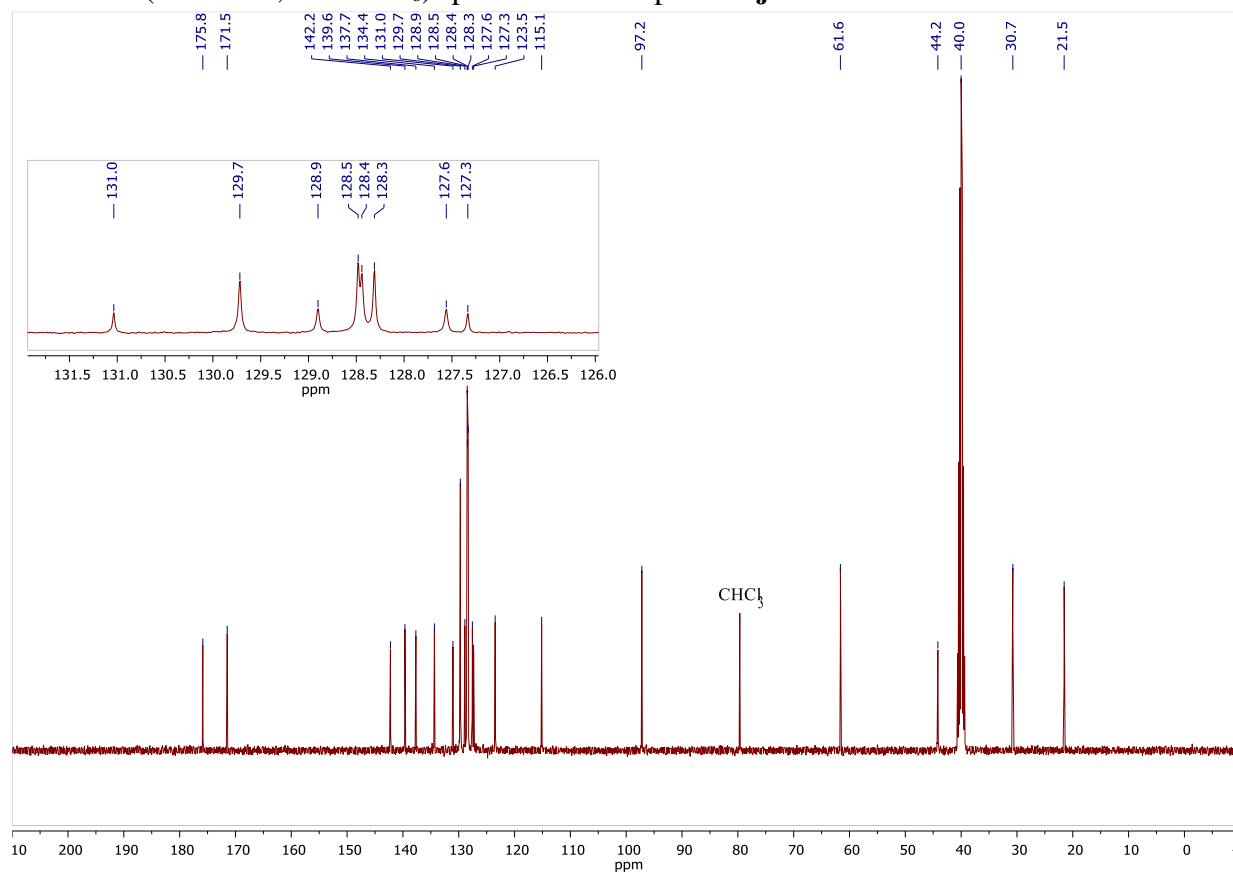

$^1\text{H}$  NMR (400 MHz,  $\text{DMSO-d}_6$ ) spectrum of compound **3k**

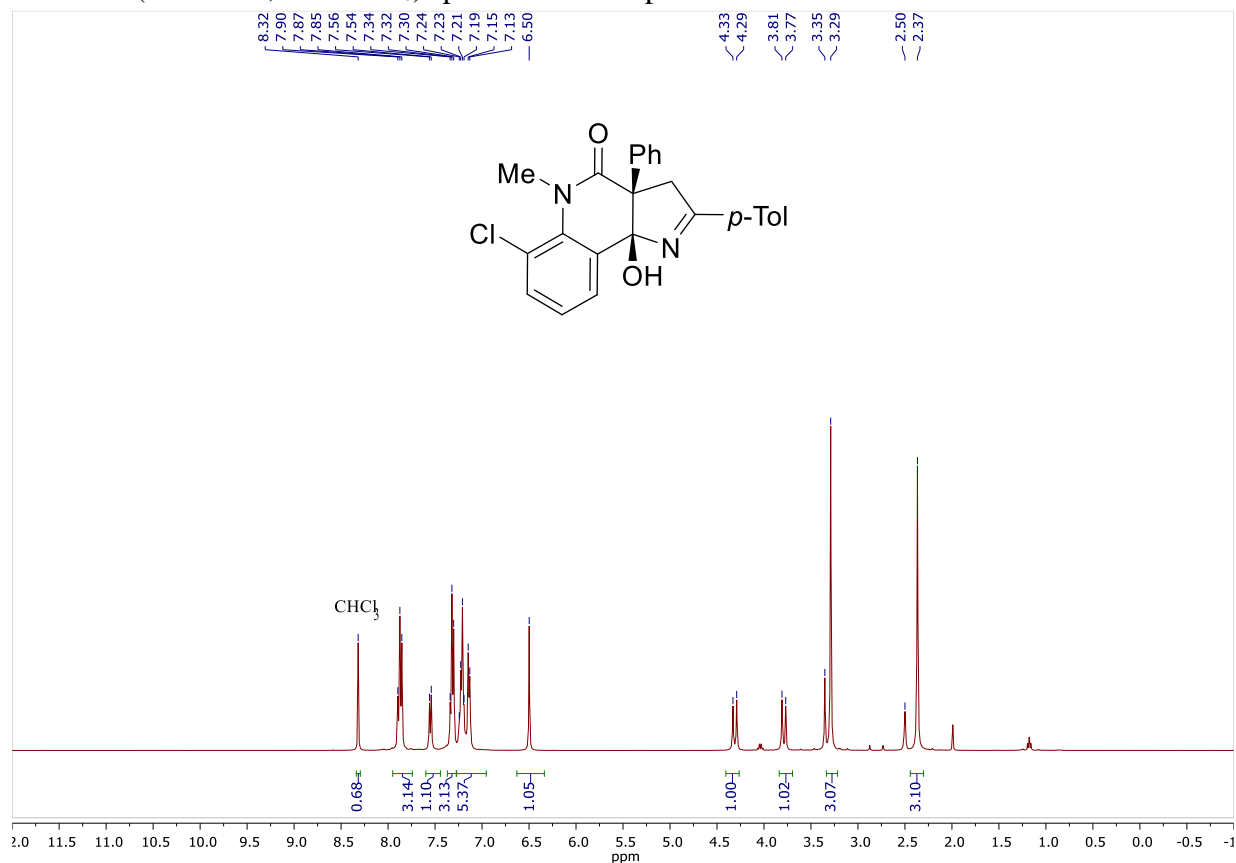

$^{13}\text{C}$  NMR (100 MHz,  $\text{DMSO-d}_6$ ) spectrum of compound **3k**

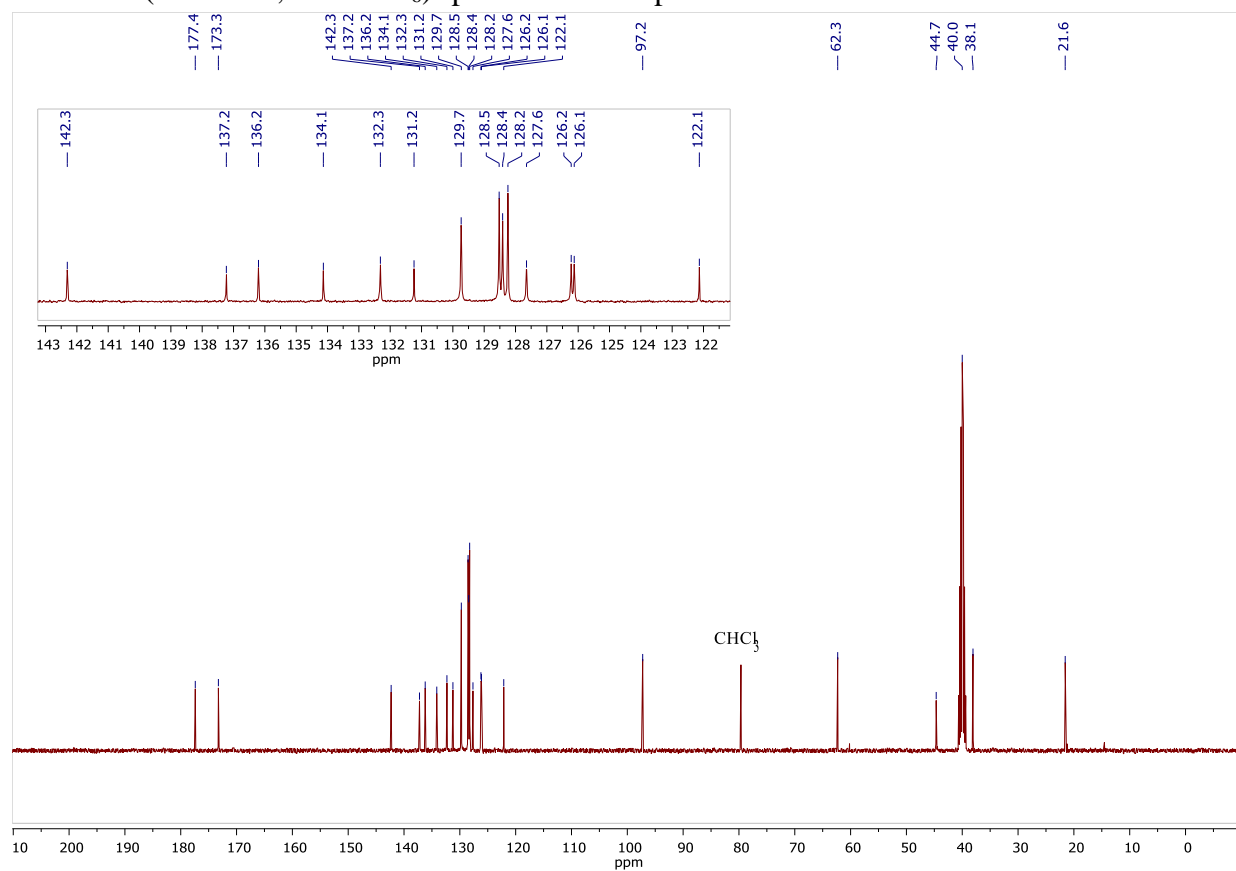

<sup>1</sup>H NMR (400 MHz, DMSO-d<sub>6</sub>) spectrum of compound **3l**

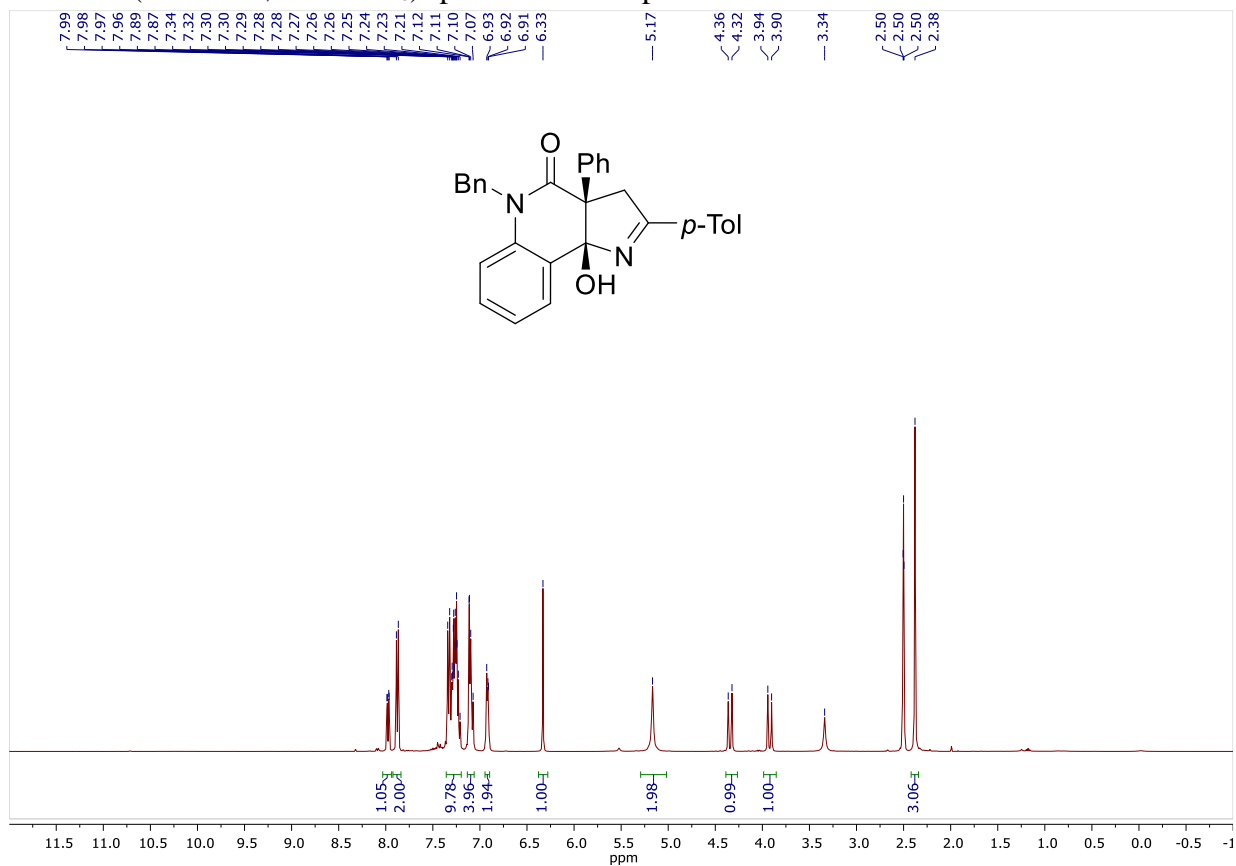

<sup>13</sup>C NMR (100 MHz, DMSO-d<sub>6</sub>) spectrum of compound **3l**

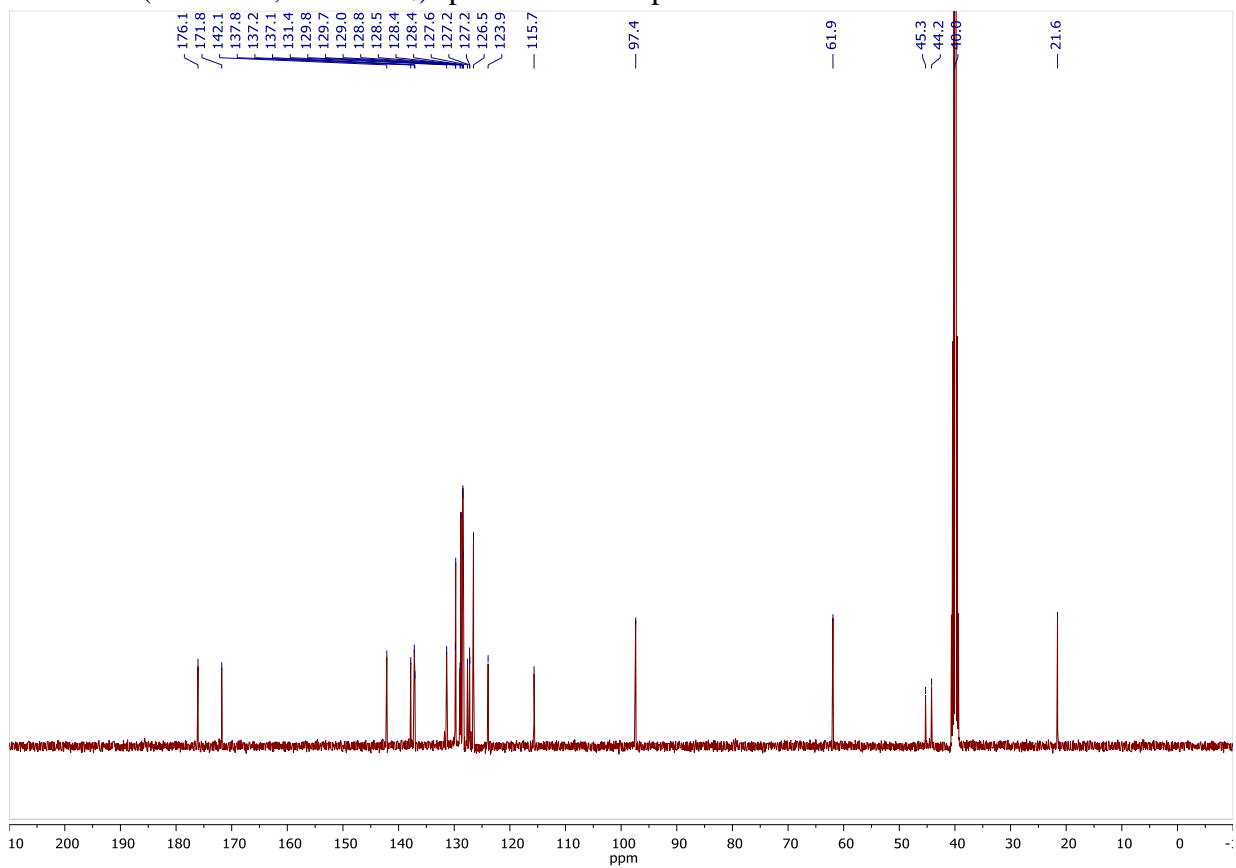

$^1\text{H}$  NMR (400 MHz,  $\text{DMSO-d}_6$ ) spectrum of compound **3m**

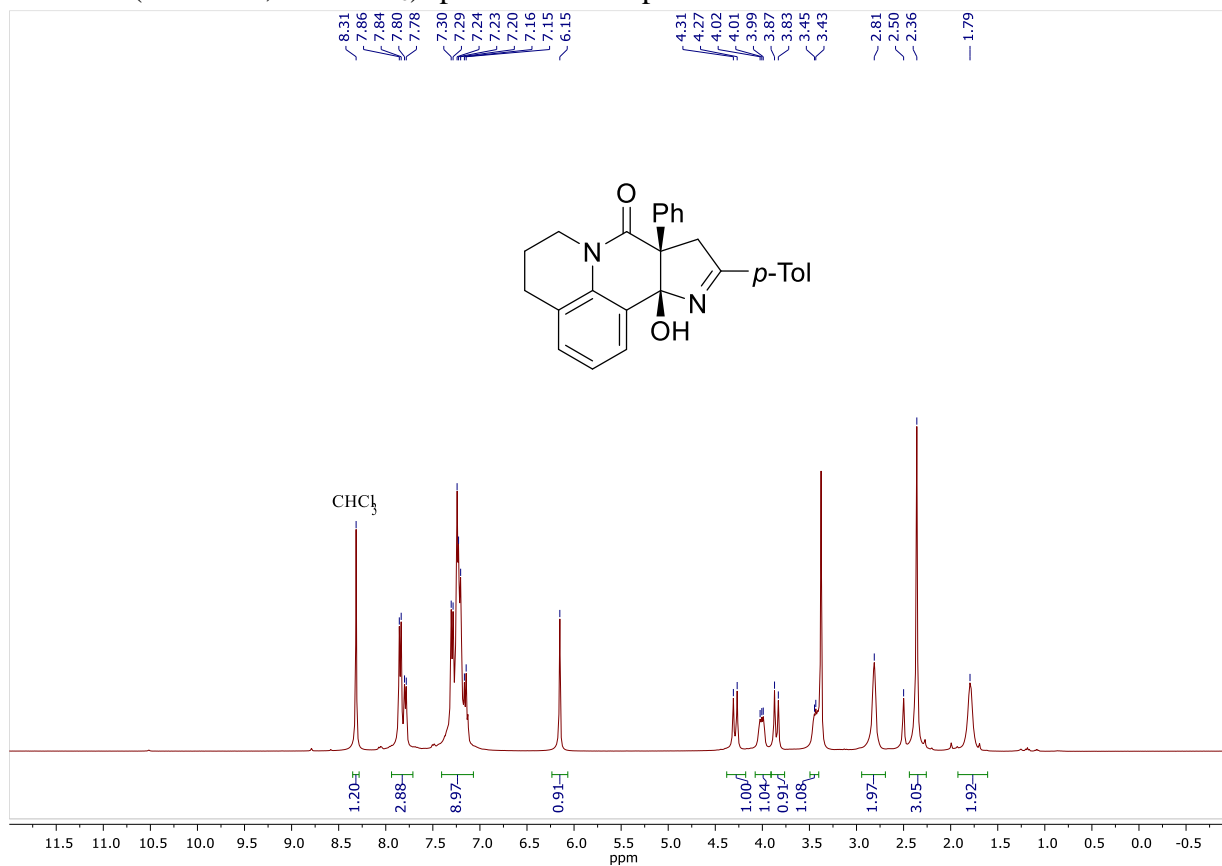

$^{13}\text{C}$  NMR (100 MHz,  $\text{DMSO-d}_6$ ) spectrum of compound **3m**

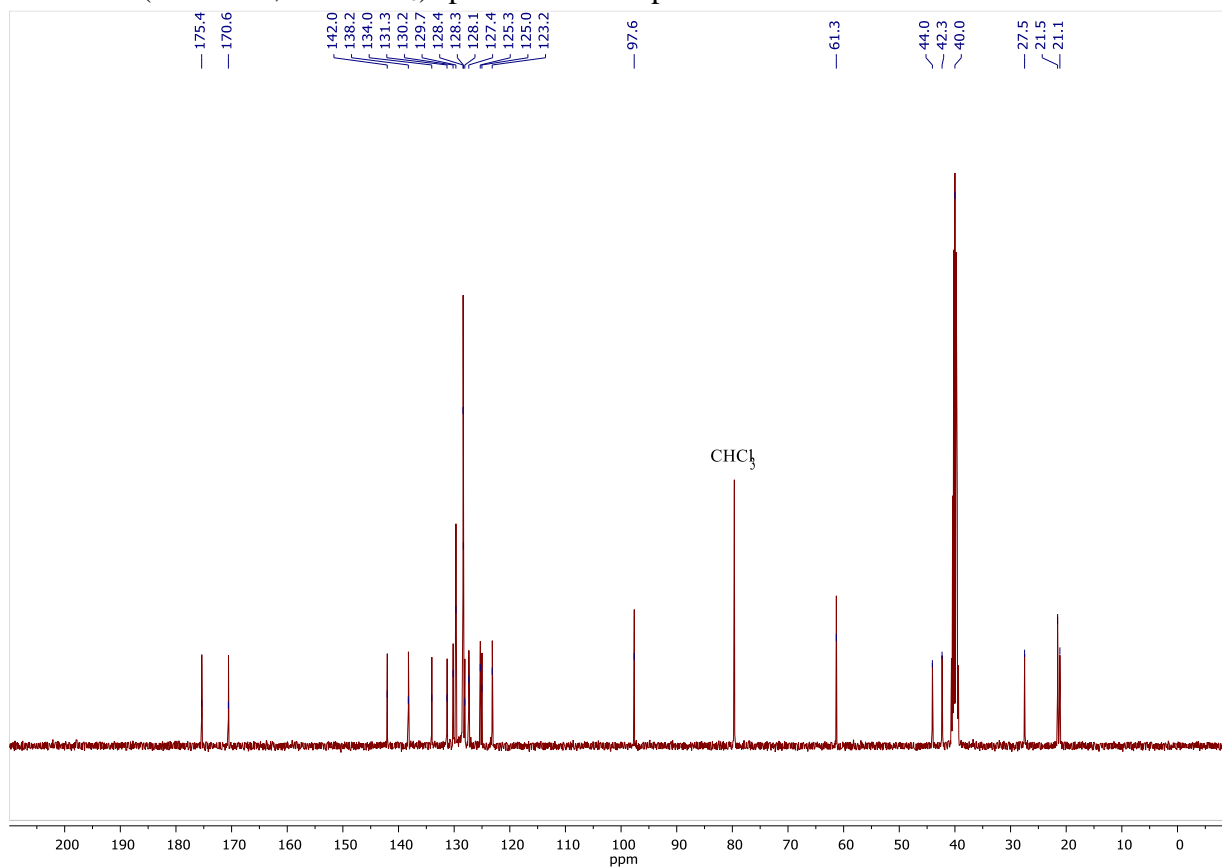



$^1\text{H}$  NMR (400 MHz,  $\text{DMSO-d}_6$ ) spectrum of compound **3n**

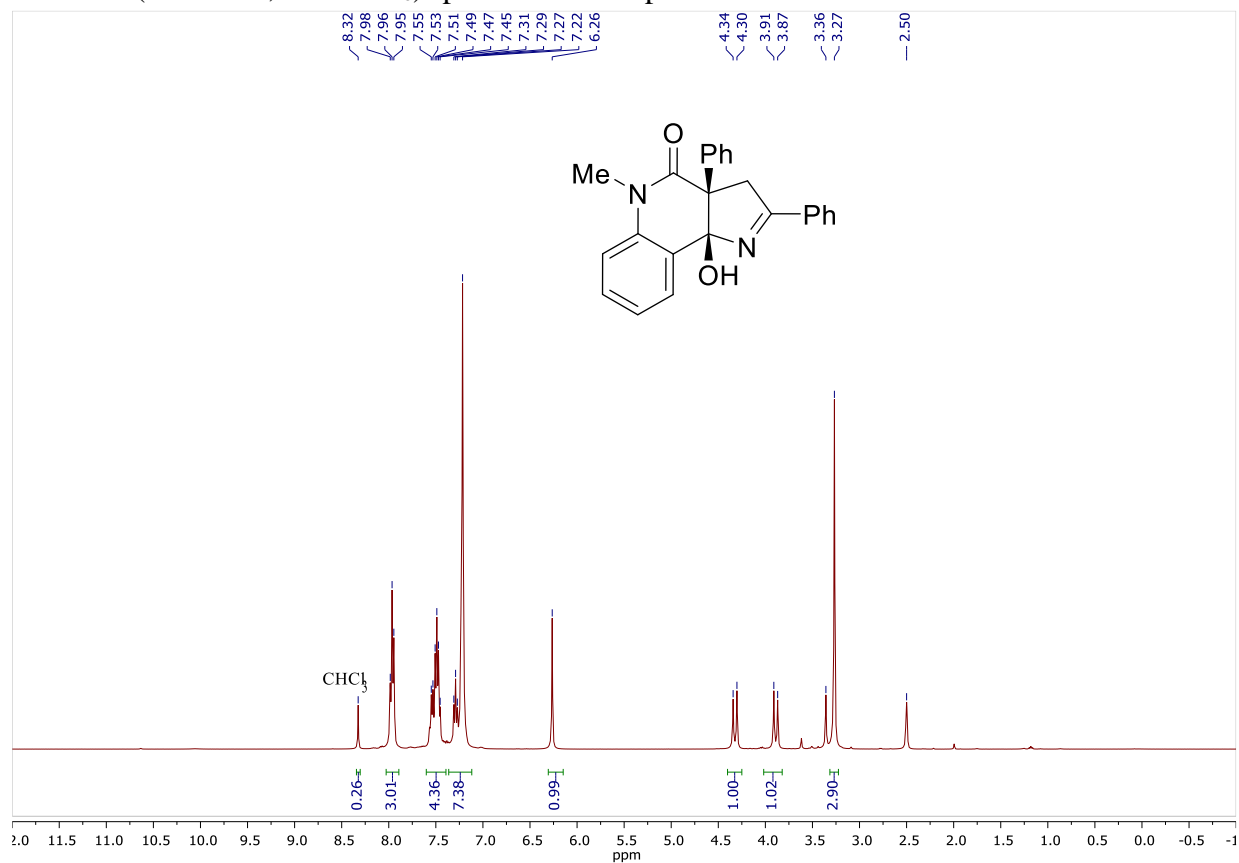

$^{13}\text{C}$  NMR (100 MHz,  $\text{DMSO-d}_6$ ) spectrum of compound **3n**

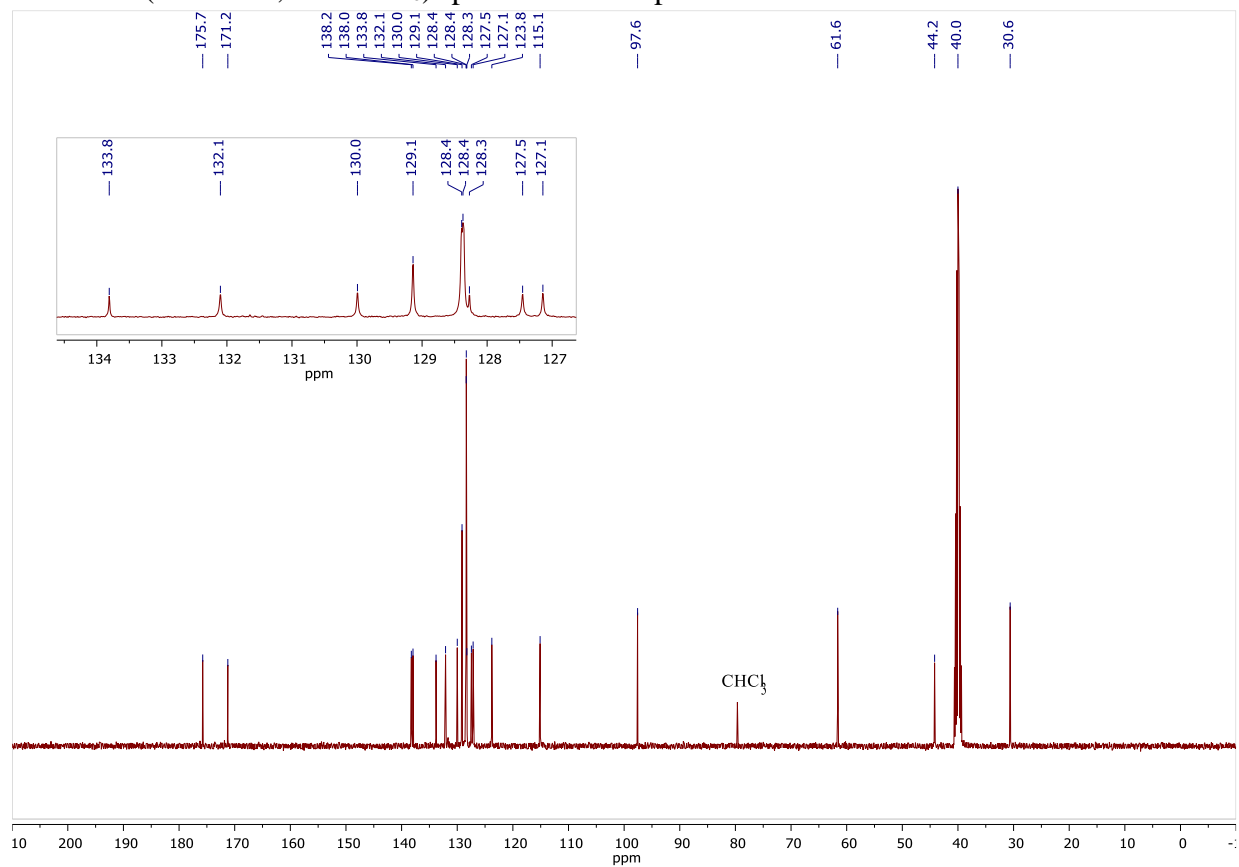

$^1\text{H}$  NMR (400 MHz,  $\text{DMSO-d}_6$ ) spectrum of compound **3o**

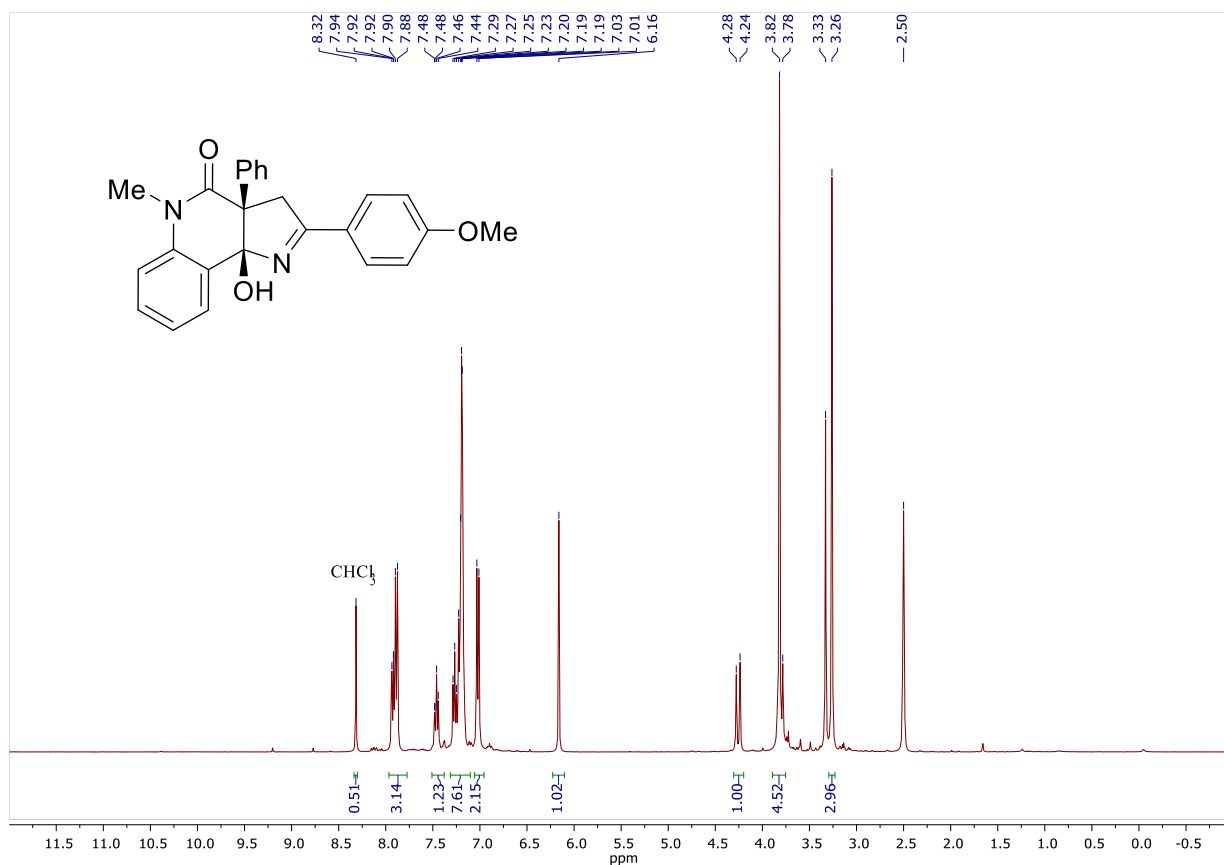

$^{13}\text{C}$  NMR (100 MHz,  $\text{DMSO-d}_6$ ) spectrum of compound **3o**

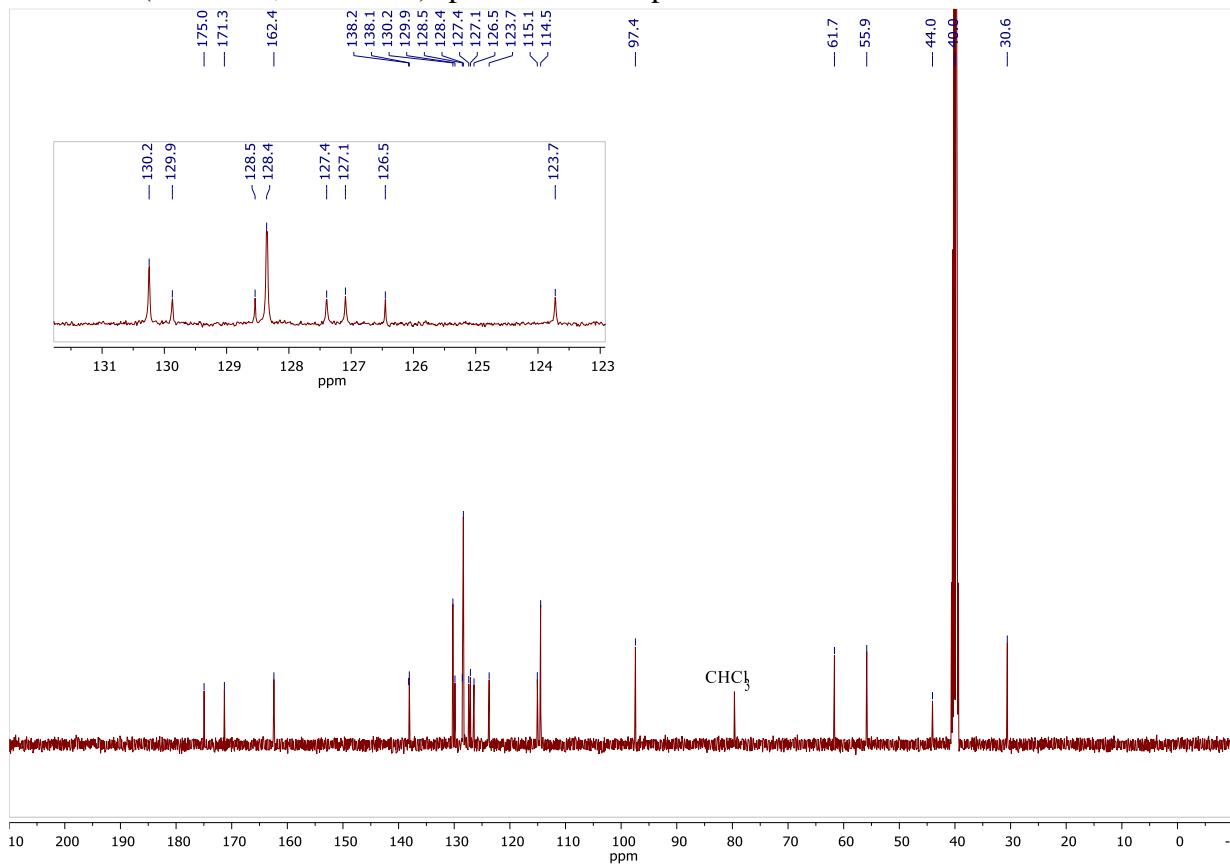

$^1\text{H}$  NMR (400 MHz,  $\text{DMSO-d}_6$ ) spectrum of compound **3p**

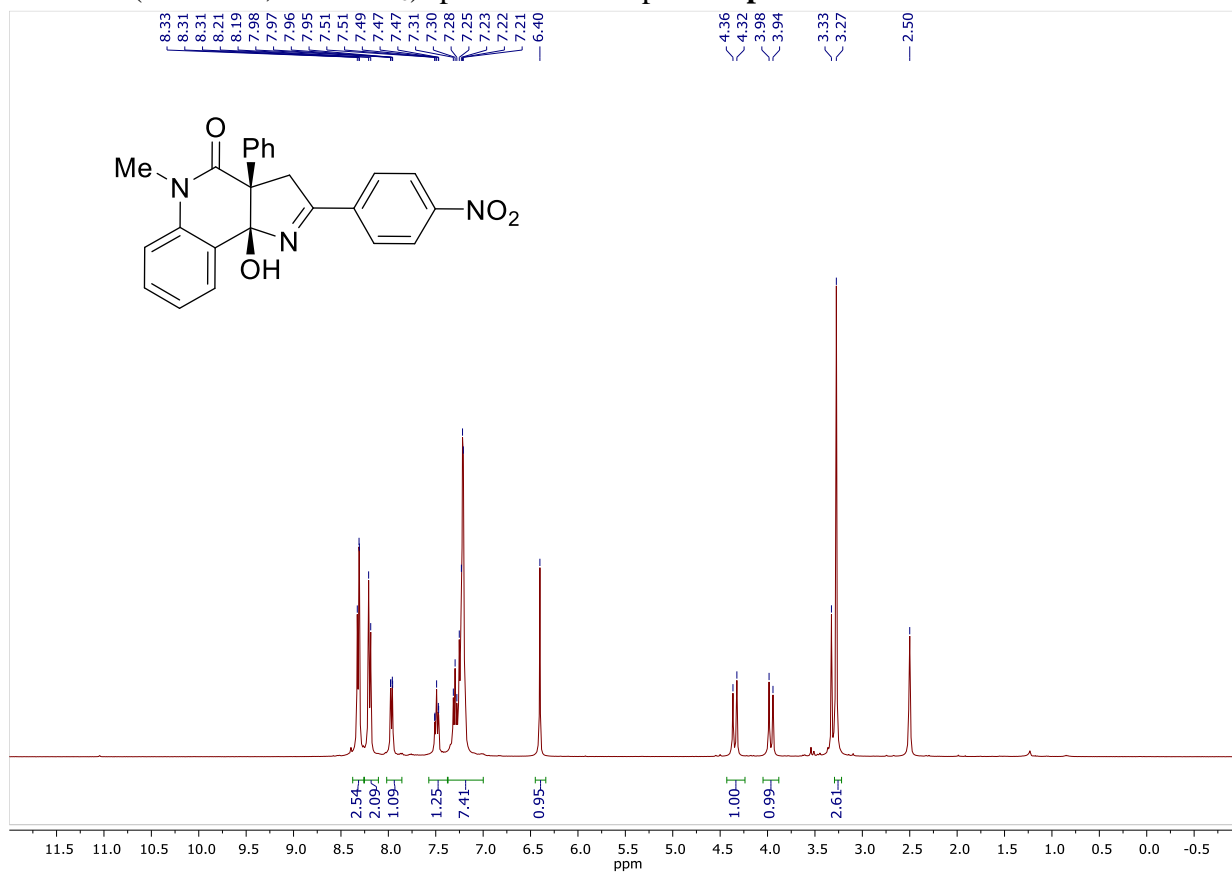

$^{13}\text{C}$  NMR (100 MHz,  $\text{DMSO-d}_6$ ) spectrum of compound **3p**

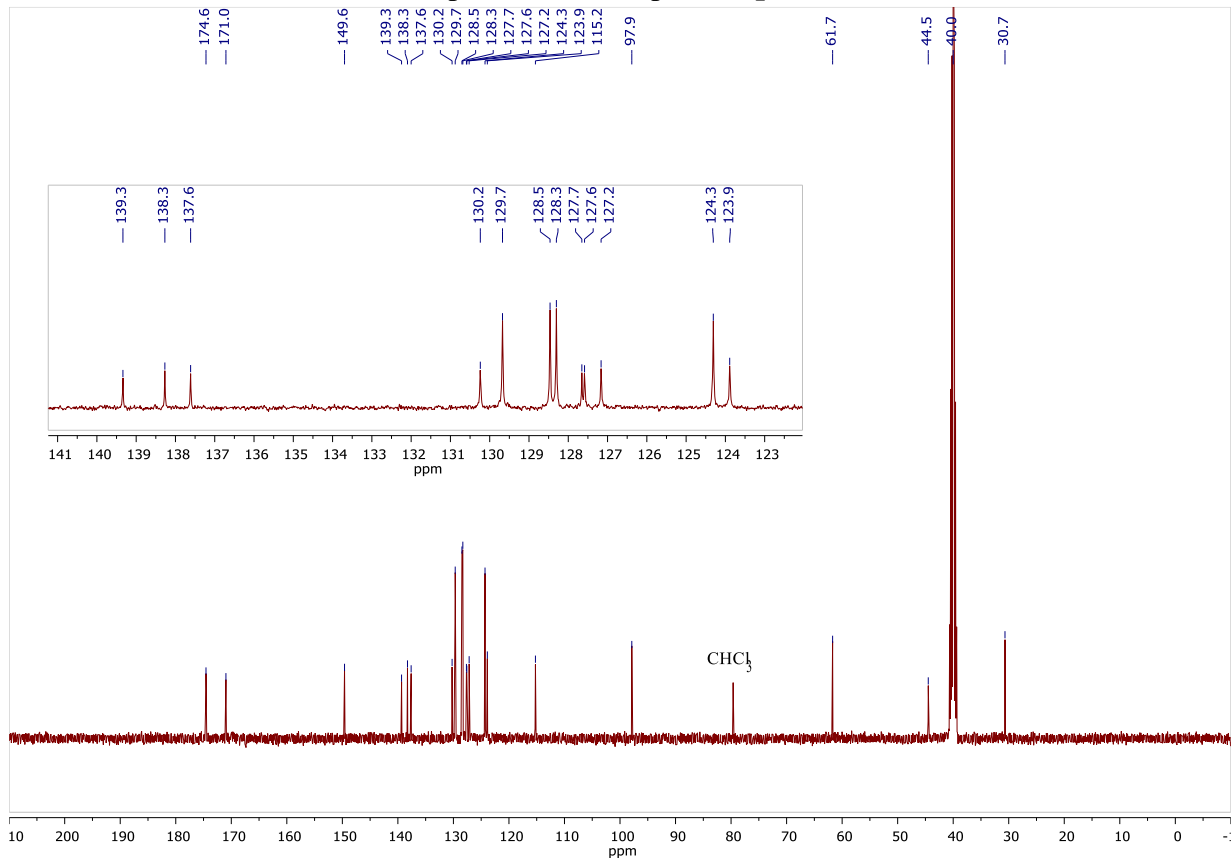

$^1\text{H}$  NMR (400 MHz,  $\text{DMSO-d}_6$ ) spectrum of compound **6a**

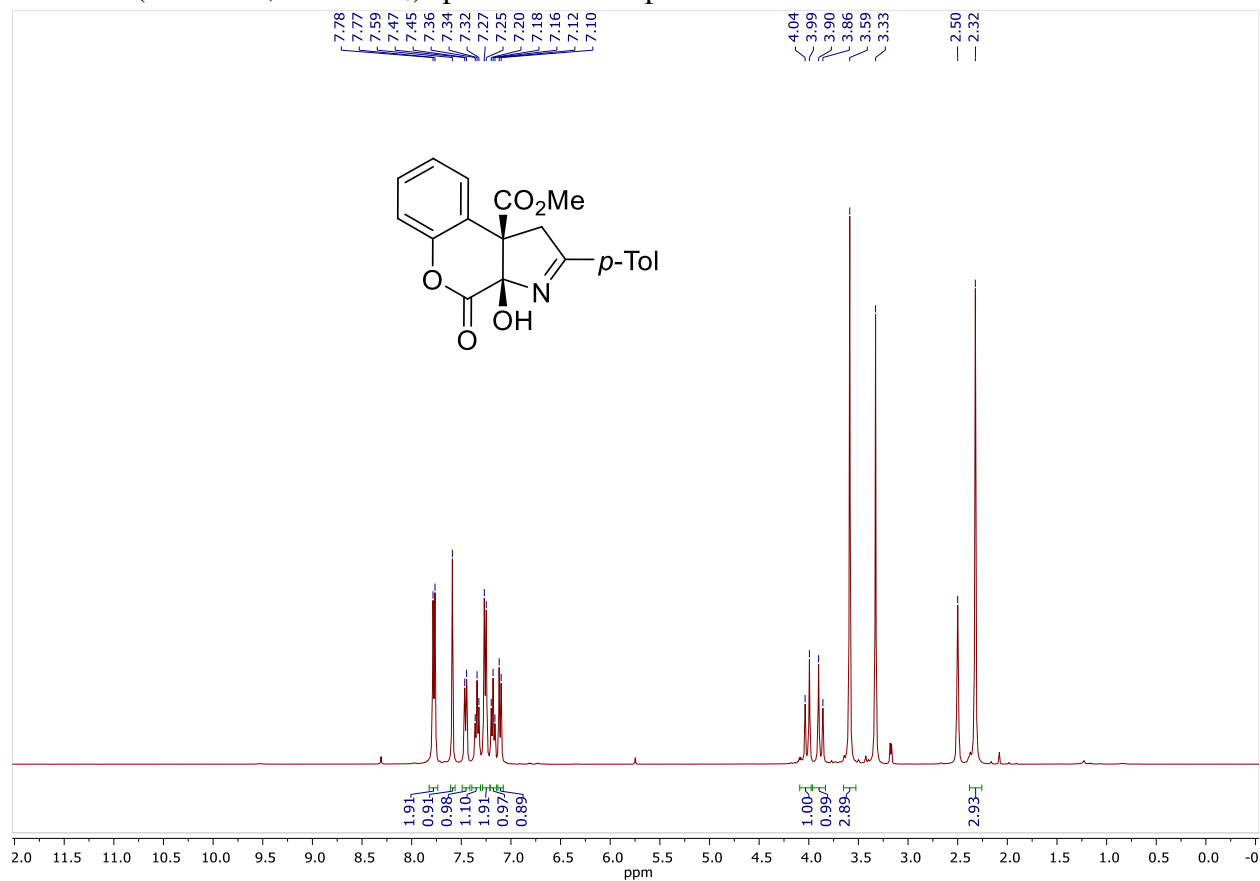

$^{13}\text{C}$  NMR (100 MHz,  $\text{DMSO-d}_6$ ) spectrum of compound **6a**

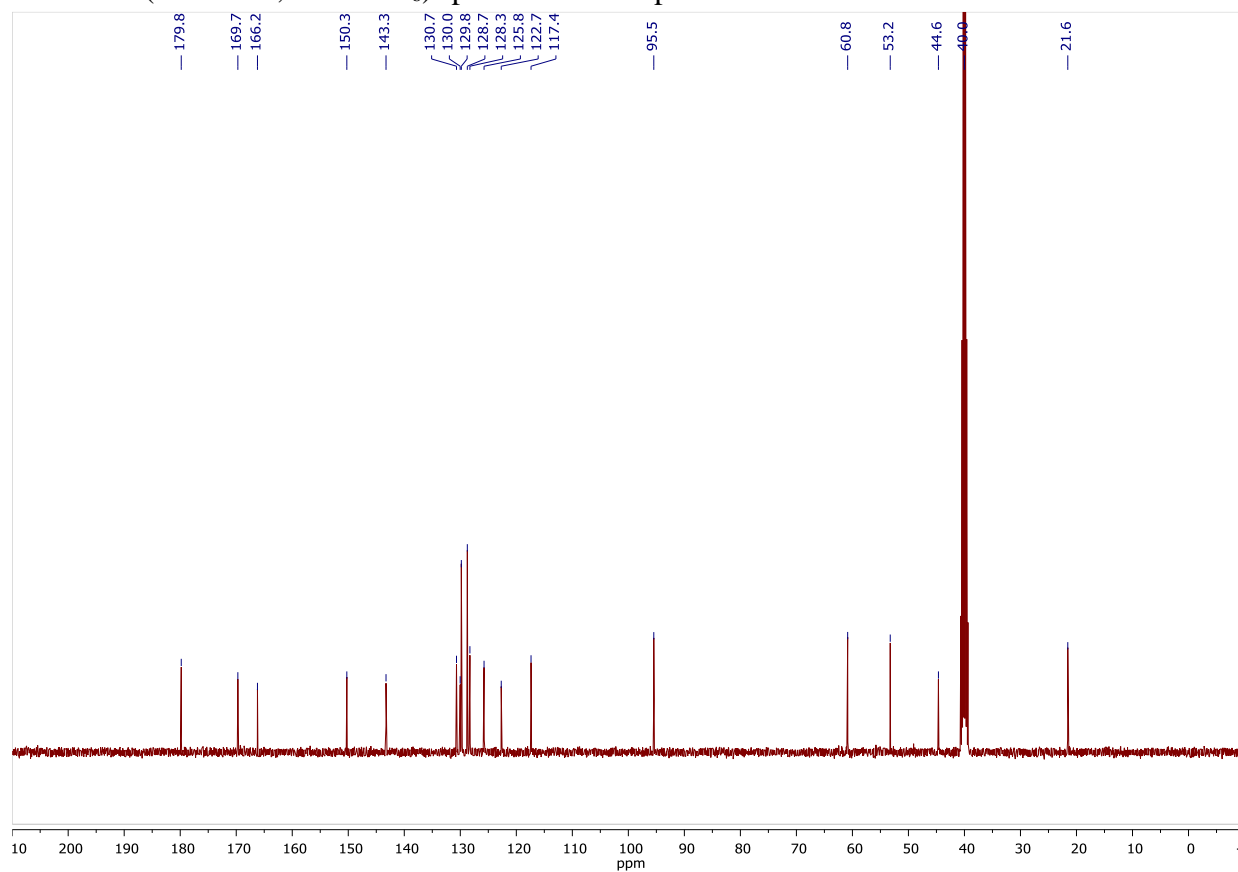

$^1\text{H}$  NMR (400 MHz,  $\text{DMSO-d}_6$ ) spectrum of compound **6b**

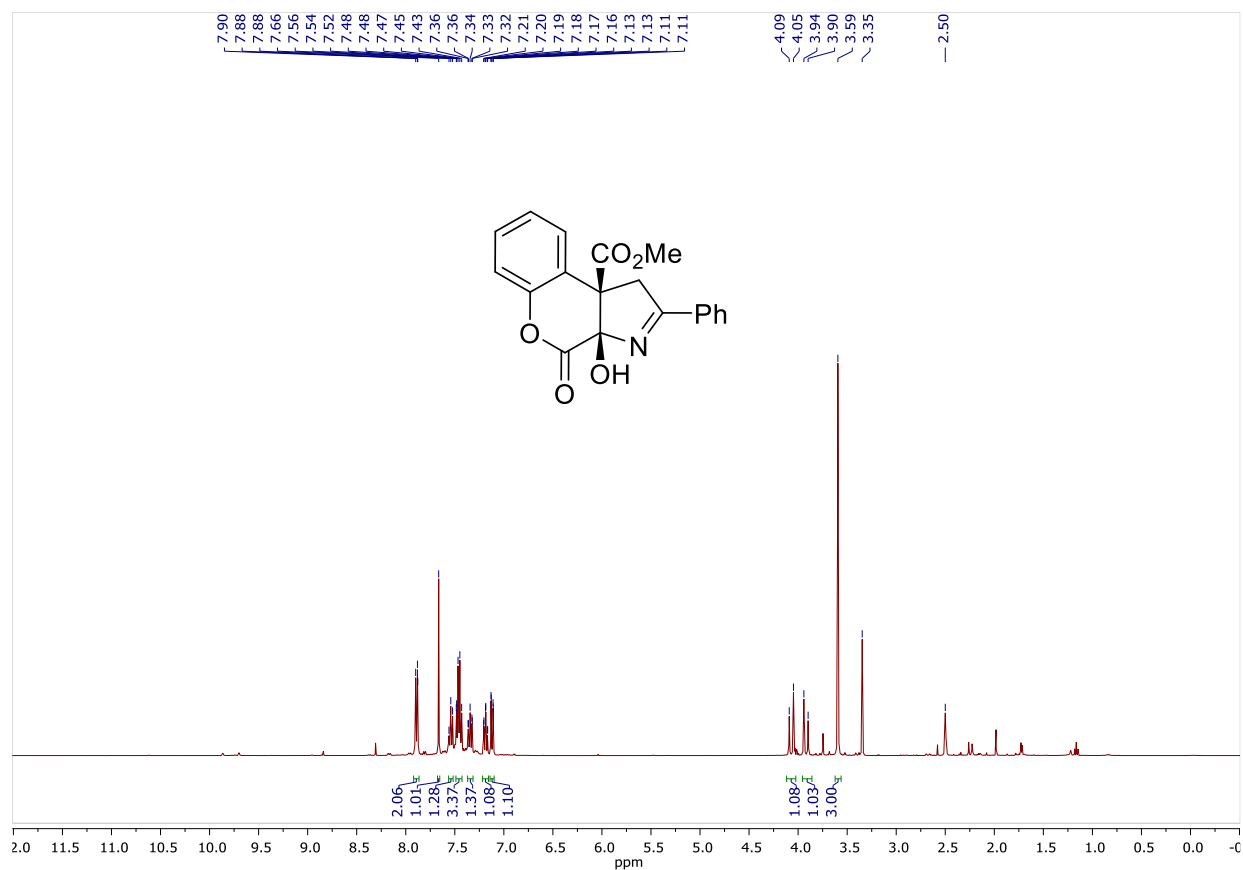

$^{13}\text{C}$  NMR (100 MHz,  $\text{DMSO-d}_6$ ) spectrum of compound **6b**

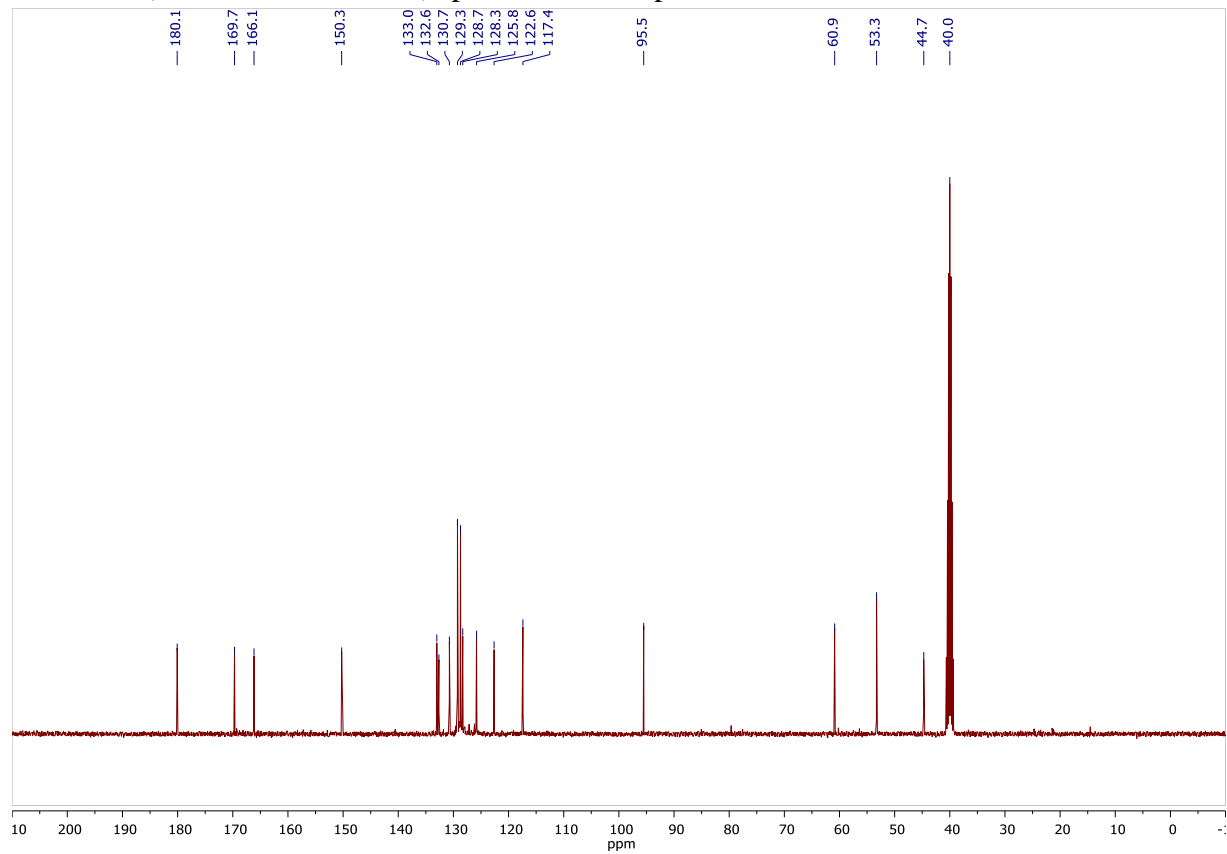

$^1\text{H}$  NMR (400 MHz,  $\text{DMSO-d}_6$ ) spectrum of compound **6c**

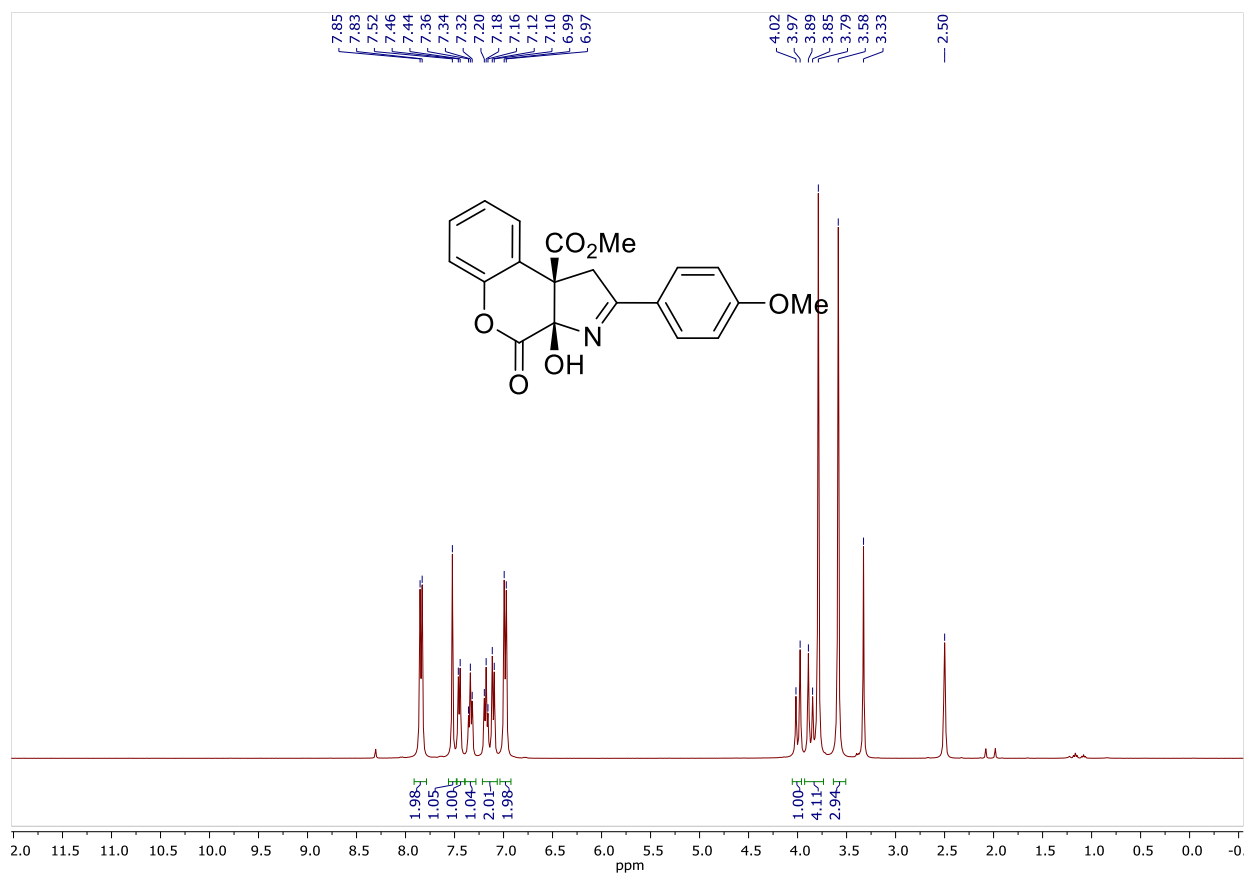

$^{13}\text{C}$  NMR (100 MHz,  $\text{DMSO-d}_6$ ) spectrum of compound **6c**

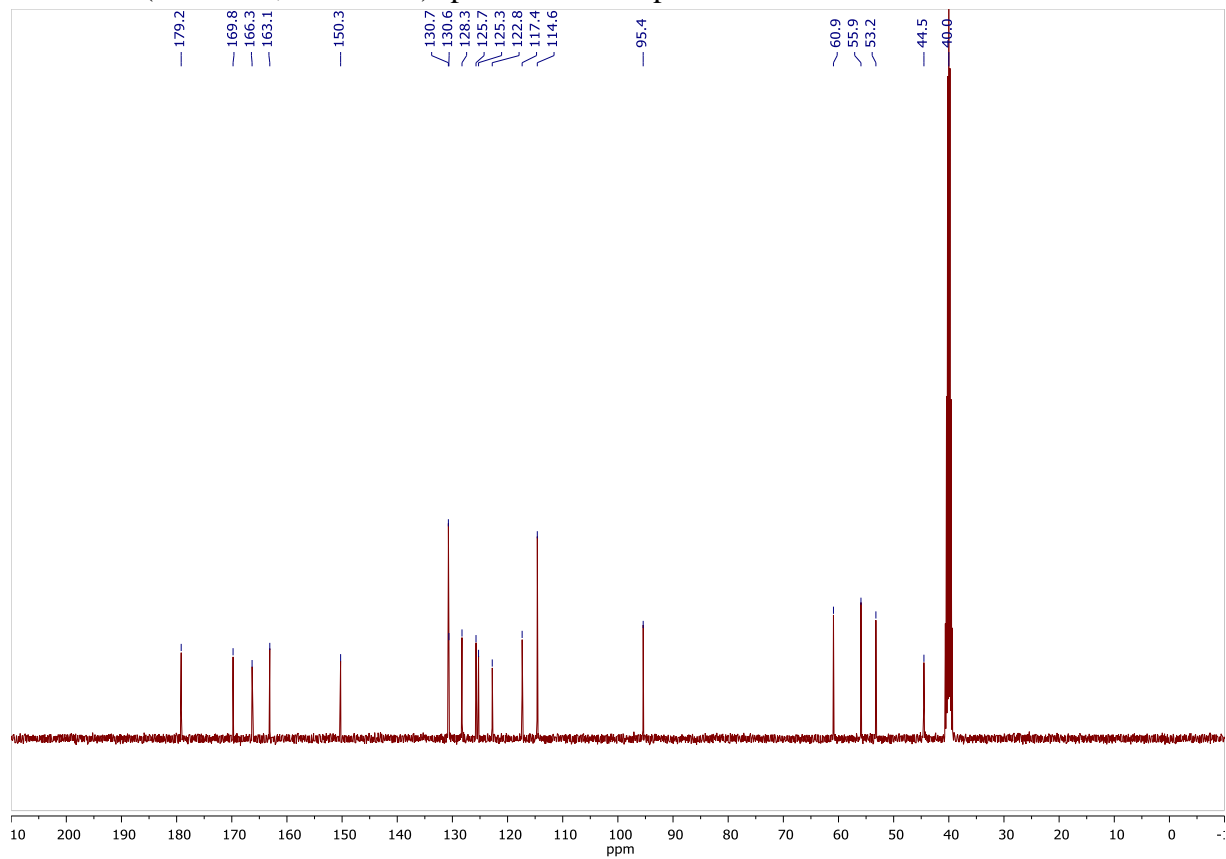

$^1\text{H}$  NMR (400 MHz,  $\text{DMSO-d}_6$ ) spectrum of compound **6d**

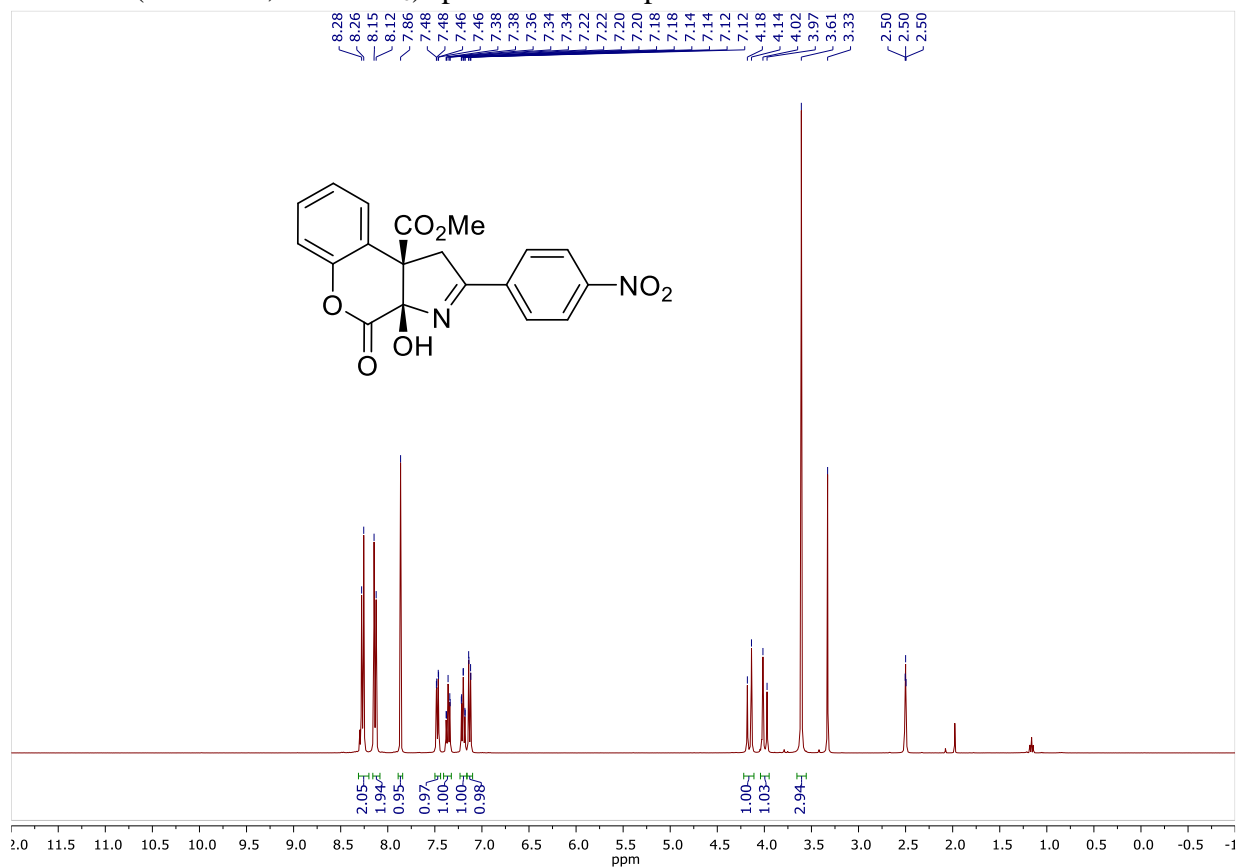

$^{13}\text{C}$  NMR (100 MHz,  $\text{DMSO-d}_6$ ) spectrum of compound **6d**

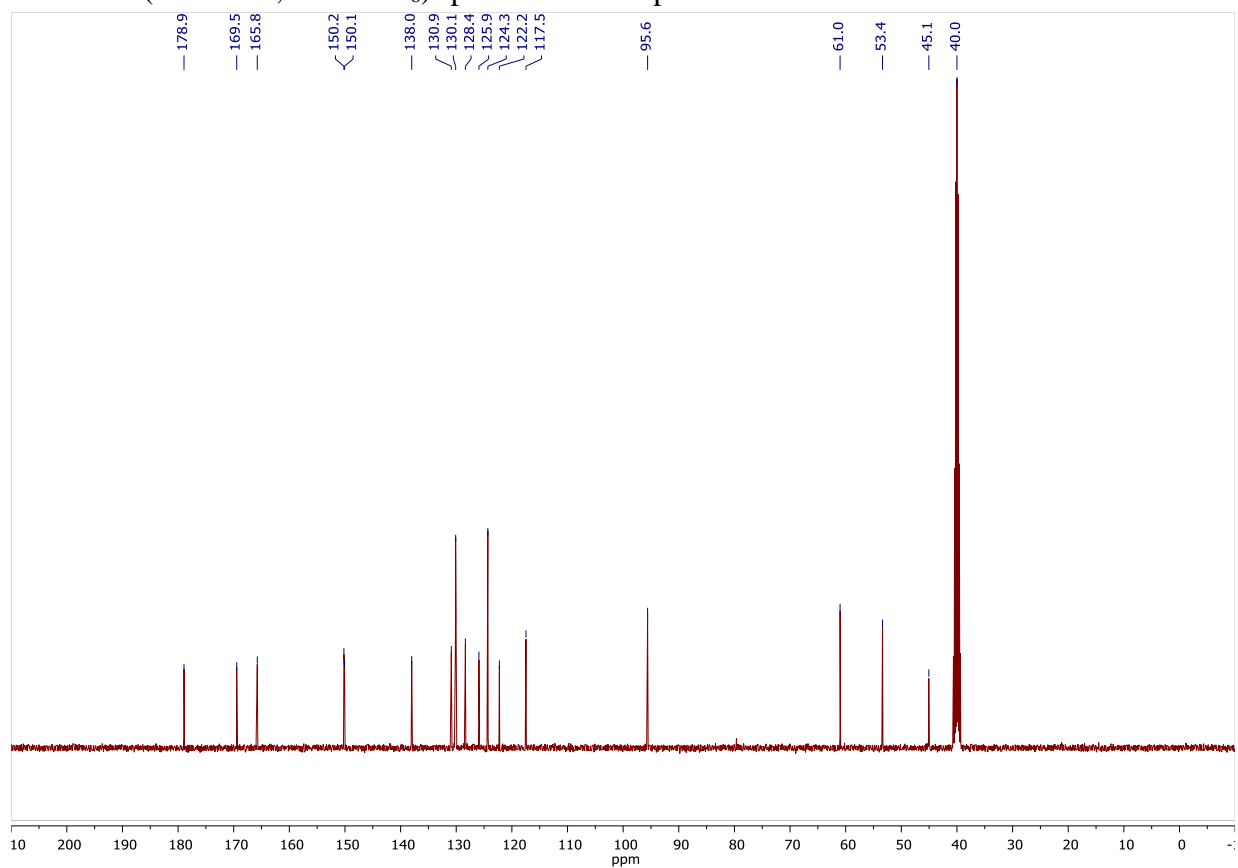

$^1\text{H}$  NMR (400 MHz,  $\text{CDCl}_3/\text{DMSO-d}_6$  mixture) spectrum of compound **8**

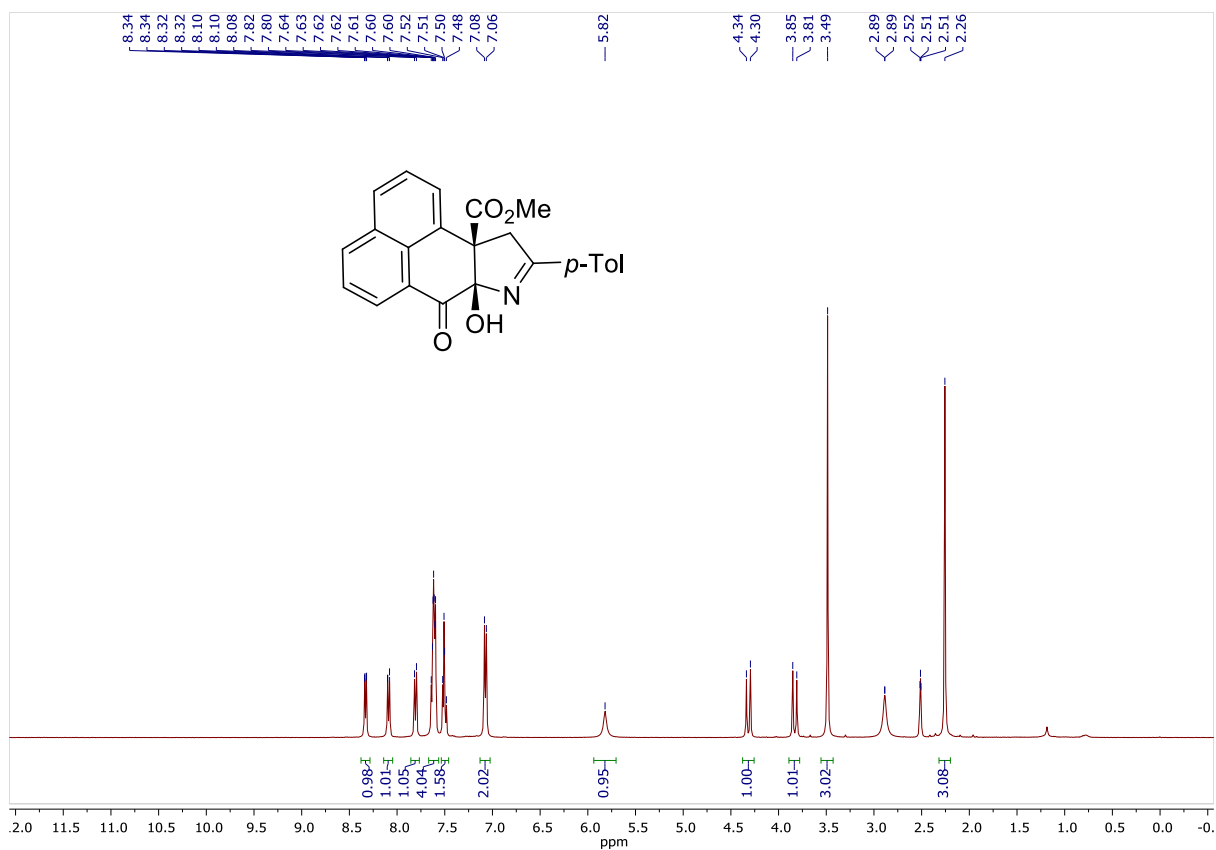

$^{13}\text{C}$  NMR (100 MHz,  $\text{CDCl}_3/\text{DMSO-d}_6$  mixture) spectrum of compound **8**

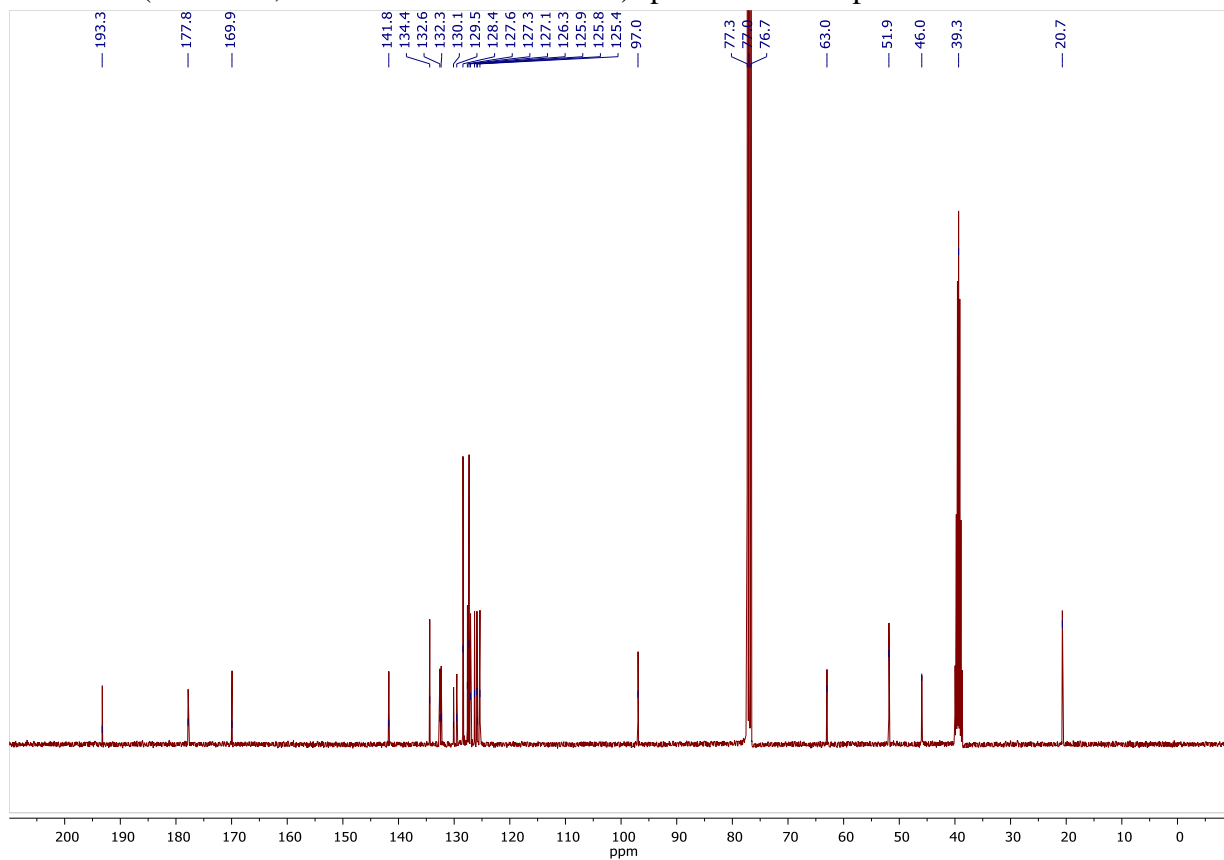



$^1\text{H}$  NMR (400 MHz,  $\text{CDCl}_3$ ) spectrum of compound **15**

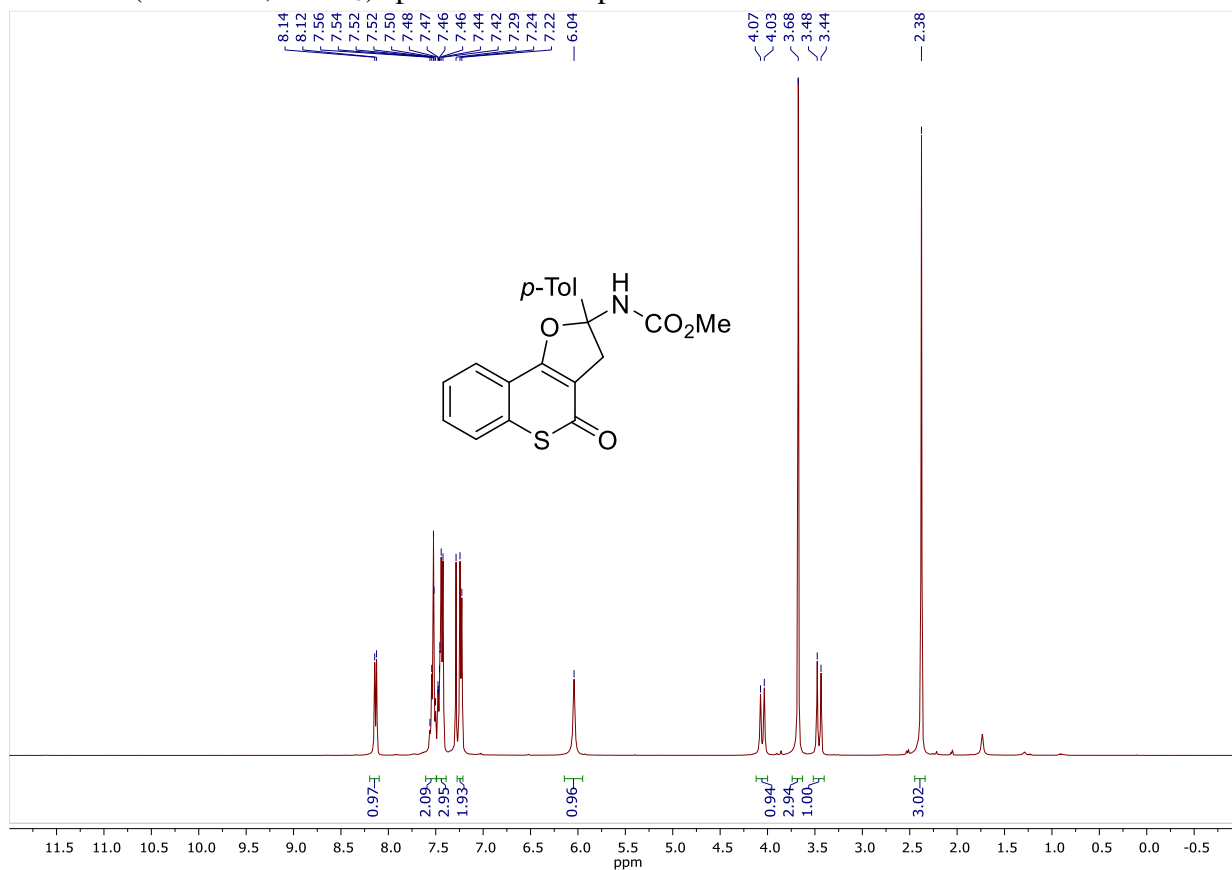

$^{13}\text{C}$  NMR (100 MHz,  $\text{CDCl}_3$ ) spectrum of compound **15**

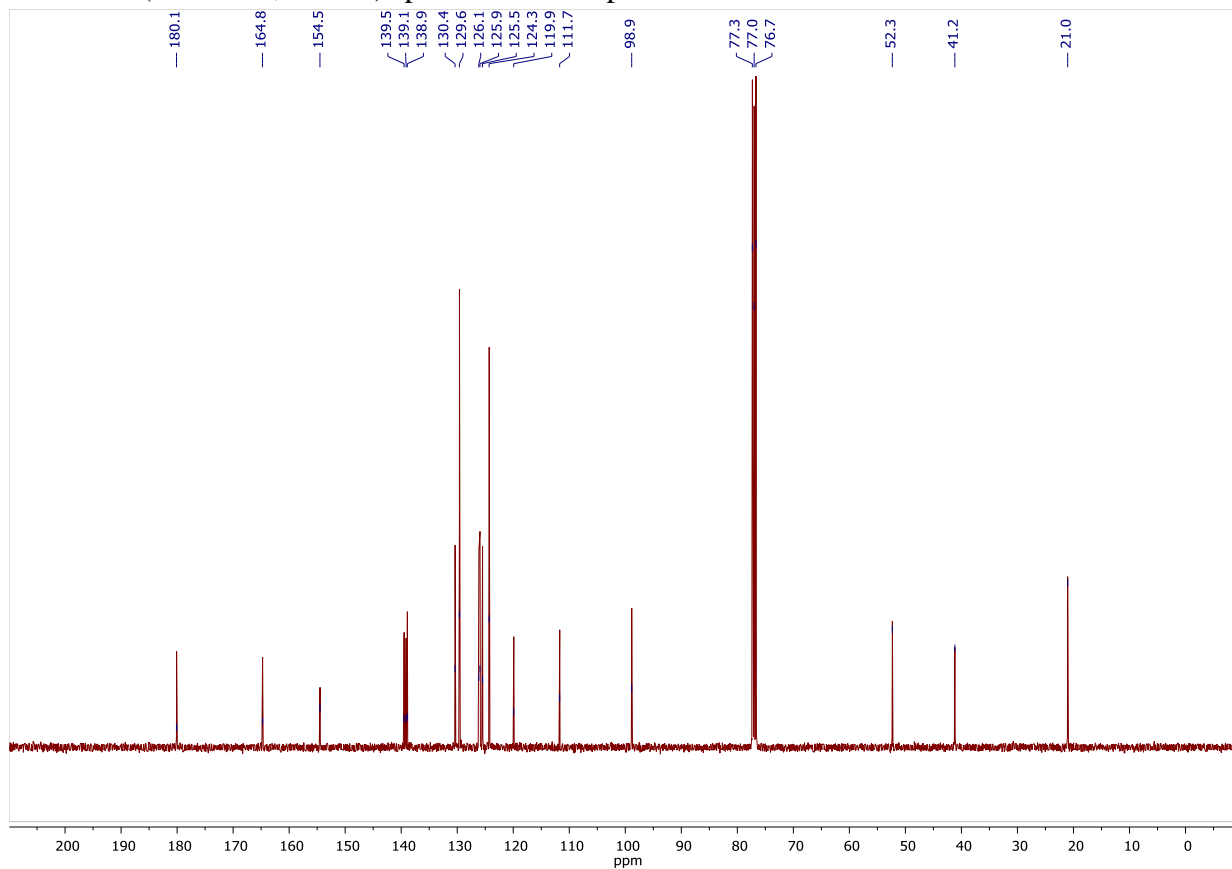

$^1\text{H}$  NMR (400 MHz,  $\text{CDCl}_3$ ) spectrum of compound **16**

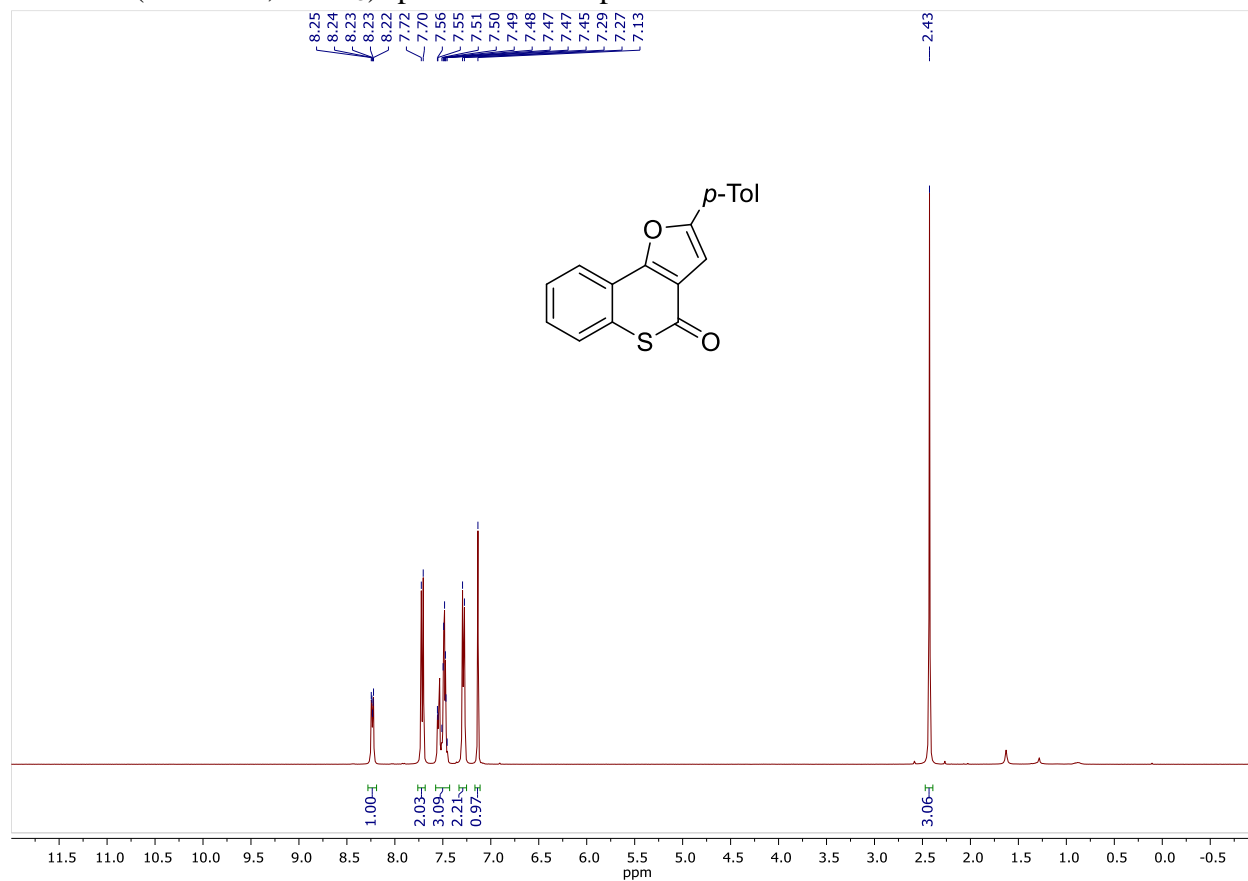

$^{13}\text{C}$  NMR (100 MHz,  $\text{CDCl}_3$ ) spectrum of compound **16**

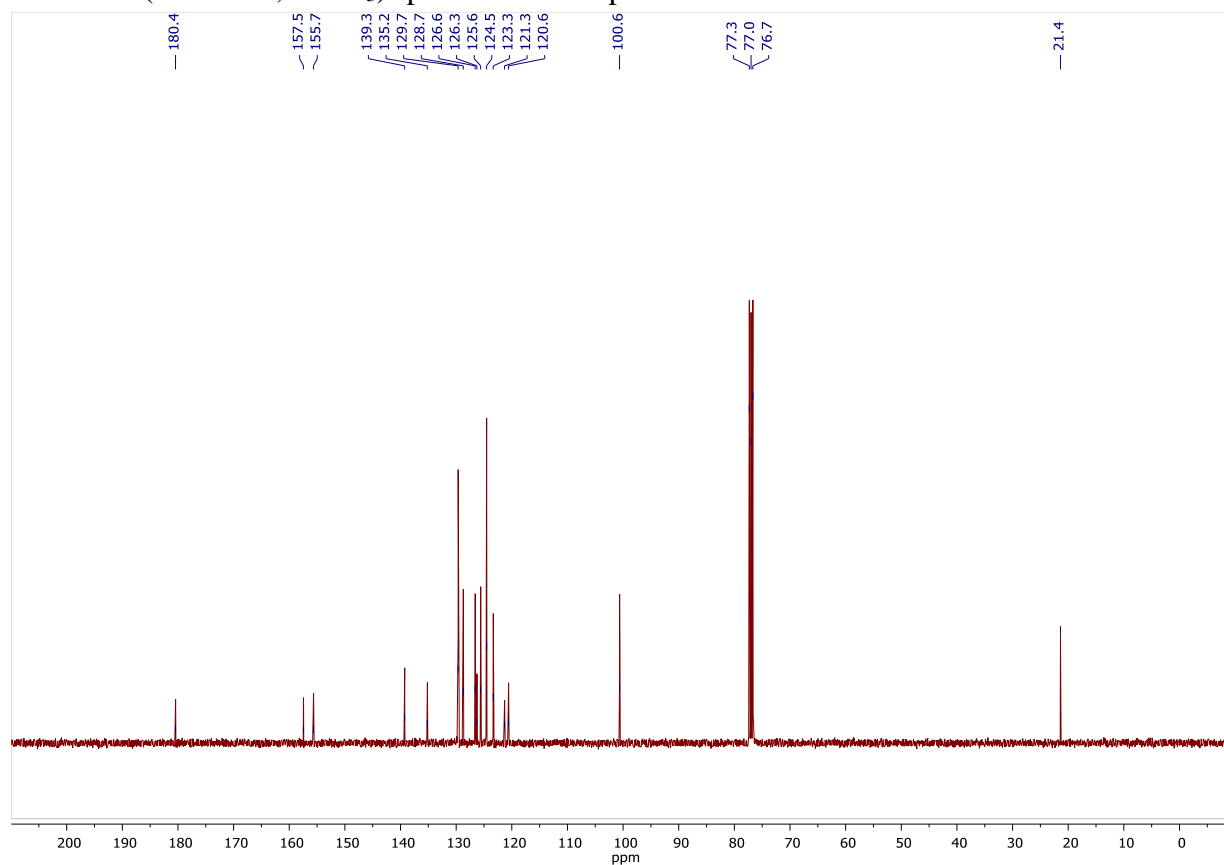

$^1\text{H}$  NMR (400 MHz,  $\text{DMSO-d}_6$ ) spectrum of compound **18**

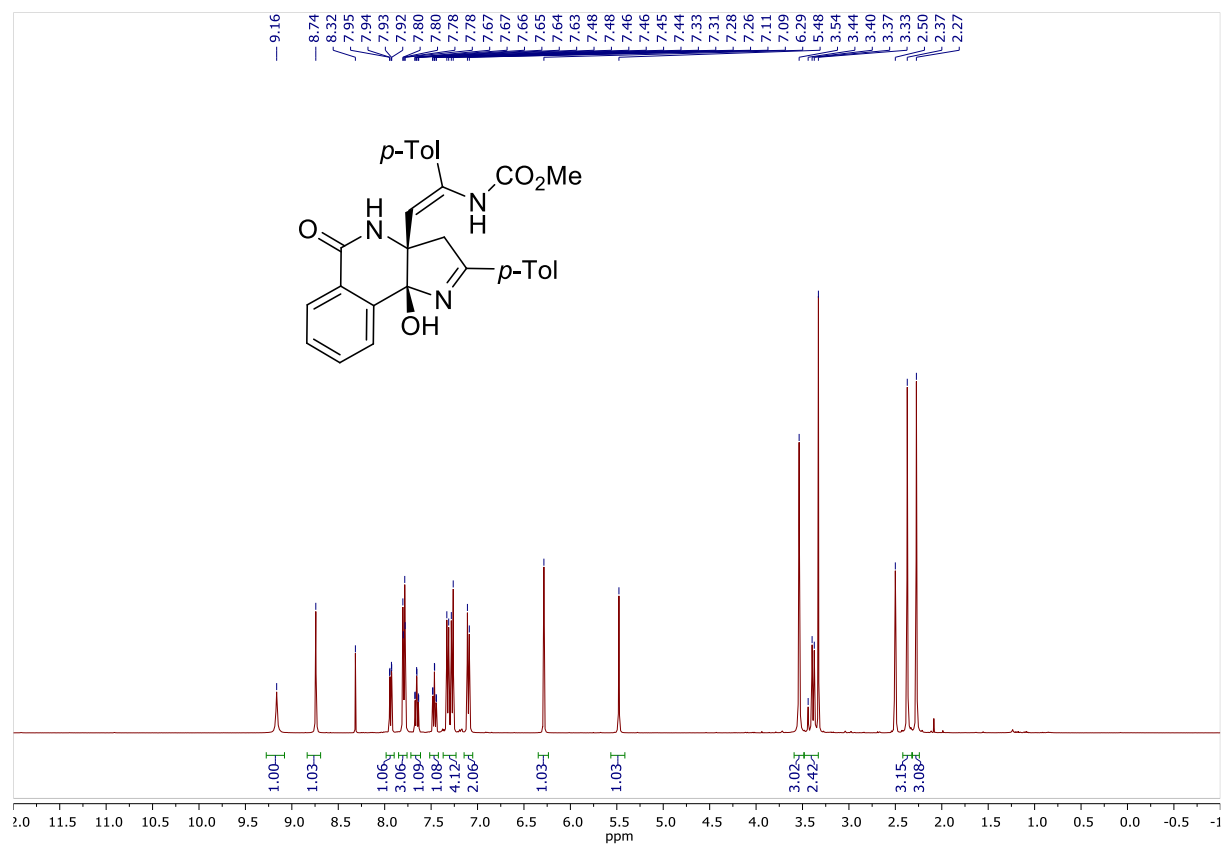

$^{13}\text{C}$  NMR (100 MHz,  $\text{DMSO-d}_6$ ) spectrum of compound **18**

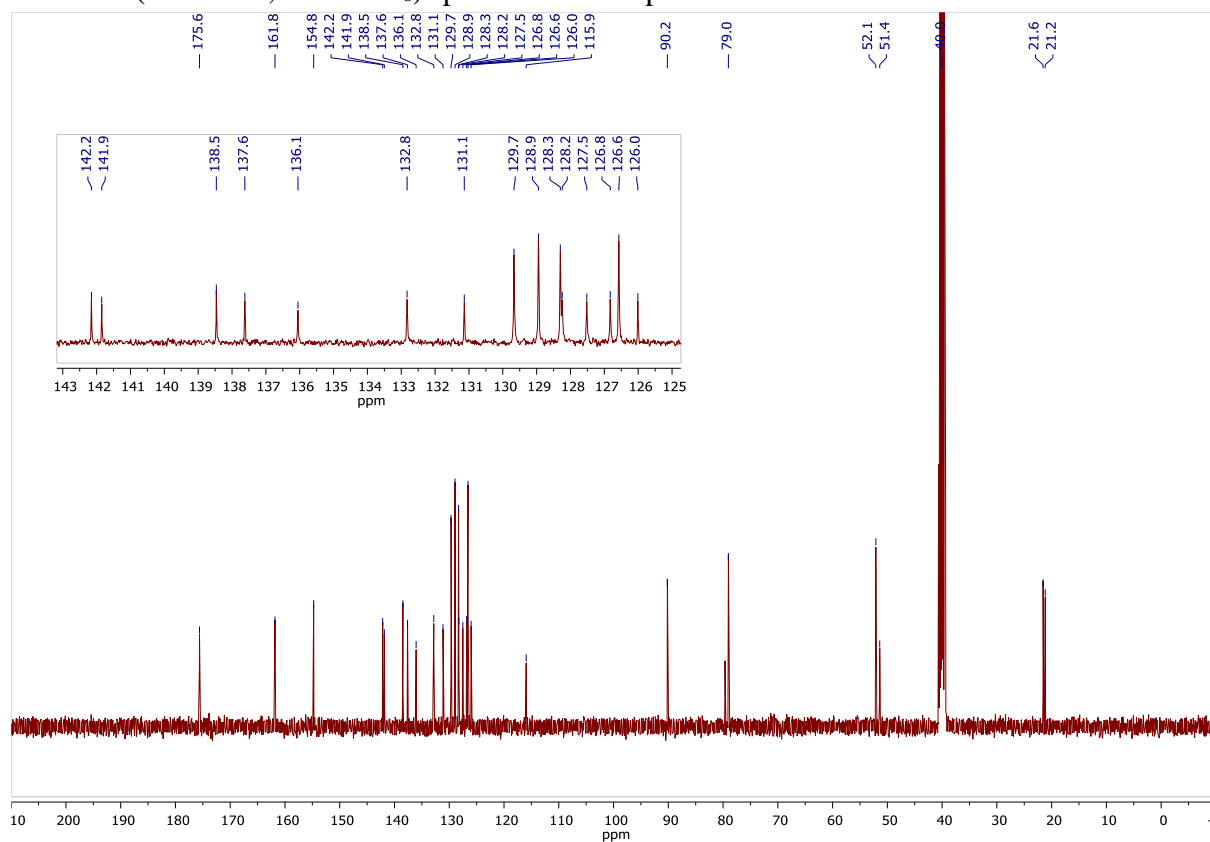

HSQC  $^1\text{H}$ - $^{13}\text{C}$  NMR (DMSO- $d_6$ ) spectrum of compound **18**

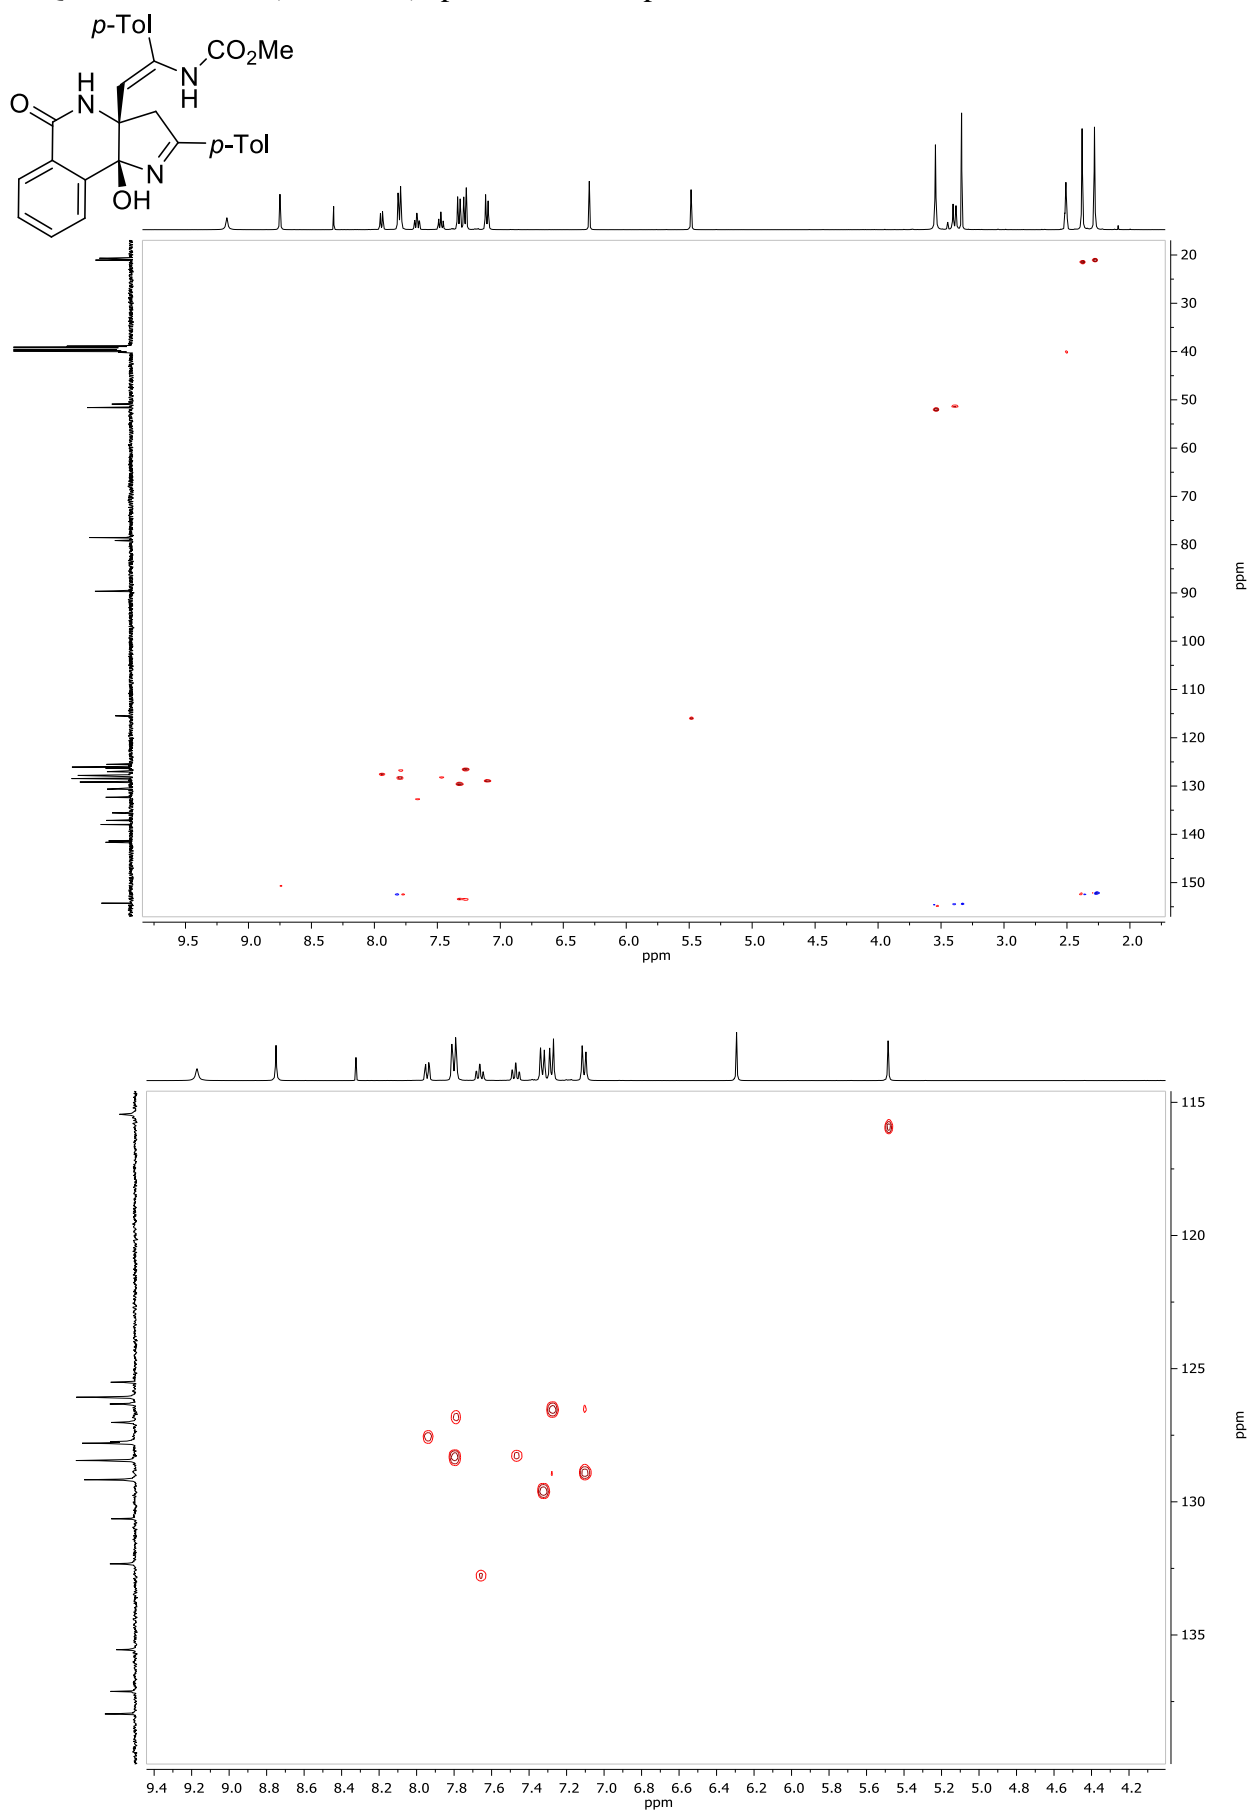

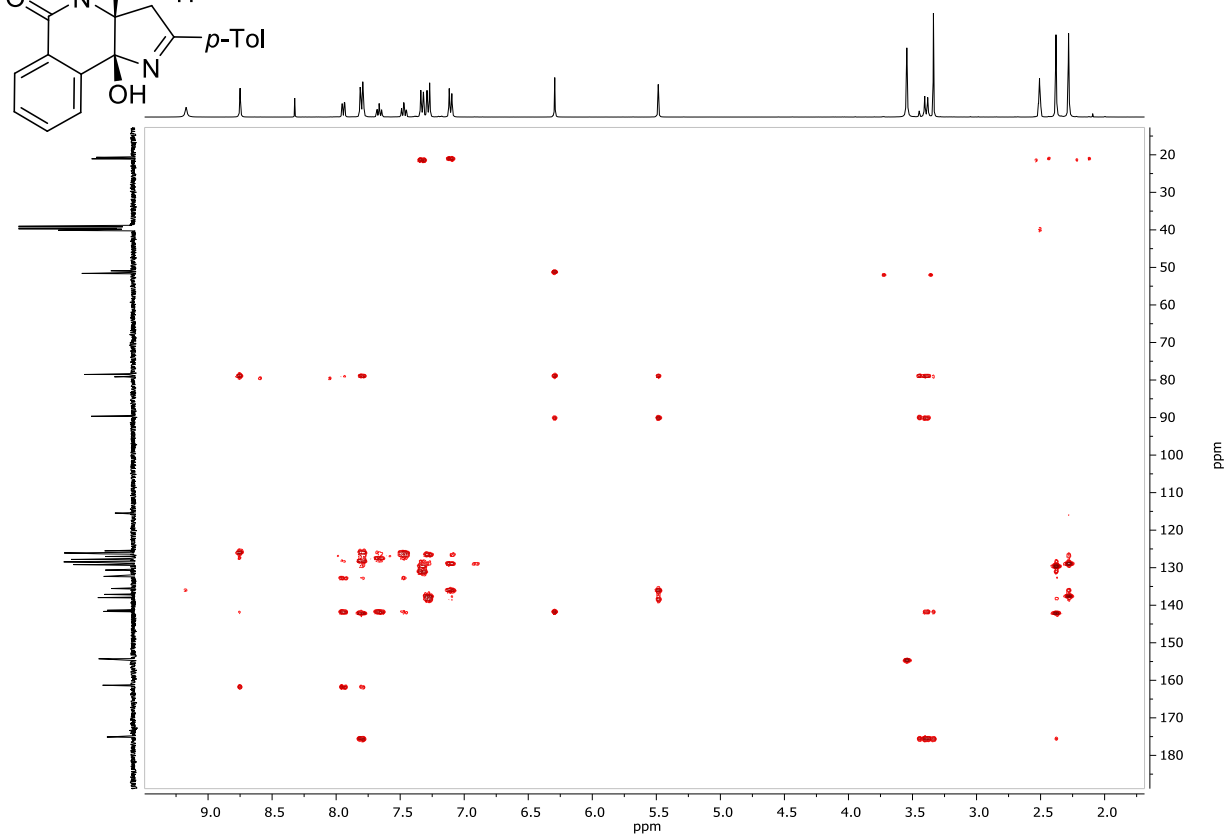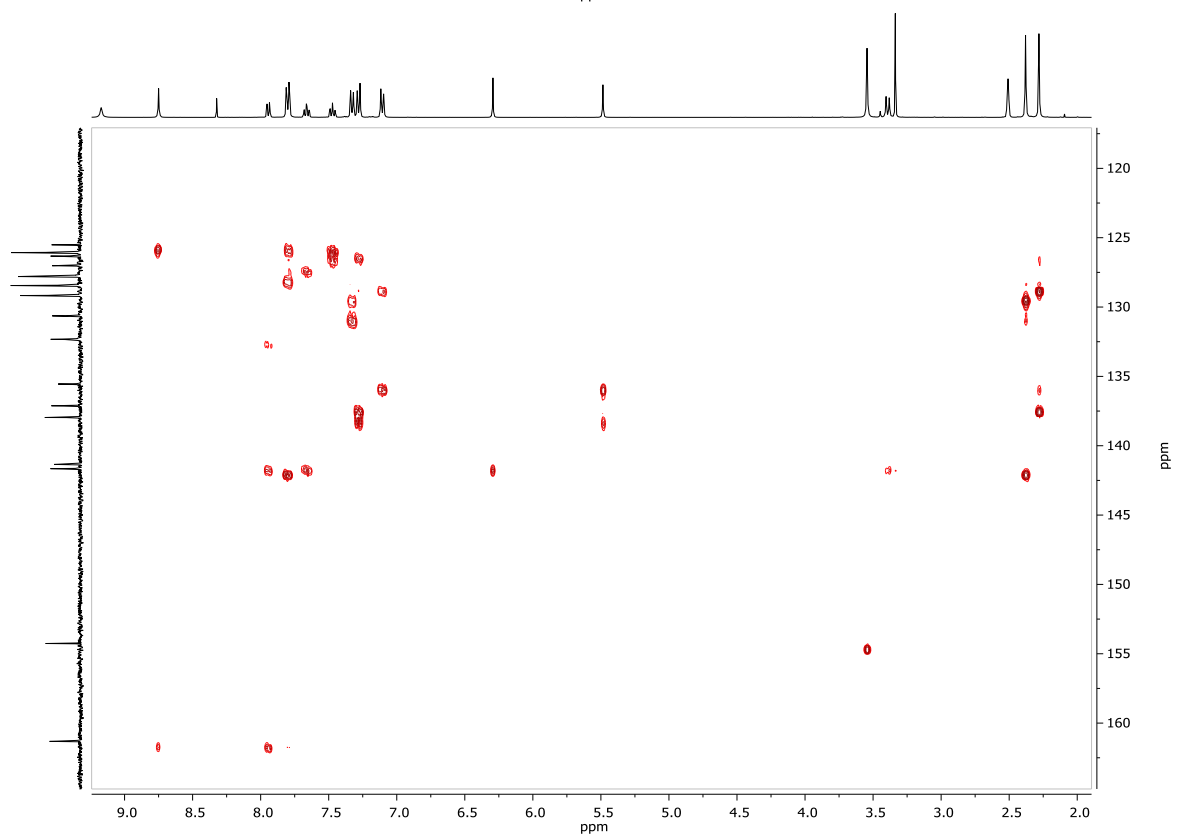

HMBC  $^1\text{H}$ - $^{15}\text{N}$  (DMSO- $\text{d}_6$ ) spectrum of compound **18**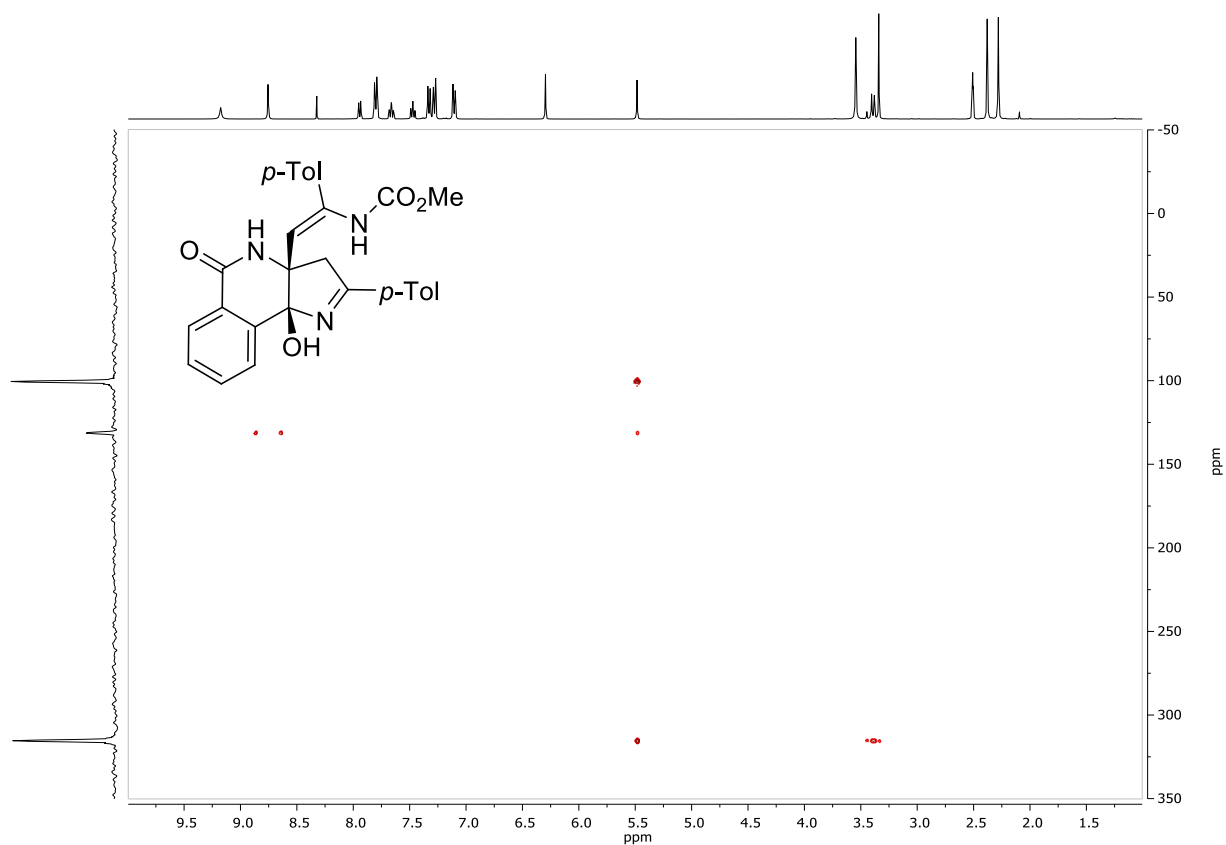HSQC  $^1\text{H}$ - $^{15}\text{N}$  NMR ( $\text{DMSO-d}_6$ ) spectrum of compound **18**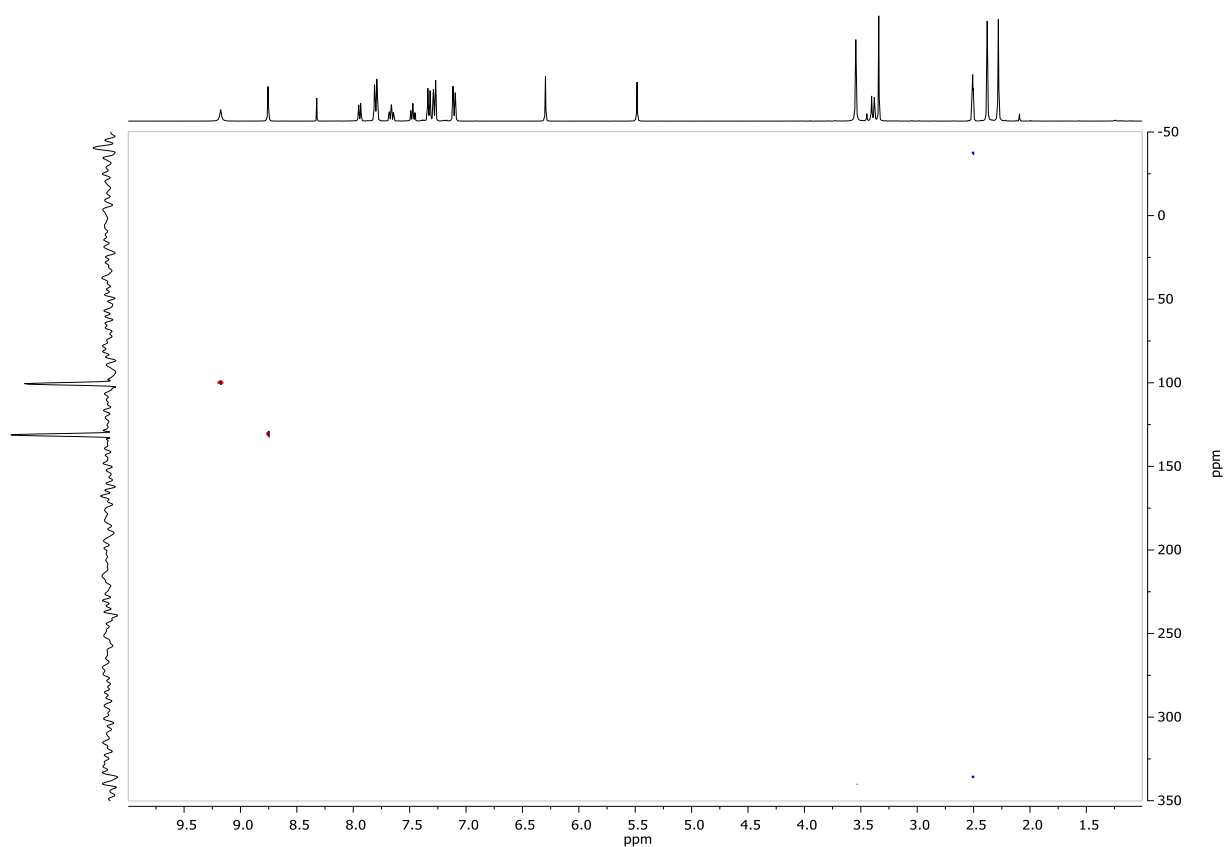

## 2. X-ray Data

### Crystallographic data of compound **3e** (CCDC 1535459)

Single crystal of compound **3e** was grown by slow evaporation of hexane-diethyl ether solution. A suitable crystal was selected and studied on a Agilent Technologies Xcalibur Eos diffractometer. The crystal was kept at 100(2) K during data collection. Using Olex2 [1], the structure was solved with the ShelXS [2] structure solution program using Direct Methods and refined with the ShelXL [3] refinement package using Least Squares minimization.

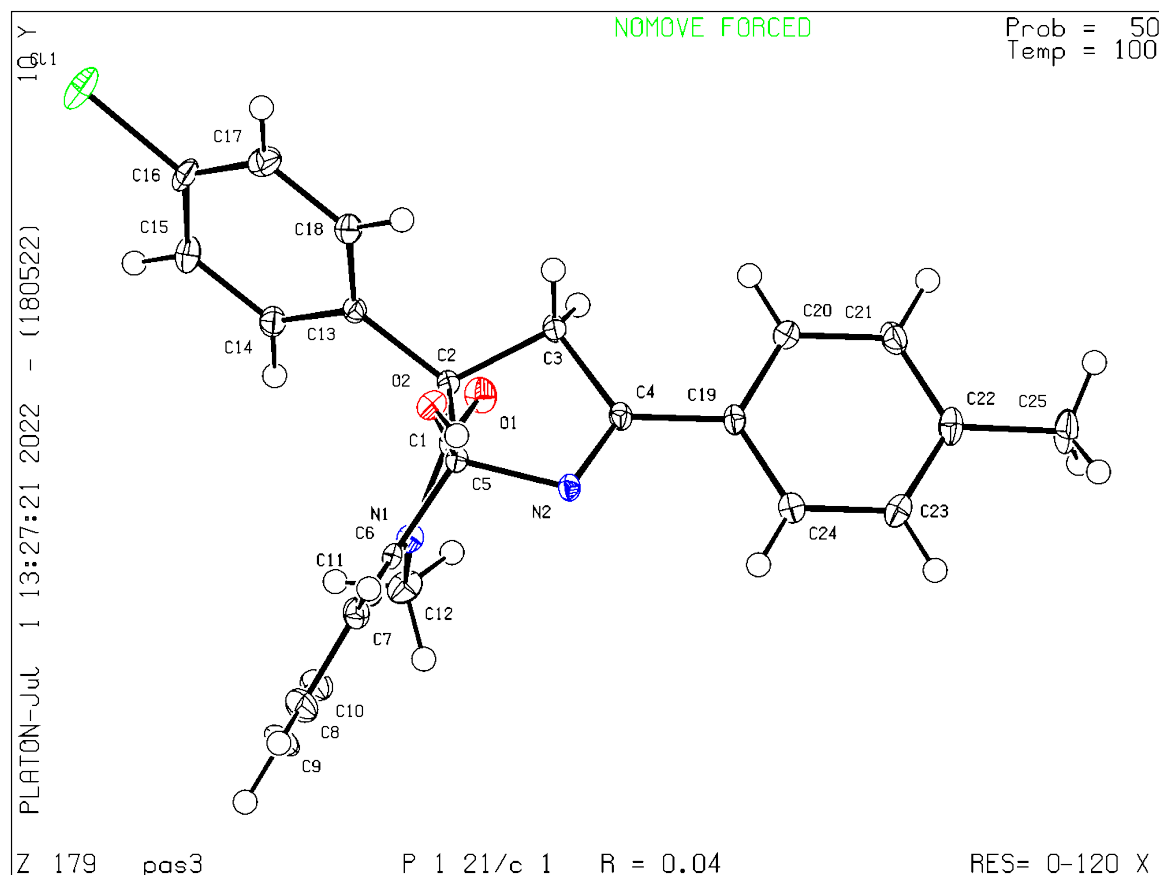

**Figure S1.** Molecular structure of compound **3e**, displacement parameters are drawn at 50% probability level.

**Table S1 Crystal data and structure refinement for 3e.**

|                                             |                                                                  |
|---------------------------------------------|------------------------------------------------------------------|
| Empirical formula                           | C <sub>25</sub> H <sub>21</sub> N <sub>2</sub> O <sub>2</sub> Cl |
| Formula weight                              | 416.89                                                           |
| Temperature/K                               | 100(2)                                                           |
| Crystal system                              | monoclinic                                                       |
| Space group                                 | P2 <sub>1</sub> /c                                               |
| a/Å                                         | 12.0877(6)                                                       |
| b/Å                                         | 9.3537(4)                                                        |
| c/Å                                         | 18.5922(10)                                                      |
| α/°                                         | 90                                                               |
| β/°                                         | 105.038(5)                                                       |
| γ/°                                         | 90                                                               |
| Volume/Å <sup>3</sup>                       | 2030.15(18)                                                      |
| Z                                           | 4                                                                |
| ρ <sub>calc</sub> /cm <sup>3</sup>          | 1.364                                                            |
| μ/mm <sup>-1</sup>                          | 0.213                                                            |
| F(000)                                      | 872.0                                                            |
| Crystal size/mm <sup>3</sup>                | 0.34 × 0.18 × 0.14                                               |
| Radiation                                   | MoKα (λ = 0.71073)                                               |
| 2Θ range for data collection/°              | 6.29 to 55                                                       |
| Index ranges                                | -11 ≤ h ≤ 15, -11 ≤ k ≤ 12, -21 ≤ l ≤ 24                         |
| Reflections collected                       | 11952                                                            |
| Independent reflections                     | 4647 [R <sub>int</sub> = 0.0263, R <sub>sigma</sub> = 0.0345]    |
| Data/restraints/parameters                  | 4647/0/274                                                       |
| Goodness-of-fit on F <sup>2</sup>           | 1.020                                                            |
| Final R indexes [I ≥ 2σ (I)]                | R <sub>1</sub> = 0.0373, wR <sub>2</sub> = 0.0888                |
| Final R indexes [all data]                  | R <sub>1</sub> = 0.0476, wR <sub>2</sub> = 0.0957                |
| Largest diff. peak/hole / e Å <sup>-3</sup> | 0.36/-0.30                                                       |



### Crystallographic data of compound **6c** (CCDC 2182542)

Single crystal of compound **6c** was grown by slow evaporation of EtOAc-hexane solution. A suitable crystal was selected and studied on an Agilent Technologies Supernova diffractometer. The crystal was kept at 100(2) K during data collection. Using Olex2 [1], the structure was solved with the ShelXT [4] structure solution program using Intrinsic Phasing and refined with the ShelXL [3] refinement package using Least Squares minimization.

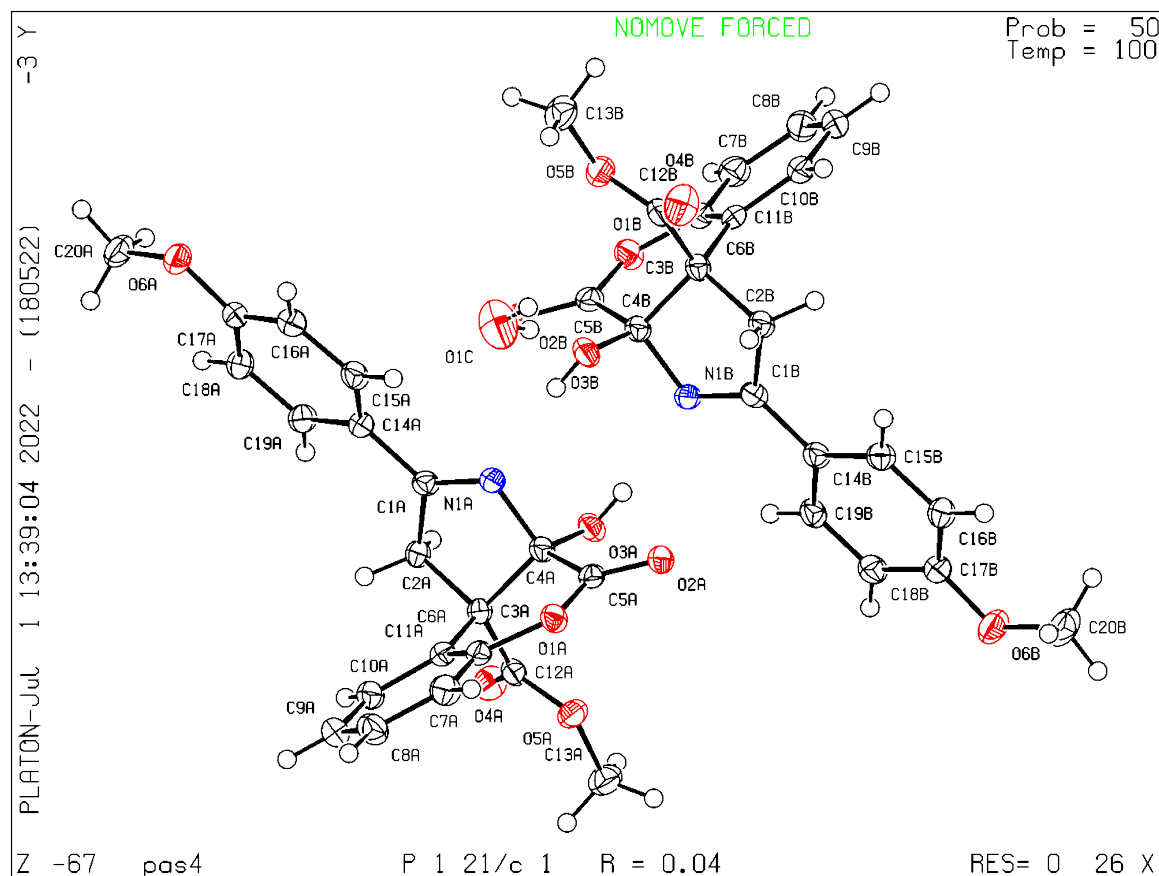

**Figure S2.** Molecular structure of compound **6c**, displacement parameters are drawn at 50% probability level.

**Table S2 Crystal data and structure refinement for 6c.**

|                                             |                                                               |
|---------------------------------------------|---------------------------------------------------------------|
| Empirical formula                           | C <sub>20</sub> H <sub>17.46</sub> NO <sub>6.23</sub>         |
| Formula weight                              | 371.45                                                        |
| Temperature/K                               | 100.01(10)                                                    |
| Crystal system                              | monoclinic                                                    |
| Space group                                 | P2 <sub>1</sub> /c                                            |
| a/Å                                         | 18.9991(6)                                                    |
| b/Å                                         | 11.0188(2)                                                    |
| c/Å                                         | 17.6331(7)                                                    |
| α/°                                         | 90                                                            |
| β/°                                         | 107.678(4)                                                    |
| γ/°                                         | 90                                                            |
| Volume/Å <sup>3</sup>                       | 3517.1(2)                                                     |
| Z                                           | 8                                                             |
| ρ <sub>calc</sub> /g/cm <sup>3</sup>        | 1.403                                                         |
| μ/mm <sup>-1</sup>                          | 0.882                                                         |
| F(000)                                      | 1554.0                                                        |
| Crystal size/mm <sup>3</sup>                | 0.45 × 0.34 × 0.26                                            |
| Radiation                                   | Cu Kα (λ = 1.54184)                                           |
| 2Θ range for data collection/°              | 9.396 to 144.988                                              |
| Index ranges                                | -23 ≤ h ≤ 22, -13 ≤ k ≤ 5, -20 ≤ l ≤ 21                       |
| Reflections collected                       | 12891                                                         |
| Independent reflections                     | 6683 [R <sub>int</sub> = 0.0310, R <sub>sigma</sub> = 0.0355] |
| Data/restraints/parameters                  | 6683/0/505                                                    |
| Goodness-of-fit on F <sup>2</sup>           | 1.077                                                         |
| Final R indexes [I ≥ 2σ (I)]                | R <sub>1</sub> = 0.0409, wR <sub>2</sub> = 0.1090             |
| Final R indexes [all data]                  | R <sub>1</sub> = 0.0591, wR <sub>2</sub> = 0.1335             |
| Largest diff. peak/hole / e Å <sup>-3</sup> | 0.34/-0.30                                                    |

### 3. References

1. Dolomanov, O.V.; Bourhis, L.J.; Gildea, R.J.; Howard, J.A.K.; Puschmann, H. OLEX2: a complete structure solution, refinement and analysis program. *J. Appl. Cryst.* **2009**, *42*, 339–341.
2. Sheldrick, G.M. A short history of SHELX. *Acta Cryst.* 2008, *A64*, 112-122.
3. Sheldrick, G.M. Crystal Structure Refinement with SHELXL. *Acta Cryst.* **2015**, *C71*, 3–8.
4. Sheldrick, G.M. SHELXT – Integrated Space-Group and Crystal-Structure Determination. *Acta Cryst.* **2015**, *A71*, 3–8.
